# Supplementary material for: Typhoid toxin sorting and exocytic transport from Salmonella Typhi-infected cells
Source: eLife journal article supplement (doi:10.7554/elife.78561), 2022-05-17

Figure 1- source data 1

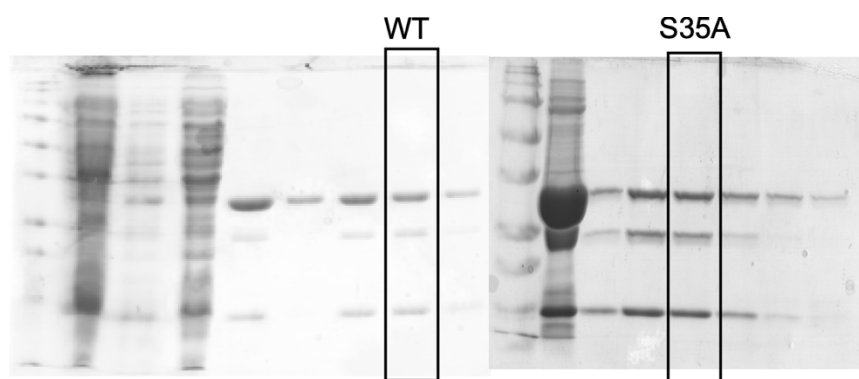

Figure 1- source data 2

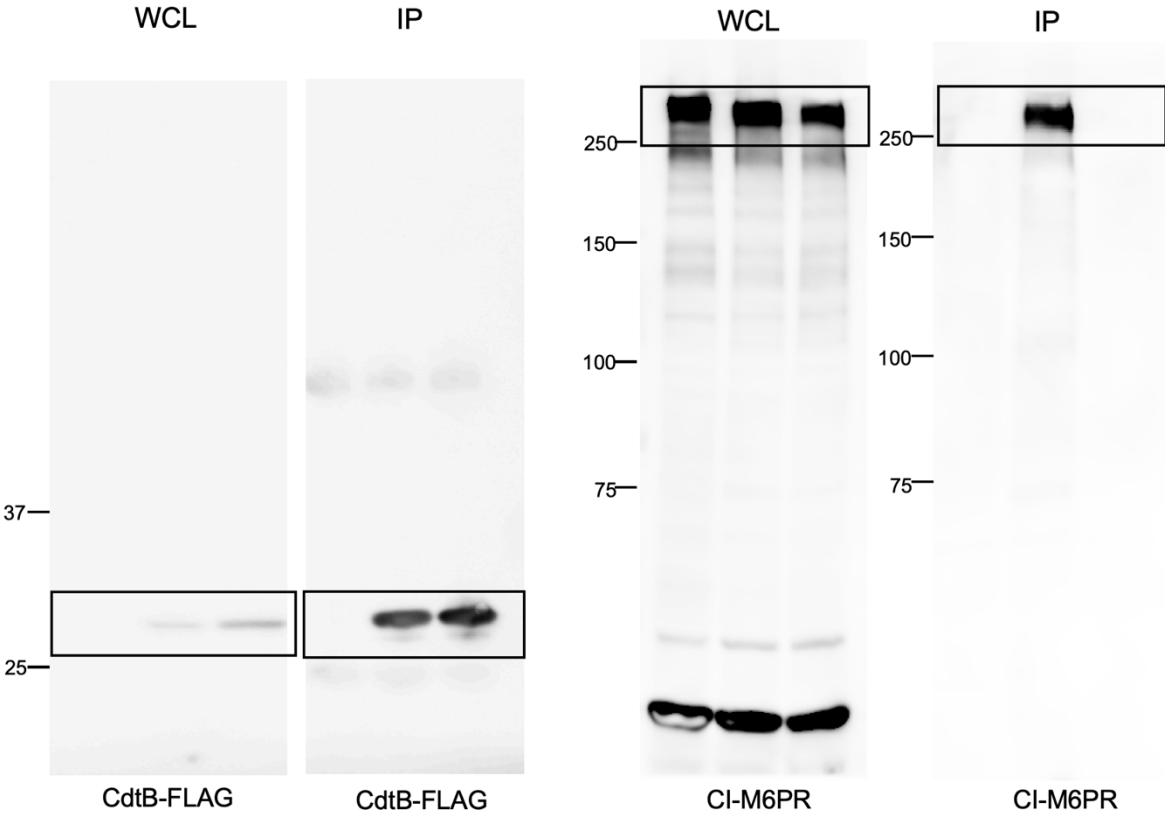

**Figure 2- figure supplement 4- source data 2**

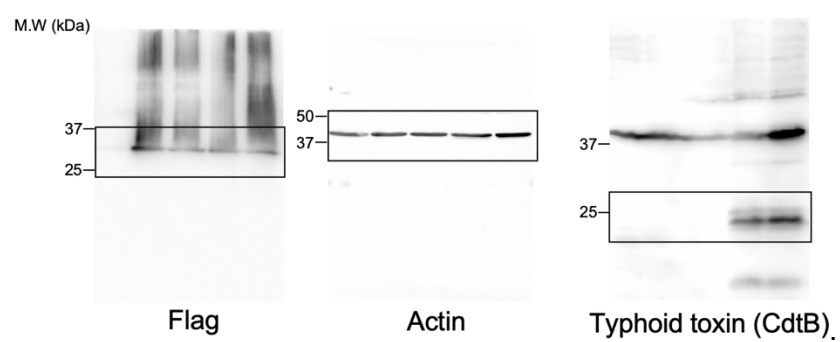

**Figure 2- source data 1**

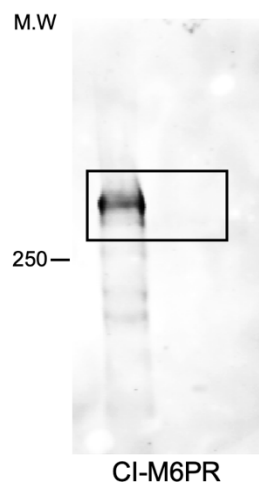

Figure 3- figure supplement 10- source data 1

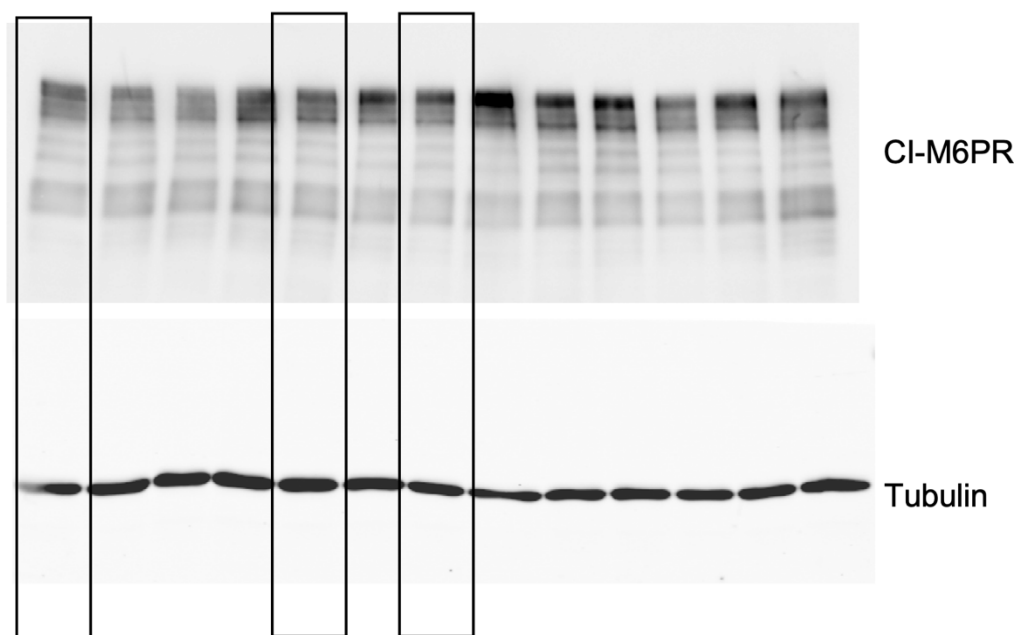

**Figure 4- figure supplement 3- source data 1**

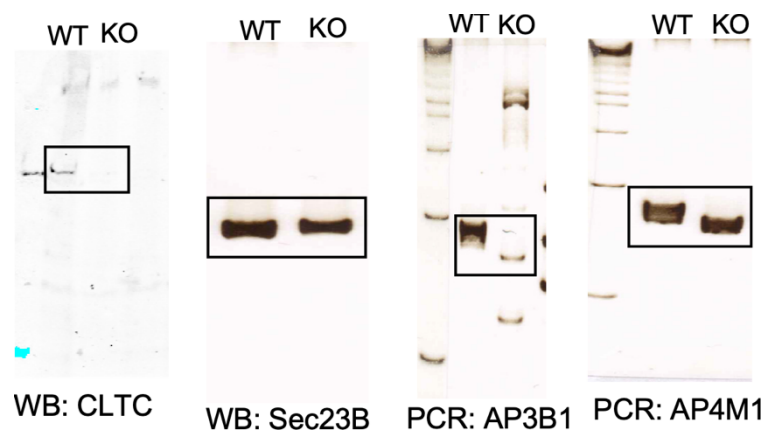

Figure 4- figure supplement 3- source data 2

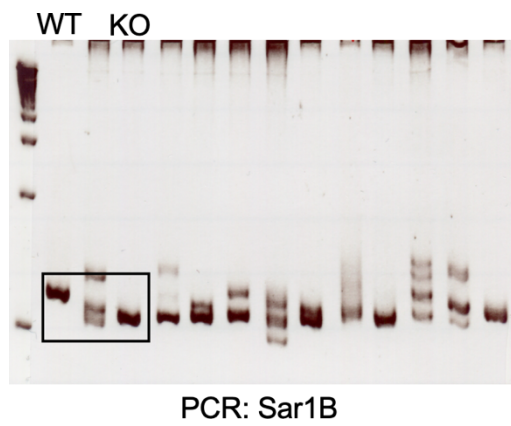

Figure 4- source data 1

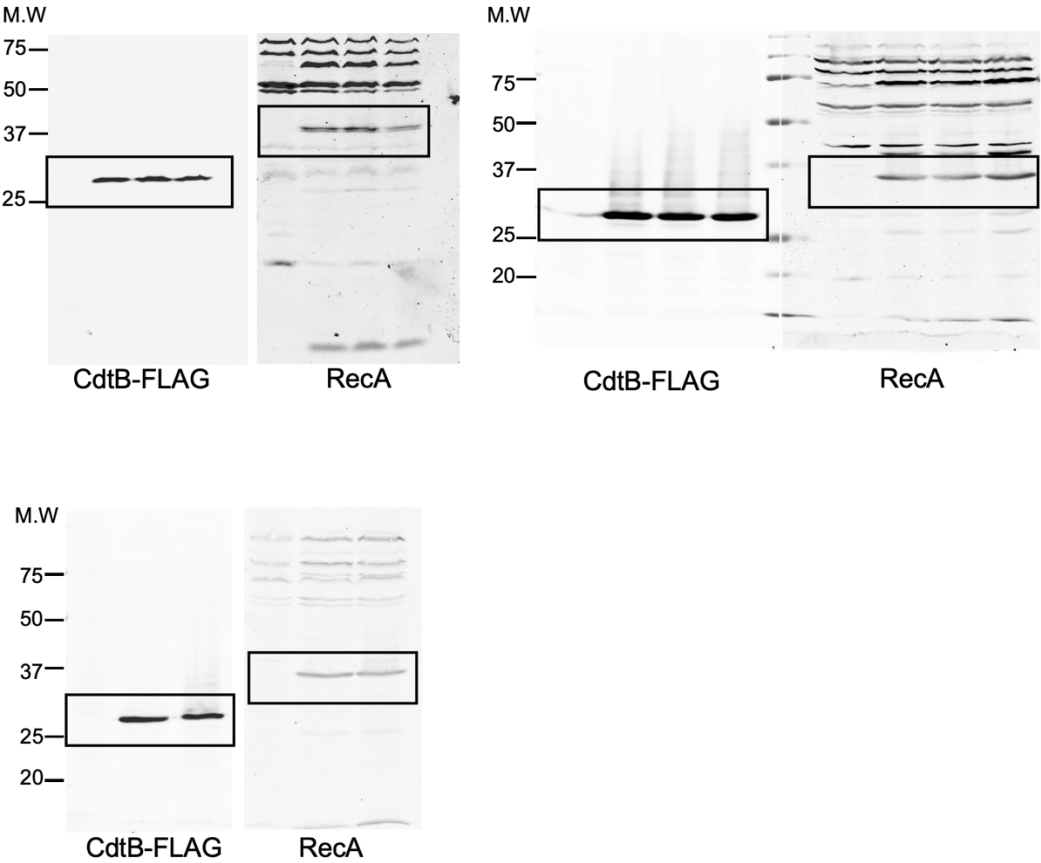



Figure 4- source data 2

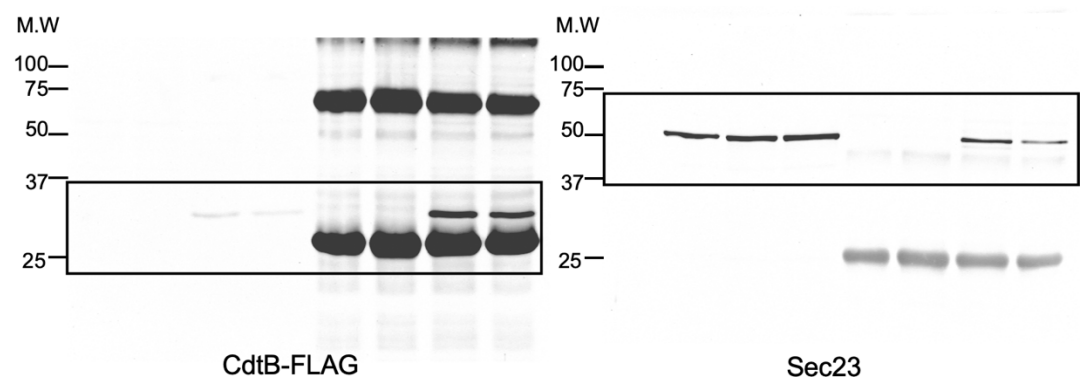

Figure 4- source data 3

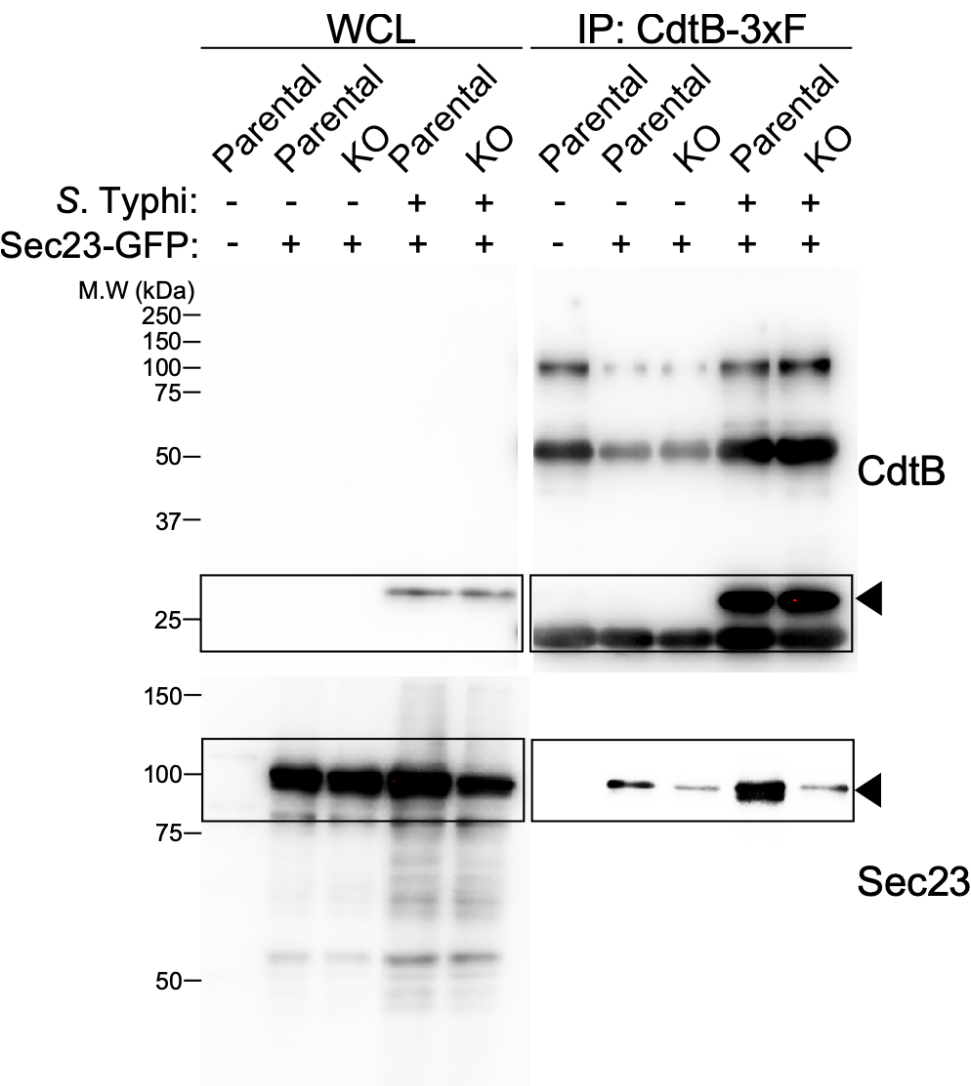

Figure 5- figure supplement 6- source data 1

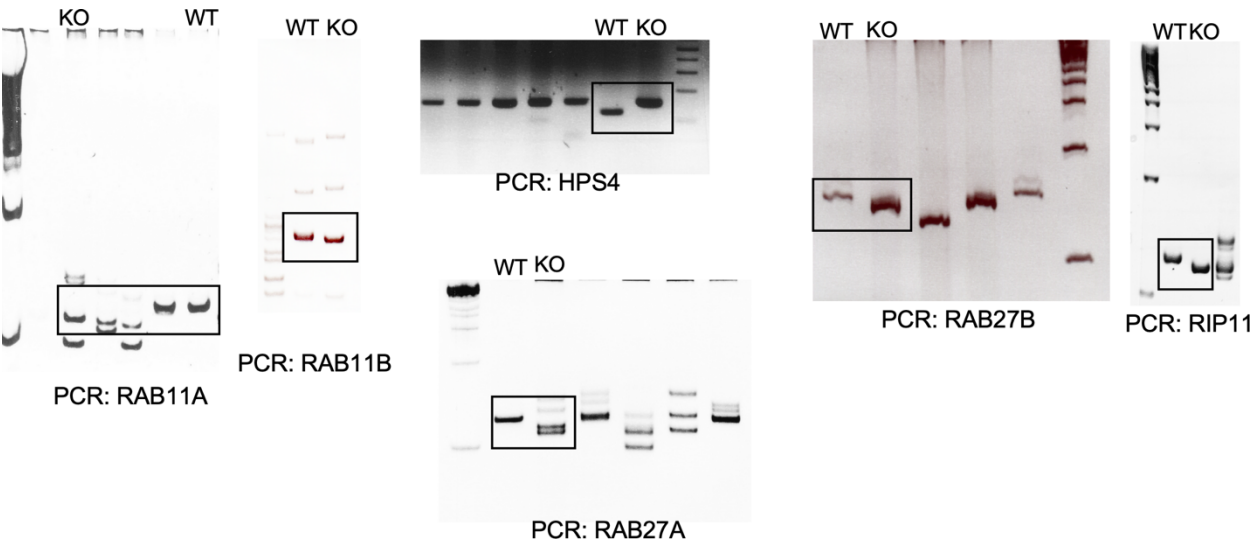

**Figure 5- source data 1**

**a**

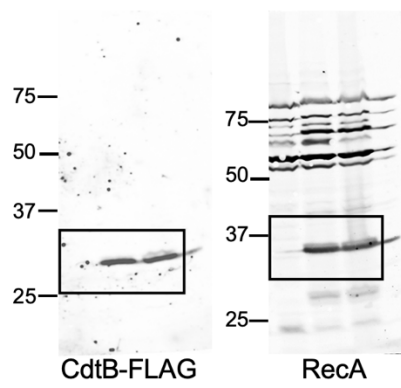

**Figure 5- source data 2**

**b**

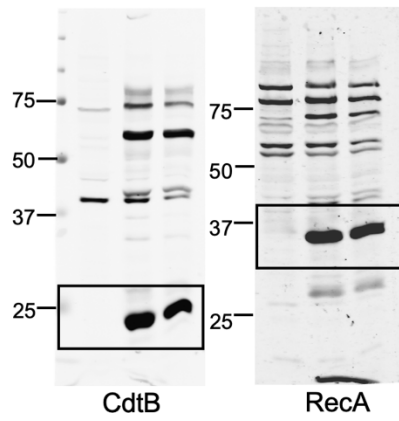

Figure 6- figure supplement 6- source data 1

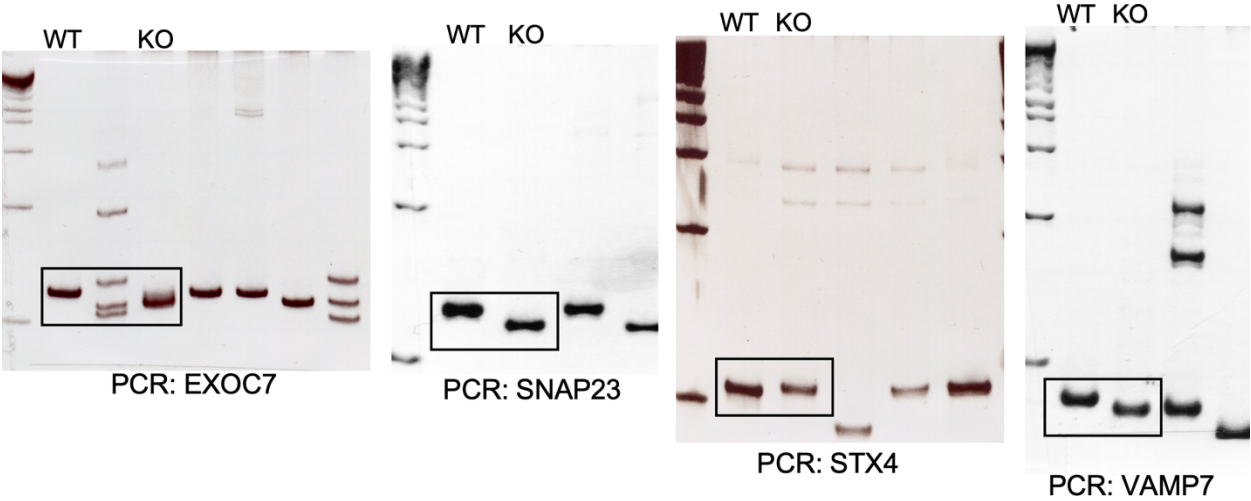

Figure 6- source data 1

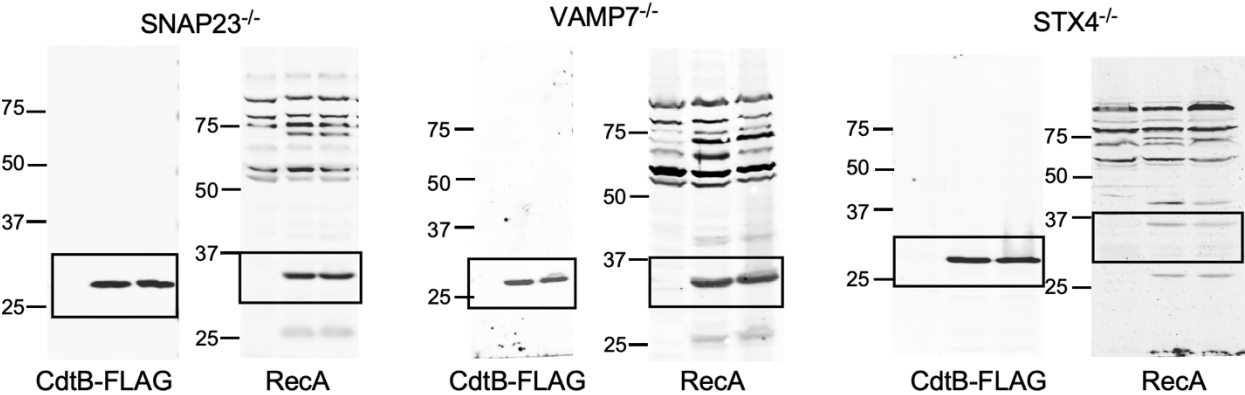

Supplement: data1 [file elife-78561-data1-v2.pdf]
