# Supplementary material for: Typhoid toxin sorting and exocytic transport from Salmonella Typhi-infected cells
Source: eLife journal article supplement (doi:10.7554/elife.78561), 2022-05-17

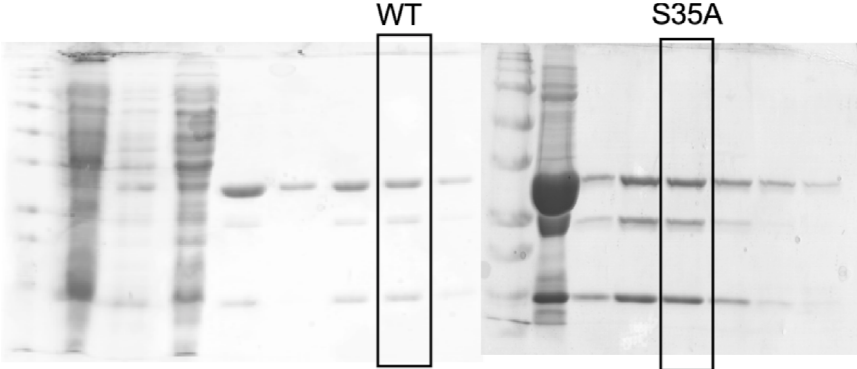

Supplement: fig1-data1 [file elife-78561-fig1-data1-v2.pdf]
