# Supplementary material for: Typhoid toxin sorting and exocytic transport from Salmonella Typhi-infected cells
Source: eLife. 2022 May 17;11:e78561. doi: 10.7554/eLife.78561 (PMC9142146; doi:10.7554/eLife.78561)
Supplement: Figure 1—source data 2. [file elife-78561-fig1-data2.xlsx]

## Sheet: Replicate 1_WT Toxin
Family	Member	Database	Accession	Score	Mass	Num. of matches	Num. of significant matches	Num. of sequences	Num. of significant sequences	emPAI	Description
1	1	SwissProt	K2C1_HUMAN	2860	66170	77	77	25	25	4.29	Keratin, type II cytoskeletal 1 OS=Homo sapiens GN=KRT1 PE=1 SV=6
1	2	SwissProt	K22E_HUMAN	802	65678	31	31	15	15	1.63	Keratin, type II cytoskeletal 2 epidermal OS=Homo sapiens GN=KRT2 PE=1 SV=2
1	3	SwissProt	K2C5_HUMAN	301	62568	13	13	8	8	0.72	Keratin, type II cytoskeletal 5 OS=Homo sapiens GN=KRT5 PE=1 SV=3
1	4	SwissProt	K2C6A_HUMAN	275	60293	10	10	5	5	0.42	Keratin, type II cytoskeletal 6A OS=Homo sapiens GN=KRT6A PE=1 SV=3
1	5	SwissProt	K2C71_HUMAN	44	57769	3	3	2	2	0.16	Keratin, type II cytoskeletal 71 OS=Homo sapiens GN=KRT71 PE=1 SV=3
2	1	SwissProt	K1C10_HUMAN	2661	59020	75	75	22	22	5	Keratin, type I cytoskeletal 10 OS=Homo sapiens GN=KRT10 PE=1 SV=6
2	2	SwissProt	K1C9_HUMAN	2206	62255	62	62	22	22	4.47	Keratin, type I cytoskeletal 9 OS=Homo sapiens GN=KRT9 PE=1 SV=3
2	3	SwissProt	K1C14_HUMAN	405	51872	18	18	11	11	1.45	Keratin, type I cytoskeletal 14 OS=Homo sapiens GN=KRT14 PE=1 SV=4
2	4	SwissProt	K1C17_HUMAN	144	48361	7	7	5	5	0.55	Keratin, type I cytoskeletal 17 OS=Homo sapiens GN=KRT17 PE=1 SV=2
3	1	SwissProt	TBB5_HUMAN	2654	50095	89	89	15	15	2.55	Tubulin beta chain OS=Homo sapiens GN=TUBB PE=1 SV=2
3	2	SwissProt	TBB4B_HUMAN	1124	50255	43	43	11	11	1.52	Tubulin beta-4B chain OS=Homo sapiens GN=TUBB4B PE=1 SV=1
4	1	SwissProt	TBA1B_HUMAN	1986	50804	49	49	10	10	1.5	Tubulin alpha-1B chain OS=Homo sapiens GN=TUBA1B PE=1 SV=1
4	2	SwissProt	TBA1A_HUMAN	1489	50788	37	37	10	10	1.5	Tubulin alpha-1A chain OS=Homo sapiens GN=TUBA1A PE=1 SV=1
5	1	SwissProt	LAMP2_HUMAN	1436	45503	49	49	5	5	0.59	Lysosome-associated membrane glycoprotein 2 OS=Homo sapiens GN=LAMP2 PE=1 SV=2
6	1	SwissProt	ADT2_HUMAN	1131	33059	41	41	6	6	1.15	ADP/ATP translocase 2 OS=Homo sapiens GN=SLC25A5 PE=1 SV=7
6	2	SwissProt	ADT3_HUMAN	357	33073	14	14	6	6	1.15	ADP/ATP translocase 3 OS=Homo sapiens GN=SLC25A6 PE=1 SV=4
6	3	SwissProt	ADT1_HUMAN	129	33271	8	8	5	5	0.88	ADP/ATP translocase 1 OS=Homo sapiens GN=SLC25A4 PE=1 SV=4
7	1	SwissProt	ECE1_HUMAN	988	87906	49	49	16	16	1.16	Endothelin-converting enzyme 1 OS=Homo sapiens GN=ECE1 PE=1 SV=2
8	1	SwissProt	CBPD_HUMAN	874	153919	35	35	9	9	0.28	Carboxypeptidase D OS=Homo sapiens GN=CPD PE=1 SV=2
9	1	SwissProt	MPRI_HUMAN	783	281155	39	39	23	23	0.42	Cation-independent mannose-6-phosphate receptor OS=Homo sapiens GN=IGF2R PE=1 SV=3
10	1	SwissProt	LAMP1_HUMAN	750	45367	18	18	5	5	0.59	Lysosome-associated membrane glycoprotein 1 OS=Homo sapiens GN=LAMP1 PE=1 SV=3
11	1	SwissProt	VA0D1_HUMAN	692	40759	19	19	6	6	0.86	V-type proton ATPase subunit d 1 OS=Homo sapiens GN=ATP6V0D1 PE=1 SV=1
12	1	SwissProt	ITB1_HUMAN	623	91664	18	18	9	9	0.52	Integrin beta-1 OS=Homo sapiens GN=ITGB1 PE=1 SV=2
13	1	SwissProt	HSP7C_HUMAN	579	71082	25	25	4	4	0.27	Heat shock cognate 71 kDa protein OS=Homo sapiens GN=HSPA8 PE=1 SV=1
14	1	SwissProt	PDXL2_HUMAN	563	65435	14	14	4	4	0.47	Podocalyxin-like protein 2 OS=Homo sapiens GN=PODXL2 PE=1 SV=1
15	1	SwissProt	LDLR_HUMAN	557	98906	16	16	6	6	0.29	Low-density lipoprotein receptor OS=Homo sapiens GN=LDLR PE=1 SV=1
16	1	SwissProt	ENPP1_HUMAN	541	107024	21	21	6	6	0.32	Ectonucleotide pyrophosphatase/phosphodiesterase family member 1 OS=Homo sapiens GN=ENPP1 PE=1 SV=2
17	1	SwissProt	LCAP_HUMAN	536	117787	18	18	10	10	0.49	Leucyl-cystinyl aminopeptidase OS=Homo sapiens GN=LNPEP PE=1 SV=3
18	1	SwissProt	S4A7_HUMAN	523	137098	15	15	6	6	0.2	Sodium bicarbonate cotransporter 3 OS=Homo sapiens GN=SLC4A7 PE=1 SV=2
19	1	SwissProt	LRC8C_HUMAN	499	93359	10	10	2	2	0.1	Volume-regulated anion channel subunit LRRC8C OS=Homo sapiens GN=LRRC8C PE=1 SV=2
20	1	SwissProt	B3A2_HUMAN	494	137493	20	20	10	10	0.36	Anion exchange protein 2 OS=Homo sapiens GN=SLC4A2 PE=1 SV=4
21	1	SwissProt	LRC8A_HUMAN	492	95051	18	18	10	10	0.56	Volume-regulated anion channel subunit LRRC8A OS=Homo sapiens GN=LRRC8A PE=1 SV=1
22	1	SwissProt	ITA2_HUMAN	474	130468	18	18	10	10	0.39	Integrin alpha-2 OS=Homo sapiens GN=ITGA2 PE=1 SV=1
23	1	SwissProt	PTPRA_HUMAN	469	91455	22	22	10	10	0.59	Receptor-type tyrosine-protein phosphatase alpha OS=Homo sapiens GN=PTPRA PE=1 SV=2
24	1	SwissProt	NICA_HUMAN	446	79103	14	14	5	5	0.31	Nicastrin OS=Homo sapiens GN=NCSTN PE=1 SV=2
25	1	SwissProt	S39AE_HUMAN	434	54918	8	8	2	2	0.17	Zinc transporter ZIP14 OS=Homo sapiens GN=SLC39A14 PE=1 SV=3
26	1	SwissProt	MEP50_HUMAN	426	37442	14	14	6	6	0.97	Methylosome protein 50 OS=Homo sapiens GN=WDR77 PE=1 SV=1
27	1	SwissProt	ECHA_HUMAN	413	83688	20	20	10	10	0.75	Trifunctional enzyme subunit alpha, mitochondrial OS=Homo sapiens GN=HADHA PE=1 SV=2
28	1	SwissProt	BASI_HUMAN	394	42573	18	18	7	7	1.21	Basigin OS=Homo sapiens GN=BSG PE=1 SV=2
29	1	SwissProt	K319L_HUMAN	392	116669	11	11	5	5	0.2	Dyslexia-associated protein KIAA0319-like protein OS=Homo sapiens GN=KIAA0319L PE=1 SV=2
30	1	SwissProt	IGF1R_HUMAN	384	157202	16	16	6	6	0.21	Insulin-like growth factor 1 receptor OS=Homo sapiens GN=IGF1R PE=1 SV=1
30	2	SwissProt	INSR_HUMAN	194	158912	9	9	7	7	0.24	Insulin receptor OS=Homo sapiens GN=INSR PE=1 SV=4
31	1	SwissProt	ATPB_HUMAN	379	56525	12	12	7	7	0.69	ATP synthase subunit beta, mitochondrial OS=Homo sapiens GN=ATP5B PE=1 SV=3
32	1	SwissProt	S12A7_HUMAN	376	120283	10	10	7	7	0.28	Solute carrier family 12 member 7 OS=Homo sapiens GN=SLC12A7 PE=1 SV=3
33	1	SwissProt	1433E_HUMAN	363	29326	11	11	4	4	0.77	14-3-3 protein epsilon OS=Homo sapiens GN=YWHAE PE=1 SV=1
33	2	SwissProt	1433T_HUMAN	317	28032	10	10	4	4	0.82	14-3-3 protein theta OS=Homo sapiens GN=YWHAQ PE=1 SV=1
33	3	SwissProt	1433B_HUMAN	208	28179	6	6	2	2	0.35	14-3-3 protein beta/alpha OS=Homo sapiens GN=YWHAB PE=1 SV=3
33	4	SwissProt	1433Z_HUMAN	175	27899	6	6	2	2	0.35	14-3-3 protein zeta/delta OS=Homo sapiens GN=YWHAZ PE=1 SV=1
34	1	SwissProt	AAAT_HUMAN	359	57018	11	11	4	4	0.35	Neutral amino acid transporter B(0) OS=Homo sapiens GN=SLC1A5 PE=1 SV=2
35	1	SwissProt	NPC1_HUMAN	341	144868	20	20	7	7	0.23	Niemann-Pick C1 protein OS=Homo sapiens GN=NPC1 PE=1 SV=2
36	1	SwissProt	TXD12_HUMAN	340	19365	16	16	4	4	1.37	Thioredoxin domain-containing protein 12 OS=Homo sapiens GN=TXNDC12 PE=1 SV=1
37	1	SwissProt	AGRL2_HUMAN	337	165468	16	16	10	10	0.29	Adhesion G protein-coupled receptor L2 OS=Homo sapiens GN=ADGRL2 PE=1 SV=2
38	1	SwissProt	TPBG_HUMAN	333	46573	24	24	3	3	0.31	Trophoblast glycoprotein OS=Homo sapiens GN=TPBG PE=1 SV=1
39	1	SwissProt	PPAL_HUMAN	329	48713	11	11	4	4	0.41	Lysosomal acid phosphatase OS=Homo sapiens GN=ACP2 PE=1 SV=3
41	1	SwissProt	EF2_HUMAN	320	96246	15	15	7	7	0.36	Elongation factor 2 OS=Homo sapiens GN=EEF2 PE=1 SV=4
42	1	SwissProt	ITA6_HUMAN	318	127724	15	15	7	7	0.26	Integrin alpha-6 OS=Homo sapiens GN=ITGA6 PE=1 SV=5
43	1	SwissProt	EF1A1_HUMAN	315	50451	12	12	4	4	0.4	Elongation factor 1-alpha 1 OS=Homo sapiens GN=EEF1A1 PE=1 SV=1
44	1	SwissProt	ATPA_HUMAN	314	59828	9	9	5	5	0.42	ATP synthase subunit alpha, mitochondrial OS=Homo sapiens GN=ATP5A1 PE=1 SV=1
45	1	SwissProt	CLCN7_HUMAN	298	89136	20	20	8	8	0.53	H(+)/Cl(-) exchange transporter 7 OS=Homo sapiens GN=CLCN7 PE=1 SV=2
46	1	SwissProt	PODXL_HUMAN	297	59055	11	11	6	6	0.54	Podocalyxin OS=Homo sapiens GN=PODXL PE=1 SV=2
47	1	SwissProt	IGKC_HUMAN	295	11929	9	9	2	2	1	Immunoglobulin kappa constant OS=Homo sapiens GN=IGKC PE=1 SV=2
48	1	SwissProt	IMB1_HUMAN	287	98420	10	10	5	5	0.24	Importin subunit beta-1 OS=Homo sapiens GN=KPNB1 PE=1 SV=2
49	1	SwissProt	CADM1_HUMAN	250	48935	6	6	3	3	0.3	Cell adhesion molecule 1 OS=Homo sapiens GN=CADM1 PE=1 SV=2
50	1	SwissProt	ATPO_HUMAN	245	23377	10	10	2	2	0.43	ATP synthase subunit O, mitochondrial OS=Homo sapiens GN=ATP5O PE=1 SV=1
51	1	SwissProt	CD276_HUMAN	233	57941	5	5	2	2	0.16	CD276 antigen OS=Homo sapiens GN=CD276 PE=1 SV=1
52	1	SwissProt	C1QBP_HUMAN	217	31742	8	8	3	3	0.49	Complement component 1 Q subcomponent-binding protein, mitochondrial OS=Homo sapiens GN=C1QBP PE=1 SV=1
53	1	SwissProt	HS71A_HUMAN	214	70294	9	9	7	7	0.53	Heat shock 70 kDa protein 1A OS=Homo sapiens GN=HSPA1A PE=1 SV=1
54	1	SwissProt	HNRPK_HUMAN	212	51230	4	4	2	2	0.18	Heterogeneous nuclear ribonucleoprotein K OS=Homo sapiens GN=HNRNPK PE=1 SV=1
55	1	SwissProt	MRC2_HUMAN	211	169761	5	5	3	3	0.08	C-type mannose receptor 2 OS=Homo sapiens GN=MRC2 PE=1 SV=2
56	1	SwissProt	CLCN3_HUMAN	211	91934	6	6	4	4	0.2	H(+)/Cl(-) exchange transporter 3 OS=Homo sapiens GN=CLCN3 PE=1 SV=2
57	1	SwissProt	VPP1_HUMAN	205	97148	9	9	4	4	0.19	V-type proton ATPase 116 kDa subunit a isoform 1 OS=Homo sapiens GN=ATP6V0A1 PE=1 SV=3
58	1	SwissProt	4F2_HUMAN	201	68180	12	12	8	8	0.64	4F2 cell-surface antigen heavy chain OS=Homo sapiens GN=SLC3A2 PE=1 SV=3
60	1	SwissProt	ACTB_HUMAN	185	42052	13	13	6	6	0.83	Actin, cytoplasmic 1 OS=Homo sapiens GN=ACTB PE=1 SV=1
61	1	SwissProt	NHRF2_HUMAN	184	37619	6	6	3	3	0.4	Na(+)/H(+) exchange regulatory cofactor NHE-RF2 OS=Homo sapiens GN=SLC9A3R2 PE=1 SV=2
62	1	SwissProt	ATRN_HUMAN	183	163450	7	7	6	6	0.17	Attractin OS=Homo sapiens GN=ATRN PE=1 SV=2
64	1	SwissProt	K1549_HUMAN	163	211253	7	7	4	4	0.08	UPF0606 protein KIAA1549 OS=Homo sapiens GN=KIAA1549 PE=1 SV=4
65	1	SwissProt	CH60_HUMAN	161	61187	6	6	6	6	0.51	60 kDa heat shock protein, mitochondrial OS=Homo sapiens GN=HSPD1 PE=1 SV=2
66	1	SwissProt	QSOX2_HUMAN	158	78221	4	4	3	3	0.18	Sulfhydryl oxidase 2 OS=Homo sapiens GN=QSOX2 PE=1 SV=3
67	1	SwissProt	KVD26_HUMAN	152	13403	3	3	2	2	0.85	Immunoglobulin kappa variable 2D-26 OS=Homo sapiens GN=IGKV2D-26 PE=3 SV=1
68	1	SwissProt	FPRP_HUMAN	150	99464	11	11	9	9	0.47	Prostaglandin F2 receptor negative regulator OS=Homo sapiens GN=PTGFRN PE=1 SV=2
69	1	SwissProt	LRP1_HUMAN	148	523150	12	12	10	10	0.08	Prolow-density lipoprotein receptor-related protein 1 OS=Homo sapiens GN=LRP1 PE=1 SV=2
70	1	SwissProt	ANM5_HUMAN	148	73322	8	8	5	5	0.33	Protein arginine N-methyltransferase 5 OS=Homo sapiens GN=PRMT5 PE=1 SV=4
71	1	SwissProt	SERA_HUMAN	146	57356	8	8	4	4	0.34	D-3-phosphoglycerate dehydrogenase OS=Homo sapiens GN=PHGDH PE=1 SV=4
73	1	SwissProt	PRKDC_HUMAN	142	473749	8	8	7	7	0.06	DNA-dependent protein kinase catalytic subunit OS=Homo sapiens GN=PRKDC PE=1 SV=3
76	1	SwissProt	ENPP4_HUMAN	138	52007	5	5	3	3	0.28	Bis(5'-adenosyl)-triphosphatase ENPP4 OS=Homo sapiens GN=ENPP4 PE=1 SV=3
77	1	SwissProt	ENOA_HUMAN	136	47481	3	3	2	2	0.19	Alpha-enolase OS=Homo sapiens GN=ENO1 PE=1 SV=2
78	1	SwissProt	ERP44_HUMAN	134	47341	5	5	2	2	0.2	Endoplasmic reticulum resident protein 44 OS=Homo sapiens GN=ERP44 PE=1 SV=1
79	1	SwissProt	AT1A1_HUMAN	132	114135	7	7	5	5	0.2	Sodium/potassium-transporting ATPase subunit alpha-1 OS=Homo sapiens GN=ATP1A1 PE=1 SV=1
80	1	SwissProt	LRC8E_HUMAN	132	91387	4	4	3	3	0.15	Volume-regulated anion channel subunit LRRC8E OS=Homo sapiens GN=LRRC8E PE=1 SV=2
81	1	SwissProt	TMEM9_HUMAN	131	21074	4	4	2	2	0.49	Transmembrane protein 9 OS=Homo sapiens GN=TMEM9 PE=1 SV=1
83	1	SwissProt	VDAC1_HUMAN	124	30868	3	3	2	2	0.31	Voltage-dependent anion-selective channel protein 1 OS=Homo sapiens GN=VDAC1 PE=1 SV=2
84	1	SwissProt	PVR_HUMAN	122	45787	4	4	3	3	0.32	Poliovirus receptor OS=Homo sapiens GN=PVR PE=1 SV=2
85	1	SwissProt	ITAV_HUMAN	114	117048	6	6	4	4	0.16	Integrin alpha-V OS=Homo sapiens GN=ITGAV PE=1 SV=2
86	1	SwissProt	MUC18_HUMAN	109	72532	7	7	5	5	0.34	Cell surface glycoprotein MUC18 OS=Homo sapiens GN=MCAM PE=1 SV=2
87	1	SwissProt	TELO2_HUMAN	104	92430	2	2	2	2	0.1	Telomere length regulation protein TEL2 homolog OS=Homo sapiens GN=TELO2 PE=1 SV=2
90	1	SwissProt	COPT1_HUMAN	96	21190	3	3	2	2	0.48	High affinity copper uptake protein 1 OS=Homo sapiens GN=SLC31A1 PE=1 SV=1
91	1	SwissProt	RS10_HUMAN	96	18886	4	4	2	2	0.56	40S ribosomal protein S10 OS=Homo sapiens GN=RPS10 PE=1 SV=1
93	1	SwissProt	NCAM1_HUMAN	93	95370	6	6	5	5	0.25	Neural cell adhesion molecule 1 OS=Homo sapiens GN=NCAM1 PE=1 SV=3
94	1	SwissProt	EF1G_HUMAN	92	50429	5	5	3	3	0.29	Elongation factor 1-gamma OS=Homo sapiens GN=EEF1G PE=1 SV=3
95	1	SwissProt	KCRB_HUMAN	92	42902	5	5	3	3	0.34	Creatine kinase B-type OS=Homo sapiens GN=CKB PE=1 SV=1
97	1	SwissProt	PRDX6_HUMAN	90	25133	3	3	2	2	0.4	Peroxiredoxin-6 OS=Homo sapiens GN=PRDX6 PE=1 SV=3
98	1	SwissProt	RS18_HUMAN	85	17708	4	4	2	2	0.6	40S ribosomal protein S18 OS=Homo sapiens GN=RPS18 PE=1 SV=3
99	1	SwissProt	RL12_HUMAN	83	17979	2	2	2	2	0.59	60S ribosomal protein L12 OS=Homo sapiens GN=RPL12 PE=1 SV=1
100	1	SwissProt	MPCP_HUMAN	83	40525	3	3	2	2	0.23	Phosphate carrier protein, mitochondrial OS=Homo sapiens GN=SLC25A3 PE=1 SV=2
101	1	SwissProt	RS4X_HUMAN	81	29807	3	3	2	2	0.33	40S ribosomal protein S4, X isoform OS=Homo sapiens GN=RPS4X PE=1 SV=2
102	1	SwissProt	KPYM_HUMAN	81	58470	2	2	2	2	0.16	Pyruvate kinase PKM OS=Homo sapiens GN=PKM PE=1 SV=4
104	1	SwissProt	DDX3X_HUMAN	79	73597	2	2	2	2	0.12	ATP-dependent RNA helicase DDX3X OS=Homo sapiens GN=DDX3X PE=1 SV=3
105	1	SwissProt	IPO7_HUMAN	79	120751	5	5	3	3	0.11	Importin-7 OS=Homo sapiens GN=IPO7 PE=1 SV=1
107	1	SwissProt	PIP_HUMAN	77	16847	5	5	2	2	0.64	Prolactin-inducible protein OS=Homo sapiens GN=PIP PE=1 SV=1
108	1	SwissProt	CTR1_HUMAN	77	68449	3	3	2	2	0.13	High affinity cationic amino acid transporter 1 OS=Homo sapiens GN=SLC7A1 PE=1 SV=1
110	1	SwissProt	AT133_HUMAN	75	139778	5	5	5	5	0.16	Probable cation-transporting ATPase 13A3 OS=Homo sapiens GN=ATP13A3 PE=1 SV=4
111	1	SwissProt	SMD1_HUMAN	75	13273	3	3	2	2	0.86	Small nuclear ribonucleoprotein Sm D1 OS=Homo sapiens GN=SNRPD1 PE=1 SV=1
112	1	SwissProt	TCPD_HUMAN	74	58401	2	2	2	2	0.16	T-complex protein 1 subunit delta OS=Homo sapiens GN=CCT4 PE=1 SV=4
113	1	SwissProt	VPP2_HUMAN	74	99102	3	3	2	2	0.09	V-type proton ATPase 116 kDa subunit a isoform 2 OS=Homo sapiens GN=ATP6V0A2 PE=1 SV=2
114	1	SwissProt	TCPB_HUMAN	74	57794	3	3	2	2	0.16	T-complex protein 1 subunit beta OS=Homo sapiens GN=CCT2 PE=1 SV=4
115	1	SwissProt	GNPTA_HUMAN	73	144785	2	2	2	2	0.06	N-acetylglucosamine-1-phosphotransferase subunits alpha/beta OS=Homo sapiens GN=GNPTAB PE=1 SV=1
116	1	SwissProt	ACTN1_HUMAN	73	103563	2	2	2	2	0.09	Alpha-actinin-1 OS=Homo sapiens GN=ACTN1 PE=1 SV=2
118	1	SwissProt	LDHB_HUMAN	73	36900	2	2	2	2	0.26	L-lactate dehydrogenase B chain OS=Homo sapiens GN=LDHB PE=1 SV=2
119	1	SwissProt	S12A6_HUMAN	72	128618	2	2	2	2	0.07	Solute carrier family 12 member 6 OS=Homo sapiens GN=SLC12A6 PE=1 SV=2
120	1	SwissProt	ATPK_HUMAN	72	11025	3	3	2	2	1.11	ATP synthase subunit f, mitochondrial OS=Homo sapiens GN=ATP5J2 PE=1 SV=3
122	1	SwissProt	ATPG_HUMAN	70	33032	4	4	2	2	0.29	ATP synthase subunit gamma, mitochondrial OS=Homo sapiens GN=ATP5C1 PE=1 SV=1
124	1	SwissProt	ATX10_HUMAN	69	54196	3	3	2	2	0.17	Ataxin-10 OS=Homo sapiens GN=ATXN10 PE=1 SV=1
125	1	SwissProt	SFPQ_HUMAN	68	76216	2	2	2	2	0.12	Splicing factor, proline- and glutamine-rich OS=Homo sapiens GN=SFPQ PE=1 SV=2
127	1	SwissProt	CNNM4_HUMAN	67	87122	2	2	2	2	0.1	Metal transporter CNNM4 OS=Homo sapiens GN=CNNM4 PE=1 SV=3
128	1	SwissProt	NP1L1_HUMAN	67	45631	2	2	2	2	0.2	Nucleosome assembly protein 1-like 1 OS=Homo sapiens GN=NAP1L1 PE=1 SV=1
130	1	SwissProt	CD320_HUMAN	66	29998	2	2	2	2	0.32	CD320 antigen OS=Homo sapiens GN=CD320 PE=1 SV=1
136	1	SwissProt	SDK2_HUMAN	61	240160	3	3	2	2	0.04	Protein sidekick-2 OS=Homo sapiens GN=SDK2 PE=1 SV=3
140	1	SwissProt	SAP_HUMAN	59	59899	3	3	2	2	0.15	Prosaposin OS=Homo sapiens GN=PSAP PE=1 SV=2
141	1	SwissProt	XPO5_HUMAN	59	138332	4	4	2	2	0.06	Exportin-5 OS=Homo sapiens GN=XPO5 PE=1 SV=1
158	1	SwissProt	FAS_HUMAN	52	275877	3	3	3	3	0.05	Fatty acid synthase OS=Homo sapiens GN=FASN PE=1 SV=3
160	1	SwissProt	SE6L2_HUMAN	51	99038	2	2	2	2	0.09	Seizure 6-like protein 2 OS=Homo sapiens GN=SEZ6L2 PE=1 SV=2
161	1	SwissProt	S12A2_HUMAN	51	132048	4	4	3	3	0.1	Solute carrier family 12 member 2 OS=Homo sapiens GN=SLC12A2 PE=1 SV=1
162	1	SwissProt	BGAL_HUMAN	51	76483	3	3	3	3	0.18	Beta-galactosidase OS=Homo sapiens GN=GLB1 PE=1 SV=2
165	1	SwissProt	TCPA_HUMAN	49	60819	2	2	2	2	0.15	T-complex protein 1 subunit alpha OS=Homo sapiens GN=TCP1 PE=1 SV=1
170	1	SwissProt	TPIS_HUMAN	48	31057	2	2	2	2	0.31	Triosephosphate isomerase OS=Homo sapiens GN=TPI1 PE=1 SV=3
175	1	SwissProt	CD166_HUMAN	46	65745	2	2	2	2	0.14	CD166 antigen OS=Homo sapiens GN=ALCAM PE=1 SV=2
176	1	SwissProt	DNJA1_HUMAN	46	45581	3	3	2	2	0.2	DnaJ homolog subfamily A member 1 OS=Homo sapiens GN=DNAJA1 PE=1 SV=2
182	1	SwissProt	PHB_HUMAN	45	29843	2	2	2	2	0.33	Prohibitin OS=Homo sapiens GN=PHB PE=1 SV=1
184	1	SwissProt	AGRL1_HUMAN	45	164609	2	2	2	2	0.05	Adhesion G protein-coupled receptor L1 OS=Homo sapiens GN=ADGRL1 PE=1 SV=1
185	1	SwissProt	HS90B_HUMAN	45	83554	4	4	4	4	0.23	Heat shock protein HSP 90-beta OS=Homo sapiens GN=HSP90AB1 PE=1 SV=4
186	1	SwissProt	VDAC2_HUMAN	45	32060	3	3	2	2	0.3	Voltage-dependent anion-selective channel protein 2 OS=Homo sapiens GN=VDAC2 PE=1 SV=2
189	1	SwissProt	HNRPD_HUMAN	44	38581	2	2	2	2	0.24	Heterogeneous nuclear ribonucleoprotein D0 OS=Homo sapiens GN=HNRNPD PE=1 SV=1
200	1	SwissProt	UBA1_HUMAN	41	118858	2	2	2	2	0.07	Ubiquitin-like modifier-activating enzyme 1 OS=Homo sapiens GN=UBA1 PE=1 SV=3
203	1	SwissProt	VATA_HUMAN	40	68660	2	2	2	2	0.13	V-type proton ATPase catalytic subunit A OS=Homo sapiens GN=ATP6V1A PE=1 SV=2
208	1	SwissProt	F1712_HUMAN	39	87723	3	3	2	2	0.1	Protein FAM171A2 OS=Homo sapiens GN=FAM171A2 PE=1 SV=1
208	2	SwissProt	F1711_HUMAN	26	98477	2	2	2	2	0.09	Protein FAM171A1 OS=Homo sapiens GN=FAM171A1 PE=1 SV=1
215	1	SwissProt	SC5A3_HUMAN	37	80497	2	2	2	2	0.11	Sodium/myo-inositol cotransporter OS=Homo sapiens GN=SLC5A3 PE=1 SV=2
216	1	SwissProt	RL22_HUMAN	37	14835	2	2	2	2	0.75	60S ribosomal protein L22 OS=Homo sapiens GN=RPL22 PE=1 SV=2
222	1	SwissProt	A4_HUMAN	35	87914	2	2	2	2	0.1	Amyloid beta A4 protein OS=Homo sapiens GN=APP PE=1 SV=3
227	1	SwissProt	TSN3_HUMAN	34	28797	2	2	2	2	0.34	Tetraspanin-3 OS=Homo sapiens GN=TSPAN3 PE=2 SV=1
243	1	SwissProt	ECHB_HUMAN	32	51547	2	2	2	2	0.18	Trifunctional enzyme subunit beta, mitochondrial OS=Homo sapiens GN=HADHB PE=1 SV=3
254	1	SwissProt	SL9A6_HUMAN	29	74627	3	3	2	2	0.12	Sodium/hydrogen exchanger 6 OS=Homo sapiens GN=SLC9A6 PE=1 SV=2
269	1	SwissProt	KIF11_HUMAN	27	120111	2	2	2	2	0.07	Kinesin-like protein KIF11 OS=Homo sapiens GN=KIF11 PE=1 SV=2
270	1	SwissProt	ACLY_HUMAN	26	121674	2	2	2	2	0.07	ATP-citrate synthase OS=Homo sapiens GN=ACLY PE=1 SV=3
274	1	SwissProt	XPO1_HUMAN	25	124447	2	2	2	2	0.07	Exportin-1 OS=Homo sapiens GN=XPO1 PE=1 SV=1
284	1	SwissProt	S10A7_HUMAN	23	11578	2	2	2	2	1.04	Protein S100-A7 OS=Homo sapiens GN=S100A7 PE=1 SV=4
315	1	SwissProt	F234A_HUMAN	19	60249	2	2	2	2	0.15	Protein FAM234A OS=Homo sapiens GN=FAM234A PE=1 SV=1

## Sheet: Replicate 1_PltB-S35A toxin
Family	Member	Database	Accession	Score	Mass	Num. of matches	Num. of significant matches	Num. of sequences	Num. of significant sequences	emPAI	Description
1	1	SwissProt	K2C1_HUMAN	3471	66170	87	87	29	29	5.83	Keratin, type II cytoskeletal 1 OS=Homo sapiens GN=KRT1 PE=1 SV=6
1	2	SwissProt	K22E_HUMAN	1160	65678	41	41	22	22	3.4	Keratin, type II cytoskeletal 2 epidermal OS=Homo sapiens GN=KRT2 PE=1 SV=2
1	3	SwissProt	K2C6A_HUMAN	480	60293	24	24	15	15	1.87	Keratin, type II cytoskeletal 6A OS=Homo sapiens GN=KRT6A PE=1 SV=3
1	4	SwissProt	K2C5_HUMAN	474	62568	19	19	11	11	1.1	Keratin, type II cytoskeletal 5 OS=Homo sapiens GN=KRT5 PE=1 SV=3
2	1	SwissProt	K1C9_HUMAN	2297	62255	58	58	22	22	5.27	Keratin, type I cytoskeletal 9 OS=Homo sapiens GN=KRT9 PE=1 SV=3
2	2	SwissProt	K1C10_HUMAN	1918	59020	57	57	26	26	7.59	Keratin, type I cytoskeletal 10 OS=Homo sapiens GN=KRT10 PE=1 SV=6
2	3	SwissProt	K1C14_HUMAN	565	51872	20	20	14	14	2.13	Keratin, type I cytoskeletal 14 OS=Homo sapiens GN=KRT14 PE=1 SV=4
2	4	SwissProt	K1C16_HUMAN	538	51578	18	18	13	13	1.9	Keratin, type I cytoskeletal 16 OS=Homo sapiens GN=KRT16 PE=1 SV=4
2	5	SwissProt	K1C17_HUMAN	188	48361	7	7	5	5	0.55	Keratin, type I cytoskeletal 17 OS=Homo sapiens GN=KRT17 PE=1 SV=2
3	1	SwissProt	ECE1_HUMAN	1557	87906	55	55	16	16	1.27	Endothelin-converting enzyme 1 OS=Homo sapiens GN=ECE1 PE=1 SV=2
4	1	SwissProt	LAMP2_HUMAN	1304	45503	38	38	5	5	0.59	Lysosome-associated membrane glycoprotein 2 OS=Homo sapiens GN=LAMP2 PE=1 SV=2
5	1	SwissProt	TBA1B_HUMAN	998	50804	31	31	12	12	1.71	Tubulin alpha-1B chain OS=Homo sapiens GN=TUBA1B PE=1 SV=1
6	1	SwissProt	LCAP_HUMAN	934	117787	36	36	19	19	1.13	Leucyl-cystinyl aminopeptidase OS=Homo sapiens GN=LNPEP PE=1 SV=3
7	1	SwissProt	TBB5_HUMAN	819	50095	28	28	16	16	3.57	Tubulin beta chain OS=Homo sapiens GN=TUBB PE=1 SV=2
7	2	SwissProt	TBB4B_HUMAN	685	50255	26	26	15	15	3.18	Tubulin beta-4B chain OS=Homo sapiens GN=TUBB4B PE=1 SV=1
8	1	SwissProt	PTPRA_HUMAN	814	91455	28	28	15	15	1.01	Receptor-type tyrosine-protein phosphatase alpha OS=Homo sapiens GN=PTPRA PE=1 SV=2
9	1	SwissProt	B3A2_HUMAN	762	137493	28	28	17	17	0.74	Anion exchange protein 2 OS=Homo sapiens GN=SLC4A2 PE=1 SV=4
10	1	SwissProt	LAMP1_HUMAN	724	45367	18	18	6	6	0.75	Lysosome-associated membrane glycoprotein 1 OS=Homo sapiens GN=LAMP1 PE=1 SV=3
11	1	SwissProt	LRC8A_HUMAN	634	95051	23	23	14	14	0.87	Volume-regulated anion channel subunit LRRC8A OS=Homo sapiens GN=LRRC8A PE=1 SV=1
12	1	SwissProt	S4A7_HUMAN	591	137098	20	20	10	10	0.41	Sodium bicarbonate cotransporter 3 OS=Homo sapiens GN=SLC4A7 PE=1 SV=2
13	1	SwissProt	K1549_HUMAN	530	211253	20	20	12	12	0.27	UPF0606 protein KIAA1549 OS=Homo sapiens GN=KIAA1549 PE=1 SV=4
14	1	SwissProt	LRC8C_HUMAN	526	93359	15	15	7	7	0.37	Volume-regulated anion channel subunit LRRC8C OS=Homo sapiens GN=LRRC8C PE=1 SV=2
14	2	SwissProt	LRC8E_HUMAN	81	91387	6	6	5	5	0.26	Volume-regulated anion channel subunit LRRC8E OS=Homo sapiens GN=LRRC8E PE=1 SV=2
15	1	SwissProt	CLCN7_HUMAN	501	89136	22	22	11	11	0.86	H(+)/Cl(-) exchange transporter 7 OS=Homo sapiens GN=CLCN7 PE=1 SV=2
16	1	SwissProt	ATPB_HUMAN	495	56525	16	16	11	11	1.46	ATP synthase subunit beta, mitochondrial OS=Homo sapiens GN=ATP5B PE=1 SV=3
17	1	SwissProt	LRP1_HUMAN	391	523150	12	12	7	7	0.06	Prolow-density lipoprotein receptor-related protein 1 OS=Homo sapiens GN=LRP1 PE=1 SV=2
18	1	SwissProt	1433E_HUMAN	376	29326	13	13	4	4	0.77	14-3-3 protein epsilon OS=Homo sapiens GN=YWHAE PE=1 SV=1
18	2	SwissProt	1433T_HUMAN	208	28032	9	9	4	4	0.82	14-3-3 protein theta OS=Homo sapiens GN=YWHAQ PE=1 SV=1
18	3	SwissProt	1433B_HUMAN	174	28179	7	7	2	2	0.35	14-3-3 protein beta/alpha OS=Homo sapiens GN=YWHAB PE=1 SV=3
19	1	SwissProt	AGRL2_HUMAN	368	165468	15	15	11	11	0.33	Adhesion G protein-coupled receptor L2 OS=Homo sapiens GN=ADGRL2 PE=1 SV=2
20	1	SwissProt	ERP44_HUMAN	367	47341	11	11	6	6	0.71	Endoplasmic reticulum resident protein 44 OS=Homo sapiens GN=ERP44 PE=1 SV=1
21	1	SwissProt	IGF1R_HUMAN	366	157202	13	13	10	10	0.31	Insulin-like growth factor 1 receptor OS=Homo sapiens GN=IGF1R PE=1 SV=1
21	2	SwissProt	INSR_HUMAN	292	158912	11	11	8	8	0.24	Insulin receptor OS=Homo sapiens GN=INSR PE=1 SV=4
22	1	SwissProt	PODXL_HUMAN	360	59055	14	14	6	6	0.65	Podocalyxin OS=Homo sapiens GN=PODXL PE=1 SV=2
23	1	SwissProt	NHRF2_HUMAN	352	37619	13	13	6	6	0.96	Na(+)/H(+) exchange regulatory cofactor NHE-RF2 OS=Homo sapiens GN=SLC9A3R2 PE=1 SV=2
24	1	SwissProt	LDLR_HUMAN	345	98906	11	11	6	6	0.29	Low-density lipoprotein receptor OS=Homo sapiens GN=LDLR PE=1 SV=1
25	1	SwissProt	ACTB_HUMAN	332	42052	15	15	8	8	1.23	Actin, cytoplasmic 1 OS=Homo sapiens GN=ACTB PE=1 SV=1
25	2	SwissProt	ACTA_HUMAN	201	42381	10	10	5	5	0.82	Actin, aortic smooth muscle OS=Homo sapiens GN=ACTA2 PE=1 SV=1
26	1	SwissProt	NICA_HUMAN	328	79103	7	7	3	3	0.17	Nicastrin OS=Homo sapiens GN=NCSTN PE=1 SV=2
27	1	SwissProt	VPP1_HUMAN	324	97148	11	11	7	7	0.48	V-type proton ATPase 116 kDa subunit a isoform 1 OS=Homo sapiens GN=ATP6V0A1 PE=1 SV=3
28	1	SwissProt	ITB1_HUMAN	320	91664	8	8	6	6	0.32	Integrin beta-1 OS=Homo sapiens GN=ITGB1 PE=1 SV=2
29	1	SwissProt	K319L_HUMAN	319	116669	8	8	5	5	0.2	Dyslexia-associated protein KIAA0319-like protein OS=Homo sapiens GN=KIAA0319L PE=1 SV=2
30	1	SwissProt	CH60_HUMAN	313	61187	7	7	7	7	0.62	60 kDa heat shock protein, mitochondrial OS=Homo sapiens GN=HSPD1 PE=1 SV=2
31	1	SwissProt	EF1A1_HUMAN	310	50451	12	12	4	4	0.4	Elongation factor 1-alpha 1 OS=Homo sapiens GN=EEF1A1 PE=1 SV=1
32	1	SwissProt	OSTM1_HUMAN	299	38031	7	7	2	2	0.25	Osteopetrosis-associated transmembrane protein 1 OS=Homo sapiens GN=OSTM1 PE=1 SV=1
33	1	SwissProt	S39AE_HUMAN	299	54918	8	8	3	3	0.26	Zinc transporter ZIP14 OS=Homo sapiens GN=SLC39A14 PE=1 SV=3
34	1	SwissProt	HS90B_HUMAN	276	83554	11	11	8	8	0.5	Heat shock protein HSP 90-beta OS=Homo sapiens GN=HSP90AB1 PE=1 SV=4
34	2	SwissProt	HS90A_HUMAN	254	85006	10	10	7	7	0.42	Heat shock protein HSP 90-alpha OS=Homo sapiens GN=HSP90AA1 PE=1 SV=5
34	3	SwissProt	ENPL_HUMAN	66	92696	2	2	2	2	0.1	Endoplasmin OS=Homo sapiens GN=HSP90B1 PE=1 SV=1
35	1	SwissProt	ATPA_HUMAN	269	59828	8	8	6	6	0.53	ATP synthase subunit alpha, mitochondrial OS=Homo sapiens GN=ATP5A1 PE=1 SV=1
36	1	SwissProt	PTPRJ_HUMAN	265	147048	9	9	7	7	0.26	Receptor-type tyrosine-protein phosphatase eta OS=Homo sapiens GN=PTPRJ PE=1 SV=3
37	1	SwissProt	MEP50_HUMAN	252	37442	10	10	7	7	1.2	Methylosome protein 50 OS=Homo sapiens GN=WDR77 PE=1 SV=1
38	1	SwissProt	S12A7_HUMAN	237	120283	6	6	5	5	0.19	Solute carrier family 12 member 7 OS=Homo sapiens GN=SLC12A7 PE=1 SV=3
39	1	SwissProt	G3P_HUMAN	236	36201	7	7	5	5	0.79	Glyceraldehyde-3-phosphate dehydrogenase OS=Homo sapiens GN=GAPDH PE=1 SV=3
40	1	SwissProt	COPT1_HUMAN	218	21190	8	8	2	2	1.2	High affinity copper uptake protein 1 OS=Homo sapiens GN=SLC31A1 PE=1 SV=1
41	1	SwissProt	HSP7C_HUMAN	208	71082	7	7	5	5	0.35	Heat shock cognate 71 kDa protein OS=Homo sapiens GN=HSPA8 PE=1 SV=1
42	1	SwissProt	CLCN3_HUMAN	179	91934	5	5	3	3	0.15	H(+)/Cl(-) exchange transporter 3 OS=Homo sapiens GN=CLCN3 PE=1 SV=2
43	1	SwissProt	KVD26_HUMAN	179	13403	3	3	2	2	0.85	Immunoglobulin kappa variable 2D-26 OS=Homo sapiens GN=IGKV2D-26 PE=3 SV=1
44	1	SwissProt	PPAL_HUMAN	171	48713	5	5	5	5	0.54	Lysosomal acid phosphatase OS=Homo sapiens GN=ACP2 PE=1 SV=3
45	1	SwissProt	ANM5_HUMAN	171	73322	6	6	6	6	0.41	Protein arginine N-methyltransferase 5 OS=Homo sapiens GN=PRMT5 PE=1 SV=4
46	1	SwissProt	ECHA_HUMAN	165	83688	11	11	9	9	0.58	Trifunctional enzyme subunit alpha, mitochondrial OS=Homo sapiens GN=HADHA PE=1 SV=2
47	1	SwissProt	RO52_HUMAN	163	55162	6	6	4	4	0.47	E3 ubiquitin-protein ligase TRIM21 OS=Homo sapiens GN=TRIM21 PE=1 SV=1
48	1	SwissProt	NPTN_HUMAN	159	44702	4	4	2	2	0.21	Neuroplastin OS=Homo sapiens GN=NPTN PE=1 SV=2
49	1	SwissProt	ITA5_HUMAN	158	115605	3	3	3	3	0.12	Integrin alpha-5 OS=Homo sapiens GN=ITGA5 PE=1 SV=2
50	1	SwissProt	PHB2_HUMAN	158	33276	5	5	3	3	0.46	Prohibitin-2 OS=Homo sapiens GN=PHB2 PE=1 SV=2
51	1	SwissProt	PPM1B_HUMAN	153	53180	8	8	6	6	0.61	Protein phosphatase 1B OS=Homo sapiens GN=PPM1B PE=1 SV=1
53	1	SwissProt	ADT2_HUMAN	149	33059	5	5	3	3	0.46	ADP/ATP translocase 2 OS=Homo sapiens GN=SLC25A5 PE=1 SV=7
53	2	SwissProt	ADT3_HUMAN	145	33073	5	5	4	4	0.66	ADP/ATP translocase 3 OS=Homo sapiens GN=SLC25A6 PE=1 SV=4
54	1	SwissProt	SERA_HUMAN	147	57356	6	6	3	3	0.25	D-3-phosphoglycerate dehydrogenase OS=Homo sapiens GN=PHGDH PE=1 SV=4
55	1	SwissProt	EF2_HUMAN	137	96246	5	5	3	3	0.14	Elongation factor 2 OS=Homo sapiens GN=EEF2 PE=1 SV=4
56	1	SwissProt	AAAT_HUMAN	137	57018	7	7	4	4	0.35	Neutral amino acid transporter B(0) OS=Homo sapiens GN=SLC1A5 PE=1 SV=2
57	1	SwissProt	MCLN1_HUMAN	132	66120	4	4	2	2	0.14	Mucolipin-1 OS=Homo sapiens GN=MCOLN1 PE=1 SV=1
58	1	SwissProt	HS71A_HUMAN	132	70294	4	4	3	3	0.2	Heat shock 70 kDa protein 1A OS=Homo sapiens GN=HSPA1A PE=1 SV=1
59	1	SwissProt	S38A2_HUMAN	132	56332	3	3	2	2	0.16	Sodium-coupled neutral amino acid transporter 2 OS=Homo sapiens GN=SLC38A2 PE=1 SV=2
60	1	SwissProt	TXD12_HUMAN	129	19365	4	4	4	4	1.37	Thioredoxin domain-containing protein 12 OS=Homo sapiens GN=TXNDC12 PE=1 SV=1
61	1	SwissProt	ENOA_HUMAN	126	47481	3	3	3	3	0.31	Alpha-enolase OS=Homo sapiens GN=ENO1 PE=1 SV=2
62	1	SwissProt	VA0D1_HUMAN	121	40759	4	4	4	4	0.51	V-type proton ATPase subunit d 1 OS=Homo sapiens GN=ATP6V0D1 PE=1 SV=1
63	1	SwissProt	STK38_HUMAN	112	54498	4	4	3	3	0.26	Serine/threonine-protein kinase 38 OS=Homo sapiens GN=STK38 PE=1 SV=1
64	1	SwissProt	KIF11_HUMAN	112	120111	6	6	4	4	0.15	Kinesin-like protein KIF11 OS=Homo sapiens GN=KIF11 PE=1 SV=2
65	1	SwissProt	TCPG_HUMAN	107	61066	3	3	3	3	0.23	T-complex protein 1 subunit gamma OS=Homo sapiens GN=CCT3 PE=1 SV=4
66	1	SwissProt	ENPP1_HUMAN	105	107024	4	4	4	4	0.17	Ectonucleotide pyrophosphatase/phosphodiesterase family member 1 OS=Homo sapiens GN=ENPP1 PE=1 SV=2
67	1	SwissProt	RL10A_HUMAN	105	24987	4	4	4	4	0.96	60S ribosomal protein L10a OS=Homo sapiens GN=RPL10A PE=1 SV=2
68	1	SwissProt	DAG1_HUMAN	104	97723	4	4	3	3	0.14	Dystroglycan OS=Homo sapiens GN=DAG1 PE=1 SV=2
70	1	SwissProt	S10A7_HUMAN	103	11578	6	6	3	3	1.91	Protein S100-A7 OS=Homo sapiens GN=S100A7 PE=1 SV=4
71	1	SwissProt	RLA2_HUMAN	101	11658	3	3	2	2	1.03	60S acidic ribosomal protein P2 OS=Homo sapiens GN=RPLP2 PE=1 SV=1
72	1	SwissProt	PXDC2_HUMAN	101	60116	2	2	2	2	0.15	Plexin domain-containing protein 2 OS=Homo sapiens GN=PLXDC2 PE=1 SV=1
73	1	SwissProt	IMB1_HUMAN	100	98420	3	3	3	3	0.14	Importin subunit beta-1 OS=Homo sapiens GN=KPNB1 PE=1 SV=2
75	1	SwissProt	GRP75_HUMAN	96	73920	2	2	2	2	0.12	Stress-70 protein, mitochondrial OS=Homo sapiens GN=HSPA9 PE=1 SV=2
76	1	SwissProt	NPC1_HUMAN	95	144868	4	4	3	3	0.09	Niemann-Pick C1 protein OS=Homo sapiens GN=NPC1 PE=1 SV=2
78	1	SwissProt	IGKC_HUMAN	92	11929	4	4	2	2	1	Immunoglobulin kappa constant OS=Homo sapiens GN=IGKC PE=1 SV=2
79	1	SwissProt	ARF1_HUMAN	90	20741	2	2	2	2	0.5	ADP-ribosylation factor 1 OS=Homo sapiens GN=ARF1 PE=1 SV=2
81	1	SwissProt	F1711_HUMAN	86	98477	5	5	4	4	0.19	Protein FAM171A1 OS=Homo sapiens GN=FAM171A1 PE=1 SV=1
81	2	SwissProt	F1712_HUMAN	35	87723	2	2	2	2	0.1	Protein FAM171A2 OS=Homo sapiens GN=FAM171A2 PE=1 SV=1
83	1	SwissProt	CBPD_HUMAN	85	153919	2	2	2	2	0.06	Carboxypeptidase D OS=Homo sapiens GN=CPD PE=1 SV=2
84	1	SwissProt	C1QBP_HUMAN	85	31742	2	2	2	2	0.3	Complement component 1 Q subcomponent-binding protein, mitochondrial OS=Homo sapiens GN=C1QBP PE=1 SV=1
85	1	SwissProt	NIF3L_HUMAN	84	42341	3	3	2	2	0.22	NIF3-like protein 1 OS=Homo sapiens GN=NIF3L1 PE=1 SV=2
86	1	SwissProt	BASI_HUMAN	83	42573	4	4	2	2	0.35	Basigin OS=Homo sapiens GN=BSG PE=1 SV=2
87	1	SwissProt	ENPP4_HUMAN	82	52007	4	4	3	3	0.28	Bis(5'-adenosyl)-triphosphatase ENPP4 OS=Homo sapiens GN=ENPP4 PE=1 SV=3
88	1	SwissProt	IF4A1_HUMAN	78	46353	2	2	2	2	0.2	Eukaryotic initiation factor 4A-I OS=Homo sapiens GN=EIF4A1 PE=1 SV=1
89	1	SwissProt	KCRB_HUMAN	77	42902	2	2	2	2	0.22	Creatine kinase B-type OS=Homo sapiens GN=CKB PE=1 SV=1
90	1	SwissProt	IGG1_HUMAN	75	49926	2	2	2	2	0.18	Immunoglobulin gamma-1 heavy chain OS=Homo sapiens PE=1 SV=1
91	1	SwissProt	SL9A6_HUMAN	74	74627	3	3	2	2	0.12	Sodium/hydrogen exchanger 6 OS=Homo sapiens GN=SLC9A6 PE=1 SV=2
92	1	SwissProt	RS19_HUMAN	74	16051	4	4	3	3	1.17	40S ribosomal protein S19 OS=Homo sapiens GN=RPS19 PE=1 SV=2
93	1	SwissProt	CH10_HUMAN	74	10925	2	2	2	2	1.13	10 kDa heat shock protein, mitochondrial OS=Homo sapiens GN=HSPE1 PE=1 SV=2
95	1	SwissProt	RS3_HUMAN	73	26842	4	4	3	3	0.6	40S ribosomal protein S3 OS=Homo sapiens GN=RPS3 PE=1 SV=2
96	1	SwissProt	DDB1_HUMAN	73	128142	2	2	2	2	0.07	DNA damage-binding protein 1 OS=Homo sapiens GN=DDB1 PE=1 SV=1
98	1	SwissProt	AMRP_HUMAN	72	41441	2	2	2	2	0.23	Alpha-2-macroglobulin receptor-associated protein OS=Homo sapiens GN=LRPAP1 PE=1 SV=1
99	1	SwissProt	RS12_HUMAN	71	14905	2	2	2	2	0.75	40S ribosomal protein S12 OS=Homo sapiens GN=RPS12 PE=1 SV=3
101	1	SwissProt	KPRP_HUMAN	71	67172	2	2	2	2	0.13	Keratinocyte proline-rich protein OS=Homo sapiens GN=KPRP PE=1 SV=1
103	1	SwissProt	PHB_HUMAN	70	29843	3	3	2	2	0.33	Prohibitin OS=Homo sapiens GN=PHB PE=1 SV=1
106	1	SwissProt	QCR2_HUMAN	68	48584	2	2	2	2	0.19	Cytochrome b-c1 complex subunit 2, mitochondrial OS=Homo sapiens GN=UQCRC2 PE=1 SV=3
108	1	SwissProt	TCPH_HUMAN	66	59842	2	2	2	2	0.15	T-complex protein 1 subunit eta OS=Homo sapiens GN=CCT7 PE=1 SV=2
111	1	SwissProt	LRC4B_HUMAN	65	77298	3	3	3	3	0.18	Leucine-rich repeat-containing protein 4B OS=Homo sapiens GN=LRRC4B PE=2 SV=3
112	1	SwissProt	COL12_HUMAN	65	82035	2	2	2	2	0.11	Collectin-12 OS=Homo sapiens GN=COLEC12 PE=1 SV=3
116	1	SwissProt	DHX9_HUMAN	62	142181	2	2	2	2	0.06	ATP-dependent RNA helicase A OS=Homo sapiens GN=DHX9 PE=1 SV=4
120	1	SwissProt	LRP8_HUMAN	59	109157	2	2	2	2	0.08	Low-density lipoprotein receptor-related protein 8 OS=Homo sapiens GN=LRP8 PE=1 SV=4
122	1	SwissProt	RS25_HUMAN	56	13791	3	3	2	2	0.82	40S ribosomal protein S25 OS=Homo sapiens GN=RPS25 PE=1 SV=1
129	1	SwissProt	MIF_HUMAN	54	12639	2	2	2	2	0.92	Macrophage migration inhibitory factor OS=Homo sapiens GN=MIF PE=1 SV=4
133	1	SwissProt	RS10_HUMAN	53	18886	2	2	2	2	0.56	40S ribosomal protein S10 OS=Homo sapiens GN=RPS10 PE=1 SV=1
134	1	SwissProt	PABP1_HUMAN	53	70854	2	2	2	2	0.13	Polyadenylate-binding protein 1 OS=Homo sapiens GN=PABPC1 PE=1 SV=2
135	1	SwissProt	FPRP_HUMAN	51	99464	2	2	2	2	0.09	Prostaglandin F2 receptor negative regulator OS=Homo sapiens GN=PTGFRN PE=1 SV=2
139	1	SwissProt	EFC14_HUMAN	50	55339	2	2	2	2	0.17	EF-hand calcium-binding domain-containing protein 14 OS=Homo sapiens GN=EFCAB14 PE=1 SV=1
140	1	SwissProt	AT1A1_HUMAN	50	114135	2	2	2	2	0.08	Sodium/potassium-transporting ATPase subunit alpha-1 OS=Homo sapiens GN=ATP1A1 PE=1 SV=1
143	1	SwissProt	SMD1_HUMAN	48	13273	2	2	2	2	0.86	Small nuclear ribonucleoprotein Sm D1 OS=Homo sapiens GN=SNRPD1 PE=1 SV=1
148	1	SwissProt	IF5A2_HUMAN	48	17124	3	3	3	3	1.08	Eukaryotic translation initiation factor 5A-2 OS=Homo sapiens GN=EIF5A2 PE=1 SV=3
155	1	SwissProt	CLH1_HUMAN	44	193260	2	2	2	2	0.05	Clathrin heavy chain 1 OS=Homo sapiens GN=CLTC PE=1 SV=5
165	1	SwissProt	MERTK_HUMAN	41	111148	3	3	2	2	0.08	Tyrosine-protein kinase Mer OS=Homo sapiens GN=MERTK PE=1 SV=2
175	1	SwissProt	CK084_HUMAN	38	41297	2	2	2	2	0.23	Uncharacterized protein C11orf84 OS=Homo sapiens GN=C11orf84 PE=1 SV=3
181	1	SwissProt	PSA4_HUMAN	37	29750	2	2	2	2	0.33	Proteasome subunit alpha type-4 OS=Homo sapiens GN=PSMA4 PE=1 SV=1
198	1	SwissProt	IMA1_HUMAN	34	58168	3	3	2	2	0.16	Importin subunit alpha-1 OS=Homo sapiens GN=KPNA2 PE=1 SV=1
204	1	SwissProt	MGRN1_HUMAN	32	61456	2	2	2	2	0.15	E3 ubiquitin-protein ligase MGRN1 OS=Homo sapiens GN=MGRN1 PE=1 SV=2
209	1	SwissProt	ATRN_HUMAN	31	163450	2	2	2	2	0.05	Attractin OS=Homo sapiens GN=ATRN PE=1 SV=2
216	1	SwissProt	CADM1_HUMAN	29	48935	2	2	2	2	0.19	Cell adhesion molecule 1 OS=Homo sapiens GN=CADM1 PE=1 SV=2
219	1	SwissProt	DNJA1_HUMAN	28	45581	2	2	2	2	0.2	DnaJ homolog subfamily A member 1 OS=Homo sapiens GN=DNAJA1 PE=1 SV=2
225	1	SwissProt	LDHB_HUMAN	27	36900	2	2	2	2	0.26	L-lactate dehydrogenase B chain OS=Homo sapiens GN=LDHB PE=1 SV=2
233	1	SwissProt	FLNA_HUMAN	24	283301	2	2	2	2	0.03	Filamin-A OS=Homo sapiens GN=FLNA PE=1 SV=4
234	1	SwissProt	PIP_HUMAN	25	16847	2	2	2	2	0.64	Prolactin-inducible protein OS=Homo sapiens GN=PIP PE=1 SV=1

## Sheet: Replicate 2_WT Toxin
Family	Member	Database	Accession	Score	Mass	Num. of matches	Num. of significant matches	Num. of sequences	Num. of significant sequences	emPAI	Description
1	1	SwissProt	TBA1B_HUMAN	1517	50804	45	45	13	13	1.95	Tubulin alpha-1B chain OS=Homo sapiens GN=TUBA1B PE=1 SV=1
1	2	SwissProt	TBA1A_HUMAN	956	50788	32	32	13	13	1.95	Tubulin alpha-1A chain OS=Homo sapiens GN=TUBA1A PE=1 SV=1
2	1	SwissProt	LAMP2_HUMAN	1464	45503	40	40	5	5	0.59	Lysosome-associated membrane glycoprotein 2 OS=Homo sapiens GN=LAMP2 PE=1 SV=2
3	1	SwissProt	LRP1_HUMAN	1328	523150	55	55	40	40	0.38	Prolow-density lipoprotein receptor-related protein 1 OS=Homo sapiens GN=LRP1 PE=1 SV=2
4	1	SwissProt	AT1A1_HUMAN	1246	114135	35	35	19	19	1.03	Sodium/potassium-transporting ATPase subunit alpha-1 OS=Homo sapiens GN=ATP1A1 PE=1 SV=1
4	2	SwissProt	AT1A3_HUMAN	1002	113102	27	27	13	13	0.63	Sodium/potassium-transporting ATPase subunit alpha-3 OS=Homo sapiens GN=ATP1A3 PE=1 SV=3
5	1	SwissProt	CBPD_HUMAN	1210	153919	44	44	21	21	0.84	Carboxypeptidase D OS=Homo sapiens GN=CPD PE=1 SV=2
6	1	SwissProt	B3A2_HUMAN	1120	137493	34	34	21	21	0.91	Anion exchange protein 2 OS=Homo sapiens GN=SLC4A2 PE=1 SV=4
7	1	SwissProt	TBB4B_HUMAN	1067	50255	42	42	15	15	2.84	Tubulin beta-4B chain OS=Homo sapiens GN=TUBB4B PE=1 SV=1
7	2	SwissProt	TBB3_HUMAN	921	50856	35	35	11	11	1.71	Tubulin beta-3 chain OS=Homo sapiens GN=TUBB3 PE=1 SV=2
8	1	SwissProt	ECE1_HUMAN	1047	87906	37	37	11	11	0.7	Endothelin-converting enzyme 1 OS=Homo sapiens GN=ECE1 PE=1 SV=2
9	1	SwissProt	LCAP_HUMAN	985	117787	26	26	14	14	0.72	Leucyl-cystinyl aminopeptidase OS=Homo sapiens GN=LNPEP PE=1 SV=3
10	1	SwissProt	LAMP1_HUMAN	930	45367	24	24	5	5	0.59	Lysosome-associated membrane glycoprotein 1 OS=Homo sapiens GN=LAMP1 PE=1 SV=3
11	1	SwissProt	K2C1_HUMAN	901	66170	28	28	17	17	1.97	Keratin, type II cytoskeletal 1 OS=Homo sapiens GN=KRT1 PE=1 SV=6
11	2	SwissProt	K22E_HUMAN	349	65678	10	10	7	7	0.57	Keratin, type II cytoskeletal 2 epidermal OS=Homo sapiens GN=KRT2 PE=1 SV=2
12	1	SwissProt	AAAT_HUMAN	790	57018	21	21	7	7	0.68	Neutral amino acid transporter B(0) OS=Homo sapiens GN=SLC1A5 PE=1 SV=2
13	1	SwissProt	ECHA_HUMAN	789	83688	27	27	16	16	1.25	Trifunctional enzyme subunit alpha, mitochondrial OS=Homo sapiens GN=HADHA PE=1 SV=2
14	1	SwissProt	PTPRA_HUMAN	748	91455	21	21	11	11	0.67	Receptor-type tyrosine-protein phosphatase alpha OS=Homo sapiens GN=PTPRA PE=1 SV=2
15	1	SwissProt	LRC8A_HUMAN	715	95051	25	25	11	11	0.63	Volume-regulated anion channel subunit LRRC8A OS=Homo sapiens GN=LRRC8A PE=1 SV=1
16	1	SwissProt	S39AE_HUMAN	624	54918	17	17	4	4	0.36	Zinc transporter ZIP14 OS=Homo sapiens GN=SLC39A14 PE=1 SV=3
17	1	SwissProt	AGRL2_HUMAN	567	165468	15	15	10	10	0.29	Adhesion G protein-coupled receptor L2 OS=Homo sapiens GN=ADGRL2 PE=1 SV=2
17	2	SwissProt	AGRL1_HUMAN	56	164609	2	2	2	2	0.05	Adhesion G protein-coupled receptor L1 OS=Homo sapiens GN=ADGRL1 PE=1 SV=1
18	1	SwissProt	S4A7_HUMAN	493	137098	13	13	6	6	0.2	Sodium bicarbonate cotransporter 3 OS=Homo sapiens GN=SLC4A7 PE=1 SV=2
19	1	SwissProt	ANM5_HUMAN	447	73322	18	18	11	11	0.89	Protein arginine N-methyltransferase 5 OS=Homo sapiens GN=PRMT5 PE=1 SV=4
20	1	SwissProt	CLCN7_HUMAN	438	89136	17	17	9	9	0.61	H(+)/Cl(-) exchange transporter 7 OS=Homo sapiens GN=CLCN7 PE=1 SV=2
21	1	SwissProt	LRC8C_HUMAN	436	93359	14	14	6	6	0.31	Volume-regulated anion channel subunit LRRC8C OS=Homo sapiens GN=LRRC8C PE=1 SV=2
21	2	SwissProt	LRC8E_HUMAN	325	91387	13	13	8	8	0.45	Volume-regulated anion channel subunit LRRC8E OS=Homo sapiens GN=LRRC8E PE=1 SV=2
22	1	SwissProt	MEP50_HUMAN	431	37442	18	18	9	9	1.76	Methylosome protein 50 OS=Homo sapiens GN=WDR77 PE=1 SV=1
23	1	SwissProt	PHB2_HUMAN	427	33276	13	13	7	7	1.42	Prohibitin-2 OS=Homo sapiens GN=PHB2 PE=1 SV=2
24	1	SwissProt	INSR_HUMAN	417	158912	16	16	10	10	0.31	Insulin receptor OS=Homo sapiens GN=INSR PE=1 SV=4
24	2	SwissProt	IGF1R_HUMAN	410	157202	15	15	10	10	0.31	Insulin-like growth factor 1 receptor OS=Homo sapiens GN=IGF1R PE=1 SV=1
25	1	SwissProt	LDLR_HUMAN	414	98906	15	15	10	10	0.54	Low-density lipoprotein receptor OS=Homo sapiens GN=LDLR PE=1 SV=1
26	1	SwissProt	4F2_HUMAN	400	68180	18	18	13	13	1.24	4F2 cell-surface antigen heavy chain OS=Homo sapiens GN=SLC3A2 PE=1 SV=3
27	1	SwissProt	NICA_HUMAN	394	79103	13	13	4	4	0.24	Nicastrin OS=Homo sapiens GN=NCSTN PE=1 SV=2
28	1	SwissProt	DAG1_HUMAN	383	97723	20	20	9	9	0.48	Dystroglycan OS=Homo sapiens GN=DAG1 PE=1 SV=2
29	1	SwissProt	BASI_HUMAN	379	42573	13	13	6	6	1	Basigin OS=Homo sapiens GN=BSG PE=1 SV=2
30	1	SwissProt	EAA1_HUMAN	373	59705	8	8	4	4	0.33	Excitatory amino acid transporter 1 OS=Homo sapiens GN=SLC1A3 PE=1 SV=1
31	1	SwissProt	ENPP1_HUMAN	369	107024	10	10	5	5	0.22	Ectonucleotide pyrophosphatase/phosphodiesterase family member 1 OS=Homo sapiens GN=ENPP1 PE=1 SV=2
32	1	SwissProt	PDXL2_HUMAN	361	65435	9	9	3	3	0.21	Podocalyxin-like protein 2 OS=Homo sapiens GN=PODXL2 PE=1 SV=1
33	1	SwissProt	ITB1_HUMAN	348	91664	13	13	8	8	0.45	Integrin beta-1 OS=Homo sapiens GN=ITGB1 PE=1 SV=2
34	1	SwissProt	SERA_HUMAN	305	57356	14	14	8	8	0.94	D-3-phosphoglycerate dehydrogenase OS=Homo sapiens GN=PHGDH PE=1 SV=4
35	1	SwissProt	PRKDC_HUMAN	304	473749	14	14	13	13	0.12	DNA-dependent protein kinase catalytic subunit OS=Homo sapiens GN=PRKDC PE=1 SV=3
36	1	SwissProt	TXD12_HUMAN	300	19365	8	8	4	4	1.37	Thioredoxin domain-containing protein 12 OS=Homo sapiens GN=TXNDC12 PE=1 SV=1
37	1	SwissProt	K1549_HUMAN	295	211253	18	18	12	12	0.27	UPF0606 protein KIAA1549 OS=Homo sapiens GN=KIAA1549 PE=1 SV=4
38	1	SwissProt	MUC18_HUMAN	291	72532	10	10	8	8	0.6	Cell surface glycoprotein MUC18 OS=Homo sapiens GN=MCAM PE=1 SV=2
39	1	SwissProt	ADT2_HUMAN	290	33059	11	11	7	7	1.77	ADP/ATP translocase 2 OS=Homo sapiens GN=SLC25A5 PE=1 SV=7
39	2	SwissProt	ADT3_HUMAN	206	33073	10	10	6	6	1.15	ADP/ATP translocase 3 OS=Homo sapiens GN=SLC25A6 PE=1 SV=4
40	1	SwissProt	COPT1_HUMAN	278	21190	11	11	3	3	1.68	High affinity copper uptake protein 1 OS=Homo sapiens GN=SLC31A1 PE=1 SV=1
41	1	SwissProt	CLCN3_HUMAN	274	91934	9	9	6	6	0.32	H(+)/Cl(-) exchange transporter 3 OS=Homo sapiens GN=CLCN3 PE=1 SV=2
41	2	SwissProt	CLCN5_HUMAN	93	84062	4	4	4	4	0.22	H(+)/Cl(-) exchange transporter 5 OS=Homo sapiens GN=CLCN5 PE=1 SV=1
42	1	SwissProt	SURF4_HUMAN	271	30602	5	5	3	3	0.51	Surfeit locus protein 4 OS=Homo sapiens GN=SURF4 PE=1 SV=3
43	1	SwissProt	IMB1_HUMAN	260	98420	9	9	6	6	0.3	Importin subunit beta-1 OS=Homo sapiens GN=KPNB1 PE=1 SV=2
44	1	SwissProt	K1C10_HUMAN	259	59020	8	8	6	6	0.54	Keratin, type I cytoskeletal 10 OS=Homo sapiens GN=KRT10 PE=1 SV=6
45	1	SwissProt	PHB_HUMAN	259	29843	10	10	7	7	1.68	Prohibitin OS=Homo sapiens GN=PHB PE=1 SV=1
46	1	SwissProt	S12A2_HUMAN	253	132048	10	10	8	8	0.29	Solute carrier family 12 member 2 OS=Homo sapiens GN=SLC12A2 PE=1 SV=1
47	1	SwissProt	AMRP_HUMAN	251	41441	11	11	7	7	1.04	Alpha-2-macroglobulin receptor-associated protein OS=Homo sapiens GN=LRPAP1 PE=1 SV=1
48	1	SwissProt	S12A7_HUMAN	246	120283	9	9	8	8	0.33	Solute carrier family 12 member 7 OS=Homo sapiens GN=SLC12A7 PE=1 SV=3
49	1	SwissProt	1433E_HUMAN	243	29326	9	9	4	4	0.77	14-3-3 protein epsilon OS=Homo sapiens GN=YWHAE PE=1 SV=1
50	1	SwissProt	ERP44_HUMAN	236	47341	10	10	7	7	0.87	Endoplasmic reticulum resident protein 44 OS=Homo sapiens GN=ERP44 PE=1 SV=1
51	1	SwissProt	KVD26_HUMAN	235	13403	6	6	3	3	1.52	Immunoglobulin kappa variable 2D-26 OS=Homo sapiens GN=IGKV2D-26 PE=3 SV=1
52	1	SwissProt	SLIK5_HUMAN	215	108672	8	8	5	5	0.22	SLIT and NTRK-like protein 5 OS=Homo sapiens GN=SLITRK5 PE=2 SV=2
53	1	SwissProt	HSP7C_HUMAN	213	71082	9	9	8	8	0.61	Heat shock cognate 71 kDa protein OS=Homo sapiens GN=HSPA8 PE=1 SV=1
53	2	SwissProt	HS71A_HUMAN	105	70294	5	5	5	5	0.35	Heat shock 70 kDa protein 1A OS=Homo sapiens GN=HSPA1A PE=1 SV=1
53	3	SwissProt	GRP78_HUMAN	46	72402	3	3	3	3	0.19	78 kDa glucose-regulated protein OS=Homo sapiens GN=HSPA5 PE=1 SV=2
55	1	SwissProt	MPRI_HUMAN	205	281155	14	14	11	11	0.18	Cation-independent mannose-6-phosphate receptor OS=Homo sapiens GN=IGF2R PE=1 SV=3
56	1	SwissProt	NHRF2_HUMAN	204	37619	8	8	4	4	0.57	Na(+)/H(+) exchange regulatory cofactor NHE-RF2 OS=Homo sapiens GN=SLC9A3R2 PE=1 SV=2
57	1	SwissProt	NPC1_HUMAN	204	144868	7	7	6	6	0.19	Niemann-Pick C1 protein OS=Homo sapiens GN=NPC1 PE=1 SV=2
58	1	SwissProt	ITA5_HUMAN	203	115605	4	4	3	3	0.12	Integrin alpha-5 OS=Homo sapiens GN=ITGA5 PE=1 SV=2
59	1	SwissProt	K319L_HUMAN	197	116669	8	8	4	4	0.16	Dyslexia-associated protein KIAA0319-like protein OS=Homo sapiens GN=KIAA0319L PE=1 SV=2
60	1	SwissProt	K1C9_HUMAN	197	62255	7	7	4	4	0.4	Keratin, type I cytoskeletal 9 OS=Homo sapiens GN=KRT9 PE=1 SV=3
61	1	SwissProt	PODXL_HUMAN	197	59055	10	10	6	6	0.54	Podocalyxin OS=Homo sapiens GN=PODXL PE=1 SV=2
62	1	SwissProt	IGKC_HUMAN	194	11929	5	5	2	2	1	Immunoglobulin kappa constant OS=Homo sapiens GN=IGKC PE=1 SV=2
63	1	SwissProt	RRAGC_HUMAN	190	44595	10	10	5	5	0.61	Ras-related GTP-binding protein C OS=Homo sapiens GN=RRAGC PE=1 SV=1
64	1	SwissProt	RRAGA_HUMAN	188	36942	6	6	4	4	0.58	Ras-related GTP-binding protein A OS=Homo sapiens GN=RRAGA PE=1 SV=1
65	1	SwissProt	PPAL_HUMAN	177	48713	10	10	6	6	0.68	Lysosomal acid phosphatase OS=Homo sapiens GN=ACP2 PE=1 SV=3
66	1	SwissProt	S12A4_HUMAN	175	121712	6	6	5	5	0.19	Solute carrier family 12 member 4 OS=Homo sapiens GN=SLC12A4 PE=1 SV=2
68	1	SwissProt	CD276_HUMAN	171	57941	5	5	3	3	0.25	CD276 antigen OS=Homo sapiens GN=CD276 PE=1 SV=1
69	1	SwissProt	KCT2_HUMAN	169	29331	3	3	2	2	0.33	Keratinocyte-associated transmembrane protein 2 OS=Homo sapiens GN=KCT2 PE=1 SV=2
70	1	SwissProt	STK38_HUMAN	168	54498	6	6	4	4	0.36	Serine/threonine-protein kinase 38 OS=Homo sapiens GN=STK38 PE=1 SV=1
70	2	SwissProt	ST38L_HUMAN	55	54196	2	2	2	2	0.17	Serine/threonine-protein kinase 38-like OS=Homo sapiens GN=STK38L PE=1 SV=3
71	1	SwissProt	ATPB_HUMAN	165	56525	6	6	6	6	0.57	ATP synthase subunit beta, mitochondrial OS=Homo sapiens GN=ATP5B PE=1 SV=3
72	1	SwissProt	MCLN1_HUMAN	162	66120	3	3	2	2	0.14	Mucolipin-1 OS=Homo sapiens GN=MCOLN1 PE=1 SV=1
73	1	SwissProt	XPO1_HUMAN	157	124447	5	5	3	3	0.11	Exportin-1 OS=Homo sapiens GN=XPO1 PE=1 SV=1
74	1	SwissProt	GRB2_HUMAN	156	25304	8	8	7	7	2.19	Growth factor receptor-bound protein 2 OS=Homo sapiens GN=GRB2 PE=1 SV=1
75	1	SwissProt	TMEM9_HUMAN	155	21074	3	3	2	2	0.49	Transmembrane protein 9 OS=Homo sapiens GN=TMEM9 PE=1 SV=1
76	1	SwissProt	NPTN_HUMAN	150	44702	6	6	3	3	0.33	Neuroplastin OS=Homo sapiens GN=NPTN PE=1 SV=2
77	1	SwissProt	AGRL3_HUMAN	149	163591	5	5	5	5	0.14	Adhesion G protein-coupled receptor L3 OS=Homo sapiens GN=ADGRL3 PE=1 SV=2
78	1	SwissProt	LTOR3_HUMAN	149	13671	5	5	2	2	0.83	Ragulator complex protein LAMTOR3 OS=Homo sapiens GN=LAMTOR3 PE=1 SV=1
79	1	SwissProt	VPP1_HUMAN	149	97148	5	5	5	5	0.24	V-type proton ATPase 116 kDa subunit a isoform 1 OS=Homo sapiens GN=ATP6V0A1 PE=1 SV=3
80	1	SwissProt	ENPP4_HUMAN	147	52007	4	4	2	2	0.18	Bis(5'-adenosyl)-triphosphatase ENPP4 OS=Homo sapiens GN=ENPP4 PE=1 SV=3
81	1	SwissProt	NAGPA_HUMAN	146	57634	4	4	3	3	0.25	N-acetylglucosamine-1-phosphodiester alpha-N-acetylglucosaminidase OS=Homo sapiens GN=NAGPA PE=1 SV=2
82	1	SwissProt	AT1B3_HUMAN	142	31834	4	4	3	3	0.49	Sodium/potassium-transporting ATPase subunit beta-3 OS=Homo sapiens GN=ATP1B3 PE=1 SV=1
83	1	SwissProt	NRP1_HUMAN	142	104323	5	5	4	4	0.18	Neuropilin-1 OS=Homo sapiens GN=NRP1 PE=1 SV=3
84	1	SwissProt	KIF11_HUMAN	136	120111	5	5	4	4	0.15	Kinesin-like protein KIF11 OS=Homo sapiens GN=KIF11 PE=1 SV=2
85	1	SwissProt	SMD3_HUMAN	132	14021	5	5	2	2	0.81	Small nuclear ribonucleoprotein Sm D3 OS=Homo sapiens GN=SNRPD3 PE=1 SV=1
86	1	SwissProt	GRP75_HUMAN	130	73920	3	3	2	2	0.12	Stress-70 protein, mitochondrial OS=Homo sapiens GN=HSPA9 PE=1 SV=2
87	1	SwissProt	TNPO1_HUMAN	128	103771	4	4	3	3	0.13	Transportin-1 OS=Homo sapiens GN=TNPO1 PE=1 SV=2
88	1	SwissProt	FPRP_HUMAN	128	99464	4	4	3	3	0.14	Prostaglandin F2 receptor negative regulator OS=Homo sapiens GN=PTGFRN PE=1 SV=2
89	1	SwissProt	RO52_HUMAN	123	55162	5	5	5	5	0.47	E3 ubiquitin-protein ligase TRIM21 OS=Homo sapiens GN=TRIM21 PE=1 SV=1
90	1	SwissProt	CADM1_HUMAN	120	48935	5	5	2	2	0.19	Cell adhesion molecule 1 OS=Homo sapiens GN=CADM1 PE=1 SV=2
91	1	SwissProt	CTR1_HUMAN	119	68449	5	5	2	2	0.13	High affinity cationic amino acid transporter 1 OS=Homo sapiens GN=SLC7A1 PE=1 SV=1
92	1	SwissProt	TSN3_HUMAN	117	28797	5	5	3	3	0.55	Tetraspanin-3 OS=Homo sapiens GN=TSPAN3 PE=2 SV=1
93	1	SwissProt	MPCP_HUMAN	116	40525	6	6	4	4	0.52	Phosphate carrier protein, mitochondrial OS=Homo sapiens GN=SLC25A3 PE=1 SV=2
94	1	SwissProt	MA1B1_HUMAN	115	79815	7	7	6	6	0.38	Endoplasmic reticulum mannosyl-oligosaccharide 1,2-alpha-mannosidase OS=Homo sapiens GN=MAN1B1 PE=1 SV=2
95	1	SwissProt	MERTK_HUMAN	115	111148	6	6	6	6	0.26	Tyrosine-protein kinase Mer OS=Homo sapiens GN=MERTK PE=1 SV=2
96	1	SwissProt	H2B1B_HUMAN	115	13942	4	4	2	2	0.81	Histone H2B type 1-B OS=Homo sapiens GN=HIST1H2BB PE=1 SV=2
97	1	SwissProt	HACD3_HUMAN	112	43360	4	4	2	2	0.21	Very-long-chain (3R)-3-hydroxyacyl-CoA dehydratase 3 OS=Homo sapiens GN=HACD3 PE=1 SV=2
98	1	SwissProt	ITA1_HUMAN	110	132304	8	8	7	7	0.25	Integrin alpha-1 OS=Homo sapiens GN=ITGA1 PE=1 SV=2
99	1	SwissProt	ITA6_HUMAN	107	127724	3	3	3	3	0.1	Integrin alpha-6 OS=Homo sapiens GN=ITGA6 PE=1 SV=5
100	1	SwissProt	QPCT_HUMAN	107	40965	3	3	3	3	0.36	Glutaminyl-peptide cyclotransferase OS=Homo sapiens GN=QPCT PE=1 SV=1
101	1	SwissProt	SC5A6_HUMAN	106	69509	4	4	3	3	0.2	Sodium-dependent multivitamin transporter OS=Homo sapiens GN=SLC5A6 PE=2 SV=2
102	1	SwissProt	PXDC2_HUMAN	105	60116	2	2	2	2	0.15	Plexin domain-containing protein 2 OS=Homo sapiens GN=PLXDC2 PE=1 SV=1
103	1	SwissProt	PPM1B_HUMAN	105	53180	3	3	3	3	0.27	Protein phosphatase 1B OS=Homo sapiens GN=PPM1B PE=1 SV=1
104	1	SwissProt	S39AA_HUMAN	104	94928	3	3	2	2	0.09	Zinc transporter ZIP10 OS=Homo sapiens GN=SLC39A10 PE=1 SV=2
106	1	SwissProt	RL12_HUMAN	102	17979	2	2	2	2	0.59	60S ribosomal protein L12 OS=Homo sapiens GN=RPL12 PE=1 SV=1
107	1	SwissProt	MRC2_HUMAN	102	169761	4	4	4	4	0.11	C-type mannose receptor 2 OS=Homo sapiens GN=MRC2 PE=1 SV=2
108	1	SwissProt	SE6L2_HUMAN	102	99038	3	3	2	2	0.09	Seizure 6-like protein 2 OS=Homo sapiens GN=SEZ6L2 PE=1 SV=2
109	1	SwissProt	QSOX2_HUMAN	101	78221	4	4	3	3	0.18	Sulfhydryl oxidase 2 OS=Homo sapiens GN=QSOX2 PE=1 SV=3
110	1	SwissProt	IGG1_HUMAN	101	49926	3	3	2	2	0.18	Immunoglobulin gamma-1 heavy chain OS=Homo sapiens PE=1 SV=1
112	1	SwissProt	VA0D1_HUMAN	96	40759	4	4	4	4	0.51	V-type proton ATPase subunit d 1 OS=Homo sapiens GN=ATP6V0D1 PE=1 SV=1
113	1	SwissProt	TELO2_HUMAN	95	92430	2	2	2	2	0.1	Telomere length regulation protein TEL2 homolog OS=Homo sapiens GN=TELO2 PE=1 SV=2
114	1	SwissProt	CHP1_HUMAN	94	22442	5	5	3	3	0.75	Calcineurin B homologous protein 1 OS=Homo sapiens GN=CHP1 PE=1 SV=3
115	1	SwissProt	EF1A1_HUMAN	93	50451	5	5	5	5	0.52	Elongation factor 1-alpha 1 OS=Homo sapiens GN=EEF1A1 PE=1 SV=1
116	1	SwissProt	SSRA_HUMAN	92	32215	4	4	2	2	0.3	Translocon-associated protein subunit alpha OS=Homo sapiens GN=SSR1 PE=1 SV=3
117	1	SwissProt	HNRPK_HUMAN	87	51230	2	2	2	2	0.18	Heterogeneous nuclear ribonucleoprotein K OS=Homo sapiens GN=HNRNPK PE=1 SV=1
119	1	SwissProt	ATPA_HUMAN	85	59828	2	2	2	2	0.15	ATP synthase subunit alpha, mitochondrial OS=Homo sapiens GN=ATP5A1 PE=1 SV=1
120	1	SwissProt	NDRG3_HUMAN	84	41896	3	3	3	3	0.35	Protein NDRG3 OS=Homo sapiens GN=NDRG3 PE=1 SV=2
121	1	SwissProt	KCTD5_HUMAN	84	26475	3	3	3	3	0.61	BTB/POZ domain-containing protein KCTD5 OS=Homo sapiens GN=KCTD5 PE=1 SV=1
122	1	SwissProt	GNPTG_HUMAN	83	34351	2	2	2	2	0.28	N-acetylglucosamine-1-phosphotransferase subunit gamma OS=Homo sapiens GN=GNPTG PE=1 SV=1
123	1	SwissProt	OSTM1_HUMAN	82	38031	3	3	2	2	0.25	Osteopetrosis-associated transmembrane protein 1 OS=Homo sapiens GN=OSTM1 PE=1 SV=1
124	1	SwissProt	S38A2_HUMAN	82	56332	2	2	2	2	0.16	Sodium-coupled neutral amino acid transporter 2 OS=Homo sapiens GN=SLC38A2 PE=1 SV=2
125	1	SwissProt	DHB12_HUMAN	81	34416	2	2	2	2	0.28	Very-long-chain 3-oxoacyl-CoA reductase OS=Homo sapiens GN=HSD17B12 PE=1 SV=2
127	1	SwissProt	ITA8_HUMAN	80	118654	3	3	3	3	0.11	Integrin alpha-8 OS=Homo sapiens GN=ITGA8 PE=1 SV=3
129	1	SwissProt	LRP8_HUMAN	79	109157	3	3	2	2	0.08	Low-density lipoprotein receptor-related protein 8 OS=Homo sapiens GN=LRP8 PE=1 SV=4
130	1	SwissProt	SMD1_HUMAN	78	13273	5	5	3	3	1.54	Small nuclear ribonucleoprotein Sm D1 OS=Homo sapiens GN=SNRPD1 PE=1 SV=1
131	1	SwissProt	CH60_HUMAN	78	61187	2	2	2	2	0.15	60 kDa heat shock protein, mitochondrial OS=Homo sapiens GN=HSPD1 PE=1 SV=2
132	1	SwissProt	LRC4B_HUMAN	78	77298	2	2	2	2	0.12	Leucine-rich repeat-containing protein 4B OS=Homo sapiens GN=LRRC4B PE=2 SV=3
135	1	SwissProt	PVR_HUMAN	75	45787	6	6	3	3	0.32	Poliovirus receptor OS=Homo sapiens GN=PVR PE=1 SV=2
137	1	SwissProt	CD320_HUMAN	73	29998	3	3	3	3	0.52	CD320 antigen OS=Homo sapiens GN=CD320 PE=1 SV=1
138	1	SwissProt	IF4B_HUMAN	73	69167	7	7	4	4	0.28	Eukaryotic translation initiation factor 4B OS=Homo sapiens GN=EIF4B PE=1 SV=2
139	1	SwissProt	SORT_HUMAN	73	92979	3	3	2	2	0.1	Sortilin OS=Homo sapiens GN=SORT1 PE=1 SV=3
142	1	SwissProt	ACTB_HUMAN	71	42052	7	7	4	4	0.49	Actin, cytoplasmic 1 OS=Homo sapiens GN=ACTB PE=1 SV=1
143	1	SwissProt	CAND1_HUMAN	71	137999	2	2	2	2	0.06	Cullin-associated NEDD8-dissociated protein 1 OS=Homo sapiens GN=CAND1 PE=1 SV=2
146	1	SwissProt	XPO2_HUMAN	69	111145	3	3	2	2	0.08	Exportin-2 OS=Homo sapiens GN=CSE1L PE=1 SV=3
151	1	SwissProt	TCPD_HUMAN	68	58401	3	3	2	2	0.24	T-complex protein 1 subunit delta OS=Homo sapiens GN=CCT4 PE=1 SV=4
151	2	SwissProt	TCPE_HUMAN	30	60089	2	2	2	2	0.15	T-complex protein 1 subunit epsilon OS=Homo sapiens GN=CCT5 PE=1 SV=1
152	1	SwissProt	ECHB_HUMAN	67	51547	3	3	3	3	0.28	Trifunctional enzyme subunit beta, mitochondrial OS=Homo sapiens GN=HADHB PE=1 SV=3
153	1	SwissProt	SATT_HUMAN	67	56087	2	2	2	2	0.16	Neutral amino acid transporter A OS=Homo sapiens GN=SLC1A4 PE=1 SV=1
157	1	SwissProt	NCAM1_HUMAN	66	95370	4	4	3	3	0.14	Neural cell adhesion molecule 1 OS=Homo sapiens GN=NCAM1 PE=1 SV=3
159	1	SwissProt	EMB_HUMAN	65	37314	2	2	2	2	0.25	Embigin OS=Homo sapiens GN=EMB PE=1 SV=1
164	1	SwissProt	EF1G_HUMAN	61	50429	2	2	2	2	0.18	Elongation factor 1-gamma OS=Homo sapiens GN=EEF1G PE=1 SV=3
166	1	SwissProt	NDRG1_HUMAN	61	43264	4	4	3	3	0.34	Protein NDRG1 OS=Homo sapiens GN=NDRG1 PE=1 SV=1
167	1	SwissProt	CB072_HUMAN	60	30918	4	4	4	4	0.72	Uncharacterized protein C2orf72 OS=Homo sapiens GN=C2orf72 PE=1 SV=2
169	1	SwissProt	PTPRG_HUMAN	60	163042	3	3	3	3	0.08	Receptor-type tyrosine-protein phosphatase gamma OS=Homo sapiens GN=PTPRG PE=1 SV=4
170	1	SwissProt	TM87A_HUMAN	59	63788	2	2	2	2	0.14	Transmembrane protein 87A OS=Homo sapiens GN=TMEM87A PE=1 SV=3
171	1	SwissProt	FLRT3_HUMAN	58	73642	3	3	3	3	0.19	Leucine-rich repeat transmembrane protein FLRT3 OS=Homo sapiens GN=FLRT3 PE=1 SV=1
172	1	SwissProt	ATRN_HUMAN	57	163450	2	2	2	2	0.05	Attractin OS=Homo sapiens GN=ATRN PE=1 SV=2
177	1	SwissProt	AT1B1_HUMAN	56	35438	3	3	3	3	0.43	Sodium/potassium-transporting ATPase subunit beta-1 OS=Homo sapiens GN=ATP1B1 PE=1 SV=1
178	1	SwissProt	HBA_HUMAN	55	15305	2	2	2	2	0.72	Hemoglobin subunit alpha OS=Homo sapiens GN=HBA1 PE=1 SV=2
179	1	SwissProt	SORL_HUMAN	54	253798	2	2	2	2	0.03	Sortilin-related receptor OS=Homo sapiens GN=SORL1 PE=1 SV=2
180	1	SwissProt	F1712_HUMAN	54	87723	3	3	2	2	0.1	Protein FAM171A2 OS=Homo sapiens GN=FAM171A2 PE=1 SV=1
180	2	SwissProt	F1711_HUMAN	26	98477	2	2	2	2	0.09	Protein FAM171A1 OS=Homo sapiens GN=FAM171A1 PE=1 SV=1
186	1	SwissProt	RS25_HUMAN	49	13791	2	2	2	2	0.82	40S ribosomal protein S25 OS=Homo sapiens GN=RPS25 PE=1 SV=1
195	1	SwissProt	RS3_HUMAN	46	26842	2	2	2	2	0.37	40S ribosomal protein S3 OS=Homo sapiens GN=RPS3 PE=1 SV=2
200	1	SwissProt	TPBG_HUMAN	44	46573	2	2	2	2	0.2	Trophoblast glycoprotein OS=Homo sapiens GN=TPBG PE=1 SV=1
204	1	SwissProt	DNJA1_HUMAN	43	45581	2	2	2	2	0.2	DnaJ homolog subfamily A member 1 OS=Homo sapiens GN=DNAJA1 PE=1 SV=2
211	1	SwissProt	LRC8D_HUMAN	41	99279	3	3	3	3	0.14	Volume-regulated anion channel subunit LRRC8D OS=Homo sapiens GN=LRRC8D PE=1 SV=1
215	1	SwissProt	LRC8B_HUMAN	40	93528	2	2	2	2	0.09	Volume-regulated anion channel subunit LRRC8B OS=Homo sapiens GN=LRRC8B PE=1 SV=2
224	1	SwissProt	RS20_HUMAN	36	13478	2	2	2	2	0.85	40S ribosomal protein S20 OS=Homo sapiens GN=RPS20 PE=1 SV=1
226	1	SwissProt	ITA7_HUMAN	35	130121	2	2	2	2	0.07	Integrin alpha-7 OS=Homo sapiens GN=ITGA7 PE=1 SV=3
227	1	SwissProt	CLH1_HUMAN	35	193260	2	2	2	2	0.05	Clathrin heavy chain 1 OS=Homo sapiens GN=CLTC PE=1 SV=5
232	1	SwissProt	ITA4_HUMAN	33	116252	3	3	2	2	0.08	Integrin alpha-4 OS=Homo sapiens GN=ITGA4 PE=1 SV=3
238	1	SwissProt	ITA2_HUMAN	32	130468	3	3	2	2	0.07	Integrin alpha-2 OS=Homo sapiens GN=ITGA2 PE=1 SV=1
245	1	SwissProt	TCPG_HUMAN	31	61066	2	2	2	2	0.15	T-complex protein 1 subunit gamma OS=Homo sapiens GN=CCT3 PE=1 SV=4
264	1	SwissProt	ABCA2_HUMAN	26	272039	2	2	2	2	0.03	ATP-binding cassette sub-family A member 2 OS=Homo sapiens GN=ABCA2 PE=1 SV=3
275	1	SwissProt	PLXD1_HUMAN	25	215293	2	2	2	2	0.04	Plexin-D1 OS=Homo sapiens GN=PLXND1 PE=1 SV=3
316	1	SwissProt	RS14_HUMAN	17	16434	2	2	2	2	0.66	40S ribosomal protein S14 OS=Homo sapiens GN=RPS14 PE=1 SV=3

## Sheet: Replicate 2_PltB-S35A toxin
Family	Member	Database	Accession	Score	Mass	Num. of matches	Num. of significant matches	Num. of sequences	Num. of significant sequences	emPAI	Description
1	1	SwissProt	TBA1B_HUMAN	1366	50804	52	52	21	21	4.73	Tubulin alpha-1B chain OS=Homo sapiens GN=TUBA1B PE=1 SV=1
1	2	SwissProt	TBA8_HUMAN	803	50746	29	29	11	11	1.5	Tubulin alpha-8 chain OS=Homo sapiens GN=TUBA8 PE=1 SV=1
2	1	SwissProt	TBB4B_HUMAN	1359	50255	62	62	27	27	15.03	Tubulin beta-4B chain OS=Homo sapiens GN=TUBB4B PE=1 SV=1
2	2	SwissProt	TBB5_HUMAN	1328	50095	56	56	26	26	13.92	Tubulin beta chain OS=Homo sapiens GN=TUBB PE=1 SV=2
2	3	SwissProt	TBB2B_HUMAN	1177	50377	50	50	21	21	7.86	Tubulin beta-2B chain OS=Homo sapiens GN=TUBB2B PE=1 SV=1
2	4	SwissProt	TBB6_HUMAN	488	50281	18	18	7	7	1.13	Tubulin beta-6 chain OS=Homo sapiens GN=TUBB6 PE=1 SV=1
3	1	SwissProt	ECE1_HUMAN	1348	87906	51	51	21	21	1.89	Endothelin-converting enzyme 1 OS=Homo sapiens GN=ECE1 PE=1 SV=2
4	1	SwissProt	K2C1_HUMAN	1312	66170	37	37	18	18	2.38	Keratin, type II cytoskeletal 1 OS=Homo sapiens GN=KRT1 PE=1 SV=6
4	2	SwissProt	K22E_HUMAN	295	65678	10	10	7	7	0.57	Keratin, type II cytoskeletal 2 epidermal OS=Homo sapiens GN=KRT2 PE=1 SV=2
5	1	SwissProt	B3A2_HUMAN	1252	137493	45	45	23	23	1.04	Anion exchange protein 2 OS=Homo sapiens GN=SLC4A2 PE=1 SV=4
6	1	SwissProt	HSP7C_HUMAN	958	71082	33	33	18	18	1.93	Heat shock cognate 71 kDa protein OS=Homo sapiens GN=HSPA8 PE=1 SV=1
6	2	SwissProt	HS71A_HUMAN	383	70294	16	16	11	11	0.94	Heat shock 70 kDa protein 1A OS=Homo sapiens GN=HSPA1A PE=1 SV=1
6	3	SwissProt	HS71L_HUMAN	161	70730	8	8	6	6	0.43	Heat shock 70 kDa protein 1-like OS=Homo sapiens GN=HSPA1L PE=1 SV=2
7	1	SwissProt	LAMP1_HUMAN	896	45367	45	45	9	9	1.31	Lysosome-associated membrane glycoprotein 1 OS=Homo sapiens GN=LAMP1 PE=1 SV=3
8	1	SwissProt	LRP1_HUMAN	796	523150	35	35	25	25	0.23	Prolow-density lipoprotein receptor-related protein 1 OS=Homo sapiens GN=LRP1 PE=1 SV=2
9	1	SwissProt	K1C10_HUMAN	648	59020	14	14	10	10	1.2	Keratin, type I cytoskeletal 10 OS=Homo sapiens GN=KRT10 PE=1 SV=6
9	2	SwissProt	K1C14_HUMAN	62	51872	2	2	2	2	0.18	Keratin, type I cytoskeletal 14 OS=Homo sapiens GN=KRT14 PE=1 SV=4
10	1	SwissProt	LCAP_HUMAN	643	117787	23	23	12	12	0.6	Leucyl-cystinyl aminopeptidase OS=Homo sapiens GN=LNPEP PE=1 SV=3
11	1	SwissProt	ACTB_HUMAN	590	42052	25	25	15	15	3.98	Actin, cytoplasmic 1 OS=Homo sapiens GN=ACTB PE=1 SV=1
12	1	SwissProt	PODXL_HUMAN	558	59055	21	21	9	9	0.91	Podocalyxin OS=Homo sapiens GN=PODXL PE=1 SV=2
13	1	SwissProt	S39AE_HUMAN	557	54918	11	11	4	4	0.36	Zinc transporter ZIP14 OS=Homo sapiens GN=SLC39A14 PE=1 SV=3
14	1	SwissProt	AGRL2_HUMAN	529	165468	15	15	11	11	0.33	Adhesion G protein-coupled receptor L2 OS=Homo sapiens GN=ADGRL2 PE=1 SV=2
15	1	SwissProt	LAMP2_HUMAN	460	45503	30	30	6	6	0.75	Lysosome-associated membrane glycoprotein 2 OS=Homo sapiens GN=LAMP2 PE=1 SV=2
16	1	SwissProt	CH60_HUMAN	448	61187	11	11	8	8	0.74	60 kDa heat shock protein, mitochondrial OS=Homo sapiens GN=HSPD1 PE=1 SV=2
17	1	SwissProt	EF1A1_HUMAN	422	50451	15	15	7	7	0.8	Elongation factor 1-alpha 1 OS=Homo sapiens GN=EEF1A1 PE=1 SV=1
18	1	SwissProt	DAG1_HUMAN	422	97723	26	26	10	10	0.54	Dystroglycan OS=Homo sapiens GN=DAG1 PE=1 SV=2
19	1	SwissProt	HS90B_HUMAN	420	83554	18	18	10	10	0.75	Heat shock protein HSP 90-beta OS=Homo sapiens GN=HSP90AB1 PE=1 SV=4
19	2	SwissProt	HS90A_HUMAN	163	85006	8	8	7	7	0.42	Heat shock protein HSP 90-alpha OS=Homo sapiens GN=HSP90AA1 PE=1 SV=5
19	3	SwissProt	ENPL_HUMAN	81	92696	2	2	2	2	0.1	Endoplasmin OS=Homo sapiens GN=HSP90B1 PE=1 SV=1
20	1	SwissProt	PTPRA_HUMAN	404	91455	26	26	14	14	0.91	Receptor-type tyrosine-protein phosphatase alpha OS=Homo sapiens GN=PTPRA PE=1 SV=2
21	1	SwissProt	LRC8A_HUMAN	394	95051	16	16	10	10	0.56	Volume-regulated anion channel subunit LRRC8A OS=Homo sapiens GN=LRRC8A PE=1 SV=1
22	1	SwissProt	INSR_HUMAN	380	158912	18	18	12	12	0.38	Insulin receptor OS=Homo sapiens GN=INSR PE=1 SV=4
22	2	SwissProt	IGF1R_HUMAN	181	157202	13	13	10	10	0.31	Insulin-like growth factor 1 receptor OS=Homo sapiens GN=IGF1R PE=1 SV=1
23	1	SwissProt	SERA_HUMAN	367	57356	15	15	11	11	1.25	D-3-phosphoglycerate dehydrogenase OS=Homo sapiens GN=PHGDH PE=1 SV=4
24	1	SwissProt	AT1A1_HUMAN	365	114135	11	11	11	11	0.51	Sodium/potassium-transporting ATPase subunit alpha-1 OS=Homo sapiens GN=ATP1A1 PE=1 SV=1
25	1	SwissProt	CLCN7_HUMAN	351	89136	21	21	14	14	0.95	H(+)/Cl(-) exchange transporter 7 OS=Homo sapiens GN=CLCN7 PE=1 SV=2
26	1	SwissProt	EF2_HUMAN	318	96246	13	13	10	10	0.55	Elongation factor 2 OS=Homo sapiens GN=EEF2 PE=1 SV=4
27	1	SwissProt	ITA5_HUMAN	317	115605	11	11	7	7	0.29	Integrin alpha-5 OS=Homo sapiens GN=ITGA5 PE=1 SV=2
28	1	SwissProt	ENOA_HUMAN	316	47481	13	13	9	9	1.23	Alpha-enolase OS=Homo sapiens GN=ENO1 PE=1 SV=2
29	1	SwissProt	LDLR_HUMAN	300	98906	15	15	11	11	0.67	Low-density lipoprotein receptor OS=Homo sapiens GN=LDLR PE=1 SV=1
30	1	SwissProt	S4A7_HUMAN	288	137098	9	9	7	7	0.24	Sodium bicarbonate cotransporter 3 OS=Homo sapiens GN=SLC4A7 PE=1 SV=2
31	1	SwissProt	ERP44_HUMAN	279	47341	13	13	9	9	1.24	Endoplasmic reticulum resident protein 44 OS=Homo sapiens GN=ERP44 PE=1 SV=1
32	1	SwissProt	ATPB_HUMAN	274	56525	14	14	10	10	1.28	ATP synthase subunit beta, mitochondrial OS=Homo sapiens GN=ATP5B PE=1 SV=3
33	1	SwissProt	NPC1_HUMAN	272	144868	10	10	7	7	0.23	Niemann-Pick C1 protein OS=Homo sapiens GN=NPC1 PE=1 SV=2
34	1	SwissProt	AAAT_HUMAN	268	57018	12	12	5	5	0.45	Neutral amino acid transporter B(0) OS=Homo sapiens GN=SLC1A5 PE=1 SV=2
35	1	SwissProt	LTOR1_HUMAN	252	17848	9	9	6	6	3.05	Ragulator complex protein LAMTOR1 OS=Homo sapiens GN=LAMTOR1 PE=1 SV=2
36	1	SwissProt	MEP50_HUMAN	251	37442	14	14	5	5	0.76	Methylosome protein 50 OS=Homo sapiens GN=WDR77 PE=1 SV=1
37	1	SwissProt	NICA_HUMAN	243	79103	8	8	4	4	0.24	Nicastrin OS=Homo sapiens GN=NCSTN PE=1 SV=2
38	1	SwissProt	PPIA_HUMAN	241	18229	12	12	7	7	5.24	Peptidyl-prolyl cis-trans isomerase A OS=Homo sapiens GN=PPIA PE=1 SV=2
39	1	SwissProt	PTPRJ_HUMAN	241	147048	12	12	12	12	0.41	Receptor-type tyrosine-protein phosphatase eta OS=Homo sapiens GN=PTPRJ PE=1 SV=3
40	1	SwissProt	MUC18_HUMAN	239	72532	9	9	5	5	0.34	Cell surface glycoprotein MUC18 OS=Homo sapiens GN=MCAM PE=1 SV=2
41	1	SwissProt	CLCN3_HUMAN	239	91934	7	7	3	3	0.15	H(+)/Cl(-) exchange transporter 3 OS=Homo sapiens GN=CLCN3 PE=1 SV=2
42	1	SwissProt	ENPP1_HUMAN	238	107024	10	10	8	8	0.37	Ectonucleotide pyrophosphatase/phosphodiesterase family member 1 OS=Homo sapiens GN=ENPP1 PE=1 SV=2
43	1	SwissProt	K1549_HUMAN	237	211253	11	11	8	8	0.17	UPF0606 protein KIAA1549 OS=Homo sapiens GN=KIAA1549 PE=1 SV=4
44	1	SwissProt	KIF11_HUMAN	230	120111	8	8	7	7	0.28	Kinesin-like protein KIF11 OS=Homo sapiens GN=KIF11 PE=1 SV=2
45	1	SwissProt	RL38_HUMAN	227	8270	8	8	4	4	6.03	60S ribosomal protein L38 OS=Homo sapiens GN=RPL38 PE=1 SV=2
46	1	SwissProt	ALDOA_HUMAN	219	39851	8	8	6	6	0.89	Fructose-bisphosphate aldolase A OS=Homo sapiens GN=ALDOA PE=1 SV=2
47	1	SwissProt	PRDX1_HUMAN	219	22324	7	7	3	3	0.76	Peroxiredoxin-1 OS=Homo sapiens GN=PRDX1 PE=1 SV=1
47	2	SwissProt	PRDX2_HUMAN	219	22049	10	10	7	7	2.77	Peroxiredoxin-2 OS=Homo sapiens GN=PRDX2 PE=1 SV=5
47	3	SwissProt	PRDX4_HUMAN	104	30749	5	5	3	3	0.51	Peroxiredoxin-4 OS=Homo sapiens GN=PRDX4 PE=1 SV=1
48	1	SwissProt	S38A2_HUMAN	210	56332	4	4	2	2	0.16	Sodium-coupled neutral amino acid transporter 2 OS=Homo sapiens GN=SLC38A2 PE=1 SV=2
49	1	SwissProt	PVR_HUMAN	197	45787	9	9	5	5	0.74	Poliovirus receptor OS=Homo sapiens GN=PVR PE=1 SV=2
50	1	SwissProt	S12A4_HUMAN	188	121712	10	10	7	7	0.28	Solute carrier family 12 member 4 OS=Homo sapiens GN=SLC12A4 PE=1 SV=2
50	2	SwissProt	S12A7_HUMAN	158	120283	7	7	6	6	0.24	Solute carrier family 12 member 7 OS=Homo sapiens GN=SLC12A7 PE=1 SV=3
50	3	SwissProt	S12A6_HUMAN	151	128618	5	5	3	3	0.1	Solute carrier family 12 member 6 OS=Homo sapiens GN=SLC12A6 PE=1 SV=2
51	1	SwissProt	OSTM1_HUMAN	188	38031	8	8	4	4	0.56	Osteopetrosis-associated transmembrane protein 1 OS=Homo sapiens GN=OSTM1 PE=1 SV=1
52	1	SwissProt	G3P_HUMAN	188	36201	10	10	6	6	1.01	Glyceraldehyde-3-phosphate dehydrogenase OS=Homo sapiens GN=GAPDH PE=1 SV=3
53	1	SwissProt	MCLN1_HUMAN	179	66120	6	6	3	3	0.21	Mucolipin-1 OS=Homo sapiens GN=MCOLN1 PE=1 SV=1
54	1	SwissProt	LRC8E_HUMAN	175	91387	6	6	3	3	0.15	Volume-regulated anion channel subunit LRRC8E OS=Homo sapiens GN=LRRC8E PE=1 SV=2
55	1	SwissProt	ITB1_HUMAN	173	91664	9	9	8	8	0.45	Integrin beta-1 OS=Homo sapiens GN=ITGB1 PE=1 SV=2
56	1	SwissProt	HNRPU_HUMAN	172	91269	7	7	6	6	0.32	Heterogeneous nuclear ribonucleoprotein U OS=Homo sapiens GN=HNRNPU PE=1 SV=6
57	1	SwissProt	KVD26_HUMAN	171	13403	5	5	3	3	1.52	Immunoglobulin kappa variable 2D-26 OS=Homo sapiens GN=IGKV2D-26 PE=3 SV=1
57	2	SwissProt	KV230_HUMAN	29	13291	3	3	2	2	0.86	Immunoglobulin kappa variable 2-30 OS=Homo sapiens GN=IGKV2-30 PE=3 SV=2
58	1	SwissProt	PPAL_HUMAN	171	48713	5	5	4	4	0.41	Lysosomal acid phosphatase OS=Homo sapiens GN=ACP2 PE=1 SV=3
59	1	SwissProt	PHB_HUMAN	171	29843	4	4	4	4	0.76	Prohibitin OS=Homo sapiens GN=PHB PE=1 SV=1
60	1	SwissProt	FABP5_HUMAN	170	15497	4	4	4	4	1.91	Fatty acid-binding protein, epidermal OS=Homo sapiens GN=FABP5 PE=1 SV=3
61	1	SwissProt	TMEM9_HUMAN	170	21074	6	6	2	2	0.49	Transmembrane protein 9 OS=Homo sapiens GN=TMEM9 PE=1 SV=1
62	1	SwissProt	RS19_HUMAN	169	16051	5	5	4	4	1.81	40S ribosomal protein S19 OS=Homo sapiens GN=RPS19 PE=1 SV=2
63	1	SwissProt	ADT2_HUMAN	160	33059	9	9	7	7	1.15	ADP/ATP translocase 2 OS=Homo sapiens GN=SLC25A5 PE=1 SV=7
63	2	SwissProt	ADT1_HUMAN	62	33271	4	4	4	4	0.66	ADP/ATP translocase 1 OS=Homo sapiens GN=SLC25A4 PE=1 SV=4
65	1	SwissProt	S10A7_HUMAN	151	11578	8	8	3	3	1.91	Protein S100-A7 OS=Homo sapiens GN=S100A7 PE=1 SV=4
66	1	SwissProt	GRP78_HUMAN	150	72402	7	7	6	6	0.42	78 kDa glucose-regulated protein OS=Homo sapiens GN=HSPA5 PE=1 SV=2
68	1	SwissProt	RL5_HUMAN	141	34569	3	3	2	2	0.28	60S ribosomal protein L5 OS=Homo sapiens GN=RPL5 PE=1 SV=3
69	1	SwissProt	FPRP_HUMAN	136	99464	6	6	4	4	0.19	Prostaglandin F2 receptor negative regulator OS=Homo sapiens GN=PTGFRN PE=1 SV=2
70	1	SwissProt	KPYM_HUMAN	133	58470	6	6	5	5	0.44	Pyruvate kinase PKM OS=Homo sapiens GN=PKM PE=1 SV=4
71	1	SwissProt	RAN_HUMAN	129	24579	4	4	4	4	0.98	GTP-binding nuclear protein Ran OS=Homo sapiens GN=RAN PE=1 SV=3
72	1	SwissProt	IF4A1_HUMAN	128	46353	5	5	3	3	0.31	Eukaryotic initiation factor 4A-I OS=Homo sapiens GN=EIF4A1 PE=1 SV=1
73	1	SwissProt	CD320_HUMAN	127	29998	4	4	2	2	0.32	CD320 antigen OS=Homo sapiens GN=CD320 PE=1 SV=1
74	1	SwissProt	NHRF2_HUMAN	125	37619	7	7	4	4	0.57	Na(+)/H(+) exchange regulatory cofactor NHE-RF2 OS=Homo sapiens GN=SLC9A3R2 PE=1 SV=2
76	1	SwissProt	PARP1_HUMAN	122	113811	3	3	3	3	0.12	Poly [ADP-ribose] polymerase 1 OS=Homo sapiens GN=PARP1 PE=1 SV=4
77	1	SwissProt	EF1G_HUMAN	120	50429	5	5	3	3	0.4	Elongation factor 1-gamma OS=Homo sapiens GN=EEF1G PE=1 SV=3
78	1	SwissProt	KCRB_HUMAN	120	42902	6	6	3	3	0.34	Creatine kinase B-type OS=Homo sapiens GN=CKB PE=1 SV=1
79	1	SwissProt	ENPP4_HUMAN	118	52007	3	3	2	2	0.18	Bis(5'-adenosyl)-triphosphatase ENPP4 OS=Homo sapiens GN=ENPP4 PE=1 SV=3
80	1	SwissProt	HNRPK_HUMAN	118	51230	3	3	2	2	0.18	Heterogeneous nuclear ribonucleoprotein K OS=Homo sapiens GN=HNRNPK PE=1 SV=1
81	1	SwissProt	PHB2_HUMAN	117	33276	3	3	3	3	0.46	Prohibitin-2 OS=Homo sapiens GN=PHB2 PE=1 SV=2
82	1	SwissProt	RS14_HUMAN	116	16434	6	6	3	3	1.14	40S ribosomal protein S14 OS=Homo sapiens GN=RPS14 PE=1 SV=3
83	1	SwissProt	RL19_HUMAN	115	23565	3	3	2	2	0.43	60S ribosomal protein L19 OS=Homo sapiens GN=RPL19 PE=1 SV=1
84	1	SwissProt	MPCP_HUMAN	115	40525	6	6	4	4	0.52	Phosphate carrier protein, mitochondrial OS=Homo sapiens GN=SLC25A3 PE=1 SV=2
85	1	SwissProt	GLMP_HUMAN	112	44178	3	3	2	2	0.21	Glycosylated lysosomal membrane protein OS=Homo sapiens GN=GLMP PE=1 SV=1
86	1	SwissProt	NUCL_HUMAN	112	76625	4	4	3	3	0.18	Nucleolin OS=Homo sapiens GN=NCL PE=1 SV=3
87	1	SwissProt	RO52_HUMAN	112	55162	7	7	6	6	0.58	E3 ubiquitin-protein ligase TRIM21 OS=Homo sapiens GN=TRIM21 PE=1 SV=1
88	1	SwissProt	MIF_HUMAN	110	12639	5	5	3	3	1.66	Macrophage migration inhibitory factor OS=Homo sapiens GN=MIF PE=1 SV=4
89	1	SwissProt	GRP75_HUMAN	107	73920	5	5	4	4	0.26	Stress-70 protein, mitochondrial OS=Homo sapiens GN=HSPA9 PE=1 SV=2
90	1	SwissProt	EF1D_HUMAN	107	31217	2	2	2	2	0.31	Elongation factor 1-delta OS=Homo sapiens GN=EEF1D PE=1 SV=5
91	1	SwissProt	4F2_HUMAN	106	68180	5	5	3	3	0.21	4F2 cell-surface antigen heavy chain OS=Homo sapiens GN=SLC3A2 PE=1 SV=3
92	1	SwissProt	TPBG_HUMAN	105	46573	4	4	4	4	0.44	Trophoblast glycoprotein OS=Homo sapiens GN=TPBG PE=1 SV=1
93	1	SwissProt	ATRN_HUMAN	104	163450	3	3	2	2	0.05	Attractin OS=Homo sapiens GN=ATRN PE=1 SV=2
94	1	SwissProt	RL6_HUMAN	104	32765	4	4	3	3	0.47	60S ribosomal protein L6 OS=Homo sapiens GN=RPL6 PE=1 SV=3
95	1	SwissProt	S12A2_HUMAN	103	132048	3	3	3	3	0.1	Solute carrier family 12 member 2 OS=Homo sapiens GN=SLC12A2 PE=1 SV=1
96	1	SwissProt	TCPD_HUMAN	101	58401	5	5	3	3	0.24	T-complex protein 1 subunit delta OS=Homo sapiens GN=CCT4 PE=1 SV=4
97	1	SwissProt	LDHB_HUMAN	101	36900	2	2	2	2	0.26	L-lactate dehydrogenase B chain OS=Homo sapiens GN=LDHB PE=1 SV=2
98	1	SwissProt	VPP1_HUMAN	100	97148	3	3	3	3	0.14	V-type proton ATPase 116 kDa subunit a isoform 1 OS=Homo sapiens GN=ATP6V0A1 PE=1 SV=3
99	1	SwissProt	PGK1_HUMAN	100	44985	4	4	4	4	0.46	Phosphoglycerate kinase 1 OS=Homo sapiens GN=PGK1 PE=1 SV=3
100	1	SwissProt	SPIN1_HUMAN	100	29696	6	6	3	3	0.53	Spindlin-1 OS=Homo sapiens GN=SPIN1 PE=1 SV=3
101	1	SwissProt	RL23_HUMAN	99	14970	4	4	3	3	1.29	60S ribosomal protein L23 OS=Homo sapiens GN=RPL23 PE=1 SV=1
102	1	SwissProt	TERA_HUMAN	98	89950	4	4	4	4	0.21	Transitional endoplasmic reticulum ATPase OS=Homo sapiens GN=VCP PE=1 SV=4
103	1	SwissProt	CBR1_HUMAN	97	30641	2	2	2	2	0.32	Carbonyl reductase [NADPH] 1 OS=Homo sapiens GN=CBR1 PE=1 SV=3
104	1	SwissProt	PRKDC_HUMAN	96	473749	6	6	6	6	0.06	DNA-dependent protein kinase catalytic subunit OS=Homo sapiens GN=PRKDC PE=1 SV=3
105	1	SwissProt	DDX3X_HUMAN	95	73597	3	3	3	3	0.19	ATP-dependent RNA helicase DDX3X OS=Homo sapiens GN=DDX3X PE=1 SV=3
106	1	SwissProt	F10A1_HUMAN	94	41477	2	2	2	2	0.23	Hsc70-interacting protein OS=Homo sapiens GN=ST13 PE=1 SV=2
107	1	SwissProt	AATM_HUMAN	94	47886	2	2	2	2	0.19	Aspartate aminotransferase, mitochondrial OS=Homo sapiens GN=GOT2 PE=1 SV=3
108	1	SwissProt	PSA5_HUMAN	91	26565	2	2	2	2	0.37	Proteasome subunit alpha type-5 OS=Homo sapiens GN=PSMA5 PE=1 SV=3
109	1	SwissProt	CLH1_HUMAN	90	193260	2	2	2	2	0.05	Clathrin heavy chain 1 OS=Homo sapiens GN=CLTC PE=1 SV=5
110	1	SwissProt	RSSA_HUMAN	89	32947	3	3	3	3	0.47	40S ribosomal protein SA OS=Homo sapiens GN=RPSA PE=1 SV=4
111	1	SwissProt	PCBP2_HUMAN	88	38955	4	4	3	3	0.38	Poly(rC)-binding protein 2 OS=Homo sapiens GN=PCBP2 PE=1 SV=1
111	2	SwissProt	PCBP1_HUMAN	80	37987	4	4	4	4	0.56	Poly(rC)-binding protein 1 OS=Homo sapiens GN=PCBP1 PE=1 SV=2
112	1	SwissProt	TCPG_HUMAN	88	61066	3	3	3	3	0.23	T-complex protein 1 subunit gamma OS=Homo sapiens GN=CCT3 PE=1 SV=4
113	1	SwissProt	COF1_HUMAN	88	18719	5	5	4	4	1.43	Cofilin-1 OS=Homo sapiens GN=CFL1 PE=1 SV=3
114	1	SwissProt	HEG1_HUMAN	88	149023	4	4	2	2	0.09	Protein HEG homolog 1 OS=Homo sapiens GN=HEG1 PE=1 SV=3
115	1	SwissProt	PUR2_HUMAN	88	108953	2	2	2	2	0.08	Trifunctional purine biosynthetic protein adenosine-3 OS=Homo sapiens GN=GART PE=1 SV=1
116	1	SwissProt	SLIK5_HUMAN	87	108672	6	6	5	5	0.22	SLIT and NTRK-like protein 5 OS=Homo sapiens GN=SLITRK5 PE=2 SV=2
117	1	SwissProt	EFTU_HUMAN	87	49852	5	5	3	3	0.29	Elongation factor Tu, mitochondrial OS=Homo sapiens GN=TUFM PE=1 SV=2
118	1	SwissProt	TCPZ_HUMAN	87	58444	5	5	4	4	0.34	T-complex protein 1 subunit zeta OS=Homo sapiens GN=CCT6A PE=1 SV=3
119	1	SwissProt	RL13_HUMAN	86	24304	3	3	3	3	0.68	60S ribosomal protein L13 OS=Homo sapiens GN=RPL13 PE=1 SV=4
121	1	SwissProt	K319L_HUMAN	85	116669	5	5	3	3	0.12	Dyslexia-associated protein KIAA0319-like protein OS=Homo sapiens GN=KIAA0319L PE=1 SV=2
122	1	SwissProt	TAGL2_HUMAN	84	22548	3	3	2	2	0.45	Transgelin-2 OS=Homo sapiens GN=TAGLN2 PE=1 SV=3
124	1	SwissProt	RS27A_HUMAN	82	18296	3	3	3	3	0.98	Ubiquitin-40S ribosomal protein S27a OS=Homo sapiens GN=RPS27A PE=1 SV=2
126	1	SwissProt	PORIM_HUMAN	80	21575	6	6	2	2	0.47	Porimin OS=Homo sapiens GN=TMEM123 PE=1 SV=1
127	1	SwissProt	MERTK_HUMAN	80	111148	5	5	5	5	0.21	Tyrosine-protein kinase Mer OS=Homo sapiens GN=MERTK PE=1 SV=2
128	1	SwissProt	HNRPM_HUMAN	79	77749	6	6	6	6	0.39	Heterogeneous nuclear ribonucleoprotein M OS=Homo sapiens GN=HNRNPM PE=1 SV=3
129	1	SwissProt	ATPA_HUMAN	79	59828	8	8	8	8	0.76	ATP synthase subunit alpha, mitochondrial OS=Homo sapiens GN=ATP5A1 PE=1 SV=1
130	1	SwissProt	ROA2_HUMAN	78	37464	2	2	2	2	0.25	Heterogeneous nuclear ribonucleoproteins A2/B1 OS=Homo sapiens GN=HNRNPA2B1 PE=1 SV=2
131	1	SwissProt	ECHA_HUMAN	77	83688	3	3	3	3	0.16	Trifunctional enzyme subunit alpha, mitochondrial OS=Homo sapiens GN=HADHA PE=1 SV=2
132	1	SwissProt	RL11_HUMAN	77	20468	3	3	2	2	0.51	60S ribosomal protein L11 OS=Homo sapiens GN=RPL11 PE=1 SV=2
133	1	SwissProt	SIDT2_HUMAN	76	95591	4	4	3	3	0.14	SID1 transmembrane family member 2 OS=Homo sapiens GN=SIDT2 PE=1 SV=2
134	1	SwissProt	RLA0_HUMAN	75	34423	2	2	2	2	0.28	60S acidic ribosomal protein P0 OS=Homo sapiens GN=RPLP0 PE=1 SV=1
135	1	SwissProt	MDHM_HUMAN	74	35937	3	3	2	2	0.26	Malate dehydrogenase, mitochondrial OS=Homo sapiens GN=MDH2 PE=1 SV=3
136	1	SwissProt	PRDX6_HUMAN	74	25133	2	2	2	2	0.4	Peroxiredoxin-6 OS=Homo sapiens GN=PRDX6 PE=1 SV=3
137	1	SwissProt	TPIS_HUMAN	74	31057	3	3	2	2	0.31	Triosephosphate isomerase OS=Homo sapiens GN=TPI1 PE=1 SV=3
138	1	SwissProt	SMD1_HUMAN	73	13273	3	3	3	3	1.54	Small nuclear ribonucleoprotein Sm D1 OS=Homo sapiens GN=SNRPD1 PE=1 SV=1
139	1	SwissProt	FUBP2_HUMAN	72	73355	2	2	2	2	0.12	Far upstream element-binding protein 2 OS=Homo sapiens GN=KHSRP PE=1 SV=4
140	1	SwissProt	S38A9_HUMAN	72	64418	3	3	2	2	0.14	Sodium-coupled neutral amino acid transporter 9 OS=Homo sapiens GN=SLC38A9 PE=1 SV=2
141	1	SwissProt	RS18_HUMAN	72	17708	3	3	3	3	1.02	40S ribosomal protein S18 OS=Homo sapiens GN=RPS18 PE=1 SV=3
144	1	SwissProt	RL30_HUMAN	70	12947	2	2	2	2	0.89	60S ribosomal protein L30 OS=Homo sapiens GN=RPL30 PE=1 SV=2
145	1	SwissProt	XPO2_HUMAN	70	111145	2	2	2	2	0.08	Exportin-2 OS=Homo sapiens GN=CSE1L PE=1 SV=3
146	1	SwissProt	FUBP1_HUMAN	70	67690	2	2	2	2	0.13	Far upstream element-binding protein 1 OS=Homo sapiens GN=FUBP1 PE=1 SV=3
147	1	SwissProt	PABP1_HUMAN	69	70854	2	2	2	2	0.13	Polyadenylate-binding protein 1 OS=Homo sapiens GN=PABPC1 PE=1 SV=2
148	1	SwissProt	PDIA3_HUMAN	69	57146	2	2	2	2	0.16	Protein disulfide-isomerase A3 OS=Homo sapiens GN=PDIA3 PE=1 SV=4
149	1	SwissProt	RL4_HUMAN	69	47953	3	3	3	3	0.3	60S ribosomal protein L4 OS=Homo sapiens GN=RPL4 PE=1 SV=5
150	1	SwissProt	RS4X_HUMAN	68	29807	3	3	3	3	0.53	40S ribosomal protein S4, X isoform OS=Homo sapiens GN=RPS4X PE=1 SV=2
151	1	SwissProt	RS28_HUMAN	68	7893	3	3	2	2	1.79	40S ribosomal protein S28 OS=Homo sapiens GN=RPS28 PE=1 SV=1
154	1	SwissProt	K1C9_HUMAN	67	62255	2	2	2	2	0.15	Keratin, type I cytoskeletal 9 OS=Homo sapiens GN=KRT9 PE=1 SV=3
161	1	SwissProt	1433E_HUMAN	65	29326	4	4	4	4	0.77	14-3-3 protein epsilon OS=Homo sapiens GN=YWHAE PE=1 SV=1
163	1	SwissProt	DHX9_HUMAN	64	142181	2	2	2	2	0.06	ATP-dependent RNA helicase A OS=Homo sapiens GN=DHX9 PE=1 SV=4
164	1	SwissProt	QCR2_HUMAN	64	48584	2	2	2	2	0.19	Cytochrome b-c1 complex subunit 2, mitochondrial OS=Homo sapiens GN=UQCRC2 PE=1 SV=3
166	1	SwissProt	RLA2_HUMAN	63	11658	2	2	2	2	1.03	60S acidic ribosomal protein P2 OS=Homo sapiens GN=RPLP2 PE=1 SV=1
168	1	SwissProt	RS3_HUMAN	63	26842	4	4	3	3	0.6	40S ribosomal protein S3 OS=Homo sapiens GN=RPS3 PE=1 SV=2
171	1	SwissProt	TXD12_HUMAN	62	19365	5	5	3	3	0.91	Thioredoxin domain-containing protein 12 OS=Homo sapiens GN=TXNDC12 PE=1 SV=1
172	1	SwissProt	ABCA2_HUMAN	61	272039	3	3	2	2	0.03	ATP-binding cassette sub-family A member 2 OS=Homo sapiens GN=ABCA2 PE=1 SV=3
173	1	SwissProt	DX39A_HUMAN	61	49611	2	2	2	2	0.19	ATP-dependent RNA helicase DDX39A OS=Homo sapiens GN=DDX39A PE=1 SV=2
174	1	SwissProt	TCPB_HUMAN	60	57794	2	2	2	2	0.16	T-complex protein 1 subunit beta OS=Homo sapiens GN=CCT2 PE=1 SV=4
176	1	SwissProt	CALX_HUMAN	58	67982	3	3	2	2	0.13	Calnexin OS=Homo sapiens GN=CANX PE=1 SV=2
179	1	SwissProt	S39AA_HUMAN	58	94928	3	3	3	3	0.14	Zinc transporter ZIP10 OS=Homo sapiens GN=SLC39A10 PE=1 SV=2
180	1	SwissProt	RS10_HUMAN	57	18886	4	4	3	3	0.94	40S ribosomal protein S10 OS=Homo sapiens GN=RPS10 PE=1 SV=1
181	1	SwissProt	IPYR_HUMAN	57	33095	2	2	2	2	0.29	Inorganic pyrophosphatase OS=Homo sapiens GN=PPA1 PE=1 SV=2
182	1	SwissProt	IF5A1_HUMAN	57	17049	2	2	2	2	0.63	Eukaryotic translation initiation factor 5A-1 OS=Homo sapiens GN=EIF5A PE=1 SV=2
183	1	SwissProt	RS20_HUMAN	56	13478	3	3	2	2	0.85	40S ribosomal protein S20 OS=Homo sapiens GN=RPS20 PE=1 SV=1
185	1	SwissProt	PPM1B_HUMAN	56	53180	2	2	2	2	0.17	Protein phosphatase 1B OS=Homo sapiens GN=PPM1B PE=1 SV=1
186	1	SwissProt	MANS1_HUMAN	55	47294	2	2	2	2	0.2	MANSC domain-containing protein 1 OS=Homo sapiens GN=MANSC1 PE=2 SV=1
187	1	SwissProt	NDKA_HUMAN	55	17309	3	3	2	2	0.62	Nucleoside diphosphate kinase A OS=Homo sapiens GN=NME1 PE=1 SV=1
188	1	SwissProt	AT2A2_HUMAN	54	116336	3	3	3	3	0.12	Sarcoplasmic/endoplasmic reticulum calcium ATPase 2 OS=Homo sapiens GN=ATP2A2 PE=1 SV=1
189	1	SwissProt	PGAM1_HUMAN	54	28900	2	2	2	2	0.34	Phosphoglycerate mutase 1 OS=Homo sapiens GN=PGAM1 PE=1 SV=2
191	1	SwissProt	TCPQ_HUMAN	53	60153	2	2	2	2	0.15	T-complex protein 1 subunit theta OS=Homo sapiens GN=CCT8 PE=1 SV=4
192	1	SwissProt	AGRL3_HUMAN	53	163591	4	4	4	4	0.11	Adhesion G protein-coupled receptor L3 OS=Homo sapiens GN=ADGRL3 PE=1 SV=2
193	1	SwissProt	NPTN_HUMAN	53	44702	5	5	3	3	0.33	Neuroplastin OS=Homo sapiens GN=NPTN PE=1 SV=2
195	1	SwissProt	AT133_HUMAN	51	139778	2	2	2	2	0.06	Probable cation-transporting ATPase 13A3 OS=Homo sapiens GN=ATP13A3 PE=1 SV=4
198	1	SwissProt	F1712_HUMAN	50	87723	4	4	3	3	0.16	Protein FAM171A2 OS=Homo sapiens GN=FAM171A2 PE=1 SV=1
198	2	SwissProt	F1711_HUMAN	35	98477	3	3	3	3	0.14	Protein FAM171A1 OS=Homo sapiens GN=FAM171A1 PE=1 SV=1
199	1	SwissProt	EIF3D_HUMAN	50	64560	2	2	2	2	0.14	Eukaryotic translation initiation factor 3 subunit D OS=Homo sapiens GN=EIF3D PE=1 SV=1
201	1	SwissProt	ANM5_HUMAN	50	73322	4	4	3	3	0.26	Protein arginine N-methyltransferase 5 OS=Homo sapiens GN=PRMT5 PE=1 SV=4
203	1	SwissProt	RS12_HUMAN	49	14905	2	2	2	2	0.75	40S ribosomal protein S12 OS=Homo sapiens GN=RPS12 PE=1 SV=3
204	1	SwissProt	RANG_HUMAN	48	23467	4	4	2	2	0.43	Ran-specific GTPase-activating protein OS=Homo sapiens GN=RANBP1 PE=1 SV=1
206	1	SwissProt	IF2B1_HUMAN	48	63783	2	2	2	2	0.14	Insulin-like growth factor 2 mRNA-binding protein 1 OS=Homo sapiens GN=IGF2BP1 PE=1 SV=2
208	1	SwissProt	PARK7_HUMAN	48	20050	3	3	2	2	0.52	Protein DJ-1 OS=Homo sapiens GN=PARK7 PE=1 SV=2
211	1	SwissProt	QCR1_HUMAN	47	53297	2	2	2	2	0.17	Cytochrome b-c1 complex subunit 1, mitochondrial OS=Homo sapiens GN=UQCRC1 PE=1 SV=3
215	1	SwissProt	SC5A6_HUMAN	46	69509	5	5	3	3	0.2	Sodium-dependent multivitamin transporter OS=Homo sapiens GN=SLC5A6 PE=2 SV=2
216	1	SwissProt	SDCB1_HUMAN	46	32595	2	2	2	2	0.29	Syntenin-1 OS=Homo sapiens GN=SDCBP PE=1 SV=1
217	1	SwissProt	RS15A_HUMAN	46	14944	3	3	2	2	0.74	40S ribosomal protein S15a OS=Homo sapiens GN=RPS15A PE=1 SV=2
220	1	SwissProt	EIF3C_HUMAN	45	105962	2	2	2	2	0.08	Eukaryotic translation initiation factor 3 subunit C OS=Homo sapiens GN=EIF3C PE=1 SV=1
225	1	SwissProt	GANAB_HUMAN	44	107263	2	2	2	2	0.08	Neutral alpha-glucosidase AB OS=Homo sapiens GN=GANAB PE=1 SV=3
226	1	SwissProt	EMB_HUMAN	43	37314	3	3	2	2	0.25	Embigin OS=Homo sapiens GN=EMB PE=1 SV=1
230	1	SwissProt	TKT_HUMAN	42	68519	4	4	3	3	0.2	Transketolase OS=Homo sapiens GN=TKT PE=1 SV=3
237	1	SwissProt	KAD2_HUMAN	41	26689	2	2	2	2	0.37	Adenylate kinase 2, mitochondrial OS=Homo sapiens GN=AK2 PE=1 SV=2
239	1	SwissProt	SE6L2_HUMAN	40	99038	3	3	3	3	0.14	Seizure 6-like protein 2 OS=Homo sapiens GN=SEZ6L2 PE=1 SV=2
249	1	SwissProt	LRC8C_HUMAN	38	93359	2	2	2	2	0.1	Volume-regulated anion channel subunit LRRC8C OS=Homo sapiens GN=LRRC8C PE=1 SV=2
254	1	SwissProt	BASI_HUMAN	37	42573	2	2	2	2	0.22	Basigin OS=Homo sapiens GN=BSG PE=1 SV=2
259	1	SwissProt	CBPD_HUMAN	36	153919	3	3	3	3	0.09	Carboxypeptidase D OS=Homo sapiens GN=CPD PE=1 SV=2
264	1	SwissProt	NONO_HUMAN	35	54311	3	3	3	3	0.26	Non-POU domain-containing octamer-binding protein OS=Homo sapiens GN=NONO PE=1 SV=4
265	1	SwissProt	RL27A_HUMAN	35	16665	3	3	2	2	0.65	60S ribosomal protein L27a OS=Homo sapiens GN=RPL27A PE=1 SV=2
271	1	SwissProt	RRAGC_HUMAN	34	44595	3	3	2	2	0.21	Ras-related GTP-binding protein C OS=Homo sapiens GN=RRAGC PE=1 SV=1
280	1	SwissProt	SYDC_HUMAN	33	57499	2	2	2	2	0.16	Aspartate--tRNA ligase, cytoplasmic OS=Homo sapiens GN=DARS PE=1 SV=2
289	1	SwissProt	SFPQ_HUMAN	32	76216	2	2	2	2	0.12	Splicing factor, proline- and glutamine-rich OS=Homo sapiens GN=SFPQ PE=1 SV=2
294	1	SwissProt	H4_HUMAN	31	11360	2	2	2	2	1.07	Histone H4 OS=Homo sapiens GN=HIST1H4A PE=1 SV=2
296	1	SwissProt	NPM_HUMAN	31	32726	2	2	2	2	0.29	Nucleophosmin OS=Homo sapiens GN=NPM1 PE=1 SV=2
299	1	SwissProt	AT1B3_HUMAN	30	31834	2	2	2	2	0.3	Sodium/potassium-transporting ATPase subunit beta-3 OS=Homo sapiens GN=ATP1B3 PE=1 SV=1
300	1	SwissProt	PTPRG_HUMAN	30	163042	3	3	2	2	0.05	Receptor-type tyrosine-protein phosphatase gamma OS=Homo sapiens GN=PTPRG PE=1 SV=4
307	1	SwissProt	RS17_HUMAN	29	15597	2	2	2	2	0.7	40S ribosomal protein S17 OS=Homo sapiens GN=RPS17 PE=1 SV=2
310	1	SwissProt	1433Z_HUMAN	29	27899	2	2	2	2	0.35	14-3-3 protein zeta/delta OS=Homo sapiens GN=YWHAZ PE=1 SV=1
313	1	SwissProt	LRP8_HUMAN	28	109157	2	2	2	2	0.08	Low-density lipoprotein receptor-related protein 8 OS=Homo sapiens GN=LRP8 PE=1 SV=4
329	1	SwissProt	TIF1B_HUMAN	26	90261	2	2	2	2	0.1	Transcription intermediary factor 1-beta OS=Homo sapiens GN=TRIM28 PE=1 SV=5
333	1	SwissProt	RS3A_HUMAN	25	30154	2	2	2	2	0.32	40S ribosomal protein S3a OS=Homo sapiens GN=RPS3A PE=1 SV=2
335	1	SwissProt	TPM1_HUMAN	25	32746	2	2	2	2	0.29	Tropomyosin alpha-1 chain OS=Homo sapiens GN=TPM1 PE=1 SV=2
353	1	SwissProt	ABHEB_HUMAN	23	22446	2	2	2	2	0.45	Protein ABHD14B OS=Homo sapiens GN=ABHD14B PE=1 SV=1
357	1	SwissProt	SYTC_HUMAN	23	84294	2	2	2	2	0.11	Threonine--tRNA ligase, cytoplasmic OS=Homo sapiens GN=TARS PE=1 SV=3
375	1	SwissProt	RS6_HUMAN	21	28834	2	2	2	2	0.34	40S ribosomal protein S6 OS=Homo sapiens GN=RPS6 PE=1 SV=1
381	1	SwissProt	RL24_HUMAN	20	17882	2	2	2	2	0.59	60S ribosomal protein L24 OS=Homo sapiens GN=RPL24 PE=1 SV=1
390	1	SwissProt	TCP4_HUMAN	19	14386	2	2	2	2	0.78	Activated RNA polymerase II transcriptional coactivator p15 OS=Homo sapiens GN=SUB1 PE=1 SV=3

## Sheet: Replicate 3_WT Toxin
Family	Member	Database	Accession	Score	Mass	Num. of matches	Num. of significant matches	Num. of sequences	Num. of significant sequences	emPAI	Description
1	1	SwissProt	ITB1_HUMAN	3607	91664	101	101	25	25	2.18	Integrin beta-1 OS=Homo sapiens GN=ITGB1 PE=1 SV=2
2	1	SwissProt	4F2_HUMAN	3065	68180	119	119	28	28	4.7	4F2 cell-surface antigen heavy chain OS=Homo sapiens GN=SLC3A2 PE=1 SV=3
3	1	SwissProt	CD44_HUMAN	2770	82001	83	83	15	15	1.29	CD44 antigen OS=Homo sapiens GN=CD44 PE=1 SV=3
4	1	SwissProt	B3A2_HUMAN	1914	137493	59	59	29	29	1.45	Anion exchange protein 2 OS=Homo sapiens GN=SLC4A2 PE=1 SV=4
5	1	SwissProt	AT1A1_HUMAN	1891	114135	50	50	25	25	1.54	Sodium/potassium-transporting ATPase subunit alpha-1 OS=Homo sapiens GN=ATP1A1 PE=1 SV=1
6	1	SwissProt	K2C1_HUMAN	1621	66170	43	43	21	21	3.09	Keratin, type II cytoskeletal 1 OS=Homo sapiens GN=KRT1 PE=1 SV=6
6	2	SwissProt	K2C6B_HUMAN	232	60315	5	5	3	3	0.23	Keratin, type II cytoskeletal 6B OS=Homo sapiens GN=KRT6B PE=1 SV=5
6	3	SwissProt	K22E_HUMAN	155	65678	7	7	4	4	0.29	Keratin, type II cytoskeletal 2 epidermal OS=Homo sapiens GN=KRT2 PE=1 SV=2
7	1	SwissProt	PODXL_HUMAN	1602	59055	51	51	13	13	1.54	Podocalyxin OS=Homo sapiens GN=PODXL PE=1 SV=2
8	1	SwissProt	LRP1_HUMAN	1538	523150	58	58	40	40	0.38	Prolow-density lipoprotein receptor-related protein 1 OS=Homo sapiens GN=LRP1 PE=1 SV=2
9	1	SwissProt	S12A4_HUMAN	1233	121712	51	51	25	25	1.57	Solute carrier family 12 member 4 OS=Homo sapiens GN=SLC12A4 PE=1 SV=2
9	2	SwissProt	S12A7_HUMAN	623	120283	18	18	12	12	0.53	Solute carrier family 12 member 7 OS=Homo sapiens GN=SLC12A7 PE=1 SV=3
9	3	SwissProt	S12A6_HUMAN	332	128618	13	13	7	7	0.26	Solute carrier family 12 member 6 OS=Homo sapiens GN=SLC12A6 PE=1 SV=2
10	1	SwissProt	TBA4A_HUMAN	923	50634	34	34	12	12	1.72	Tubulin alpha-4A chain OS=Homo sapiens GN=TUBA4A PE=1 SV=1
10	2	SwissProt	TBA1A_HUMAN	693	50788	32	32	16	16	2.78	Tubulin alpha-1A chain OS=Homo sapiens GN=TUBA1A PE=1 SV=1
11	1	SwissProt	EGFR_HUMAN	1102	137612	41	41	24	24	1.1	Epidermal growth factor receptor OS=Homo sapiens GN=EGFR PE=1 SV=2
12	1	SwissProt	ECE1_HUMAN	1075	87906	40	40	20	20	1.63	Endothelin-converting enzyme 1 OS=Homo sapiens GN=ECE1 PE=1 SV=2
13	1	SwissProt	DAF_HUMAN	1013	42400	35	35	14	14	3.03	Complement decay-accelerating factor OS=Homo sapiens GN=CD55 PE=1 SV=4
14	1	SwissProt	TBB5_HUMAN	970	50095	36	36	19	19	4.41	Tubulin beta chain OS=Homo sapiens GN=TUBB PE=1 SV=2
14	2	SwissProt	TBB4B_HUMAN	729	50255	29	29	16	16	3.18	Tubulin beta-4B chain OS=Homo sapiens GN=TUBB4B PE=1 SV=1
14	3	SwissProt	TBB4A_HUMAN	550	50010	23	23	11	11	1.75	Tubulin beta-4A chain OS=Homo sapiens GN=TUBB4A PE=1 SV=2
15	1	SwissProt	ITA5_HUMAN	948	115605	32	32	19	19	1.01	Integrin alpha-5 OS=Homo sapiens GN=ITGA5 PE=1 SV=2
16	1	SwissProt	MDR1_HUMAN	941	141788	36	36	23	23	0.99	Multidrug resistance protein 1 OS=Homo sapiens GN=ABCB1 PE=1 SV=3
17	1	SwissProt	ITA3_HUMAN	935	117735	33	33	16	16	0.78	Integrin alpha-3 OS=Homo sapiens GN=ITGA3 PE=1 SV=5
18	1	SwissProt	LAMP1_HUMAN	919	45367	31	31	9	9	1.31	Lysosome-associated membrane glycoprotein 1 OS=Homo sapiens GN=LAMP1 PE=1 SV=3
19	1	SwissProt	S12A2_HUMAN	907	132048	41	41	22	22	1.03	Solute carrier family 12 member 2 OS=Homo sapiens GN=SLC12A2 PE=1 SV=1
20	1	SwissProt	BASI_HUMAN	904	42573	31	31	9	9	1.97	Basigin OS=Homo sapiens GN=BSG PE=1 SV=2
21	1	SwissProt	MPRI_HUMAN	877	281155	36	36	27	27	0.5	Cation-independent mannose-6-phosphate receptor OS=Homo sapiens GN=IGF2R PE=1 SV=3
22	1	SwissProt	NHRF2_HUMAN	823	37619	34	34	16	16	5.01	Na(+)/H(+) exchange regulatory cofactor NHE-RF2 OS=Homo sapiens GN=SLC9A3R2 PE=1 SV=2
23	1	SwissProt	LDLR_HUMAN	752	98906	27	27	14	14	0.82	Low-density lipoprotein receptor OS=Homo sapiens GN=LDLR PE=1 SV=1
24	1	SwissProt	S4A7_HUMAN	701	137098	21	21	12	12	0.45	Sodium bicarbonate cotransporter 3 OS=Homo sapiens GN=SLC4A7 PE=1 SV=2
25	1	SwissProt	AAAT_HUMAN	696	57018	26	26	7	7	0.81	Neutral amino acid transporter B(0) OS=Homo sapiens GN=SLC1A5 PE=1 SV=2
26	1	SwissProt	ITA1_HUMAN	689	132304	32	32	18	18	0.78	Integrin alpha-1 OS=Homo sapiens GN=ITGA1 PE=1 SV=2
27	1	SwissProt	CBPD_HUMAN	660	153919	28	28	17	17	0.6	Carboxypeptidase D OS=Homo sapiens GN=CPD PE=1 SV=2
28	1	SwissProt	HSP7C_HUMAN	656	71082	26	26	19	19	2.11	Heat shock cognate 71 kDa protein OS=Homo sapiens GN=HSPA8 PE=1 SV=1
28	2	SwissProt	HS71A_HUMAN	166	70294	7	7	7	7	0.53	Heat shock 70 kDa protein 1A OS=Homo sapiens GN=HSPA1A PE=1 SV=1
28	3	SwissProt	HS71L_HUMAN	46	70730	5	5	4	4	0.35	Heat shock 70 kDa protein 1-like OS=Homo sapiens GN=HSPA1L PE=1 SV=2
29	1	SwissProt	MA1B1_HUMAN	610	79815	19	19	12	12	0.89	Endoplasmic reticulum mannosyl-oligosaccharide 1,2-alpha-mannosidase OS=Homo sapiens GN=MAN1B1 PE=1 SV=2
30	1	SwissProt	K1C10_HUMAN	604	59020	18	18	14	14	1.93	Keratin, type I cytoskeletal 10 OS=Homo sapiens GN=KRT10 PE=1 SV=6
30	2	SwissProt	K1C14_HUMAN	91	51872	5	5	4	4	0.39	Keratin, type I cytoskeletal 14 OS=Homo sapiens GN=KRT14 PE=1 SV=4
31	1	SwissProt	S39AE_HUMAN	588	54918	11	11	4	4	0.36	Zinc transporter ZIP14 OS=Homo sapiens GN=SLC39A14 PE=1 SV=3
32	1	SwissProt	MRP1_HUMAN	572	172907	24	24	15	15	0.45	Multidrug resistance-associated protein 1 OS=Homo sapiens GN=ABCC1 PE=1 SV=3
33	1	SwissProt	CD97_HUMAN	517	94603	14	14	9	9	0.5	CD97 antigen OS=Homo sapiens GN=CD97 PE=1 SV=4
34	1	SwissProt	CLCN3_HUMAN	502	91934	12	12	7	7	0.45	H(+)/Cl(-) exchange transporter 3 OS=Homo sapiens GN=CLCN3 PE=1 SV=2
35	1	SwissProt	STEA4_HUMAN	495	52518	15	15	9	9	1.24	Metalloreductase STEAP4 OS=Homo sapiens GN=STEAP4 PE=1 SV=1
36	1	SwissProt	NPC1_HUMAN	477	144868	15	15	11	11	0.38	Niemann-Pick C1 protein OS=Homo sapiens GN=NPC1 PE=1 SV=2
37	1	SwissProt	S38A2_HUMAN	457	56332	10	10	4	4	0.35	Sodium-coupled neutral amino acid transporter 2 OS=Homo sapiens GN=SLC38A2 PE=1 SV=2
38	1	SwissProt	ADT2_HUMAN	456	33059	23	23	13	13	3.61	ADP/ATP translocase 2 OS=Homo sapiens GN=SLC25A5 PE=1 SV=7
38	2	SwissProt	ADT3_HUMAN	363	33073	16	16	9	9	2.14	ADP/ATP translocase 3 OS=Homo sapiens GN=SLC25A6 PE=1 SV=4
39	1	SwissProt	LAT1_HUMAN	453	55659	14	14	5	5	0.46	Large neutral amino acids transporter small subunit 1 OS=Homo sapiens GN=SLC7A5 PE=1 SV=2
39	2	SwissProt	YLAT2_HUMAN	147	57532	3	3	2	2	0.16	Y+L amino acid transporter 2 OS=Homo sapiens GN=SLC7A6 PE=1 SV=3
40	1	SwissProt	GTR1_HUMAN	445	54391	14	14	6	6	0.59	Solute carrier family 2, facilitated glucose transporter member 1 OS=Homo sapiens GN=SLC2A1 PE=1 SV=2
41	1	SwissProt	FPRP_HUMAN	441	99464	21	21	14	14	0.82	Prostaglandin F2 receptor negative regulator OS=Homo sapiens GN=PTGFRN PE=1 SV=2
42	1	SwissProt	ZNT1_HUMAN	441	56290	14	14	10	10	1.12	Zinc transporter 1 OS=Homo sapiens GN=SLC30A1 PE=1 SV=3
43	1	SwissProt	MEP50_HUMAN	432	37442	16	16	8	8	1.46	Methylosome protein 50 OS=Homo sapiens GN=WDR77 PE=1 SV=1
44	1	SwissProt	K1C9_HUMAN	426	62255	15	15	11	11	1.26	Keratin, type I cytoskeletal 9 OS=Homo sapiens GN=KRT9 PE=1 SV=3
45	1	SwissProt	ADCY6_HUMAN	425	132299	14	14	8	8	0.29	Adenylate cyclase type 6 OS=Homo sapiens GN=ADCY6 PE=1 SV=2
46	1	SwissProt	SE6L2_HUMAN	417	99038	11	11	7	7	0.35	Seizure 6-like protein 2 OS=Homo sapiens GN=SEZ6L2 PE=1 SV=2
47	1	SwissProt	LCAP_HUMAN	415	117787	17	17	13	13	0.6	Leucyl-cystinyl aminopeptidase OS=Homo sapiens GN=LNPEP PE=1 SV=3
48	1	SwissProt	ITAV_HUMAN	411	117048	20	20	13	13	0.6	Integrin alpha-V OS=Homo sapiens GN=ITGAV PE=1 SV=2
49	1	SwissProt	MRP4_HUMAN	406	150344	12	12	8	8	0.25	Multidrug resistance-associated protein 4 OS=Homo sapiens GN=ABCC4 PE=1 SV=3
50	1	SwissProt	PVR_HUMAN	406	45787	12	12	6	6	0.74	Poliovirus receptor OS=Homo sapiens GN=PVR PE=1 SV=2
51	1	SwissProt	SERA_HUMAN	392	57356	15	15	10	10	1.09	D-3-phosphoglycerate dehydrogenase OS=Homo sapiens GN=PHGDH PE=1 SV=4
52	1	SwissProt	ACTB_HUMAN	389	42052	15	15	10	10	1.73	Actin, cytoplasmic 1 OS=Homo sapiens GN=ACTB PE=1 SV=1
52	2	SwissProt	ACTBL_HUMAN	193	42318	5	5	3	3	0.35	Beta-actin-like protein 2 OS=Homo sapiens GN=ACTBL2 PE=1 SV=2
53	1	SwissProt	PRKDC_HUMAN	376	473749	21	21	21	21	0.21	DNA-dependent protein kinase catalytic subunit OS=Homo sapiens GN=PRKDC PE=1 SV=3
54	1	SwissProt	ERP44_HUMAN	369	47341	15	15	10	10	1.44	Endoplasmic reticulum resident protein 44 OS=Homo sapiens GN=ERP44 PE=1 SV=1
55	1	SwissProt	L1CAM_HUMAN	359	140885	14	14	11	11	0.39	Neural cell adhesion molecule L1 OS=Homo sapiens GN=L1CAM PE=1 SV=2
56	1	SwissProt	NICA_HUMAN	350	79103	15	15	8	8	0.54	Nicastrin OS=Homo sapiens GN=NCSTN PE=1 SV=2
57	1	SwissProt	STK38_HUMAN	350	54498	12	12	9	9	1.01	Serine/threonine-protein kinase 38 OS=Homo sapiens GN=STK38 PE=1 SV=1
58	1	SwissProt	LRC8A_HUMAN	346	95051	12	12	9	9	0.49	Volume-regulated anion channel subunit LRRC8A OS=Homo sapiens GN=LRRC8A PE=1 SV=1
59	1	SwissProt	LAMP2_HUMAN	336	45503	17	17	6	6	0.75	Lysosome-associated membrane glycoprotein 2 OS=Homo sapiens GN=LAMP2 PE=1 SV=2
60	1	SwissProt	LTOR1_HUMAN	321	17848	9	9	7	7	4.11	Ragulator complex protein LAMTOR1 OS=Homo sapiens GN=LAMTOR1 PE=1 SV=2
61	1	SwissProt	MET_HUMAN	315	157779	19	19	14	14	0.46	Hepatocyte growth factor receptor OS=Homo sapiens GN=MET PE=1 SV=4
62	1	SwissProt	SL9A6_HUMAN	307	74627	9	9	3	3	0.19	Sodium/hydrogen exchanger 6 OS=Homo sapiens GN=SLC9A6 PE=1 SV=2
63	1	SwissProt	IGKC_HUMAN	301	11929	8	8	3	3	1.83	Immunoglobulin kappa constant OS=Homo sapiens GN=IGKC PE=1 SV=2
64	1	SwissProt	BST2_HUMAN	299	20041	9	9	4	4	1.3	Bone marrow stromal antigen 2 OS=Homo sapiens GN=BST2 PE=1 SV=1
65	1	SwissProt	ADCY9_HUMAN	297	152828	17	17	10	10	0.32	Adenylate cyclase type 9 OS=Homo sapiens GN=ADCY9 PE=1 SV=4
66	1	SwissProt	ANM5_HUMAN	288	73322	14	14	11	11	0.89	Protein arginine N-methyltransferase 5 OS=Homo sapiens GN=PRMT5 PE=1 SV=4
67	1	SwissProt	S38A5_HUMAN	287	52107	13	13	6	6	0.63	Sodium-coupled neutral amino acid transporter 5 OS=Homo sapiens GN=SLC38A5 PE=1 SV=1
68	1	SwissProt	SATT_HUMAN	287	56087	7	7	4	4	0.35	Neutral amino acid transporter A OS=Homo sapiens GN=SLC1A4 PE=1 SV=1
69	1	SwissProt	KCNK1_HUMAN	278	38632	9	9	5	5	0.73	Potassium channel subfamily K member 1 OS=Homo sapiens GN=KCNK1 PE=1 SV=1
70	1	SwissProt	VASN_HUMAN	274	72751	10	10	8	8	0.59	Vasorin OS=Homo sapiens GN=VASN PE=1 SV=1
71	1	SwissProt	AT1B1_HUMAN	272	35438	14	14	9	9	1.92	Sodium/potassium-transporting ATPase subunit beta-1 OS=Homo sapiens GN=ATP1B1 PE=1 SV=1
72	1	SwissProt	CLUS_HUMAN	261	53031	8	8	7	7	0.61	Clusterin OS=Homo sapiens GN=CLU PE=1 SV=1
73	1	SwissProt	ABCB6_HUMAN	249	94396	6	6	5	5	0.25	ATP-binding cassette sub-family B member 6, mitochondrial OS=Homo sapiens GN=ABCB6 PE=1 SV=1
74	1	SwissProt	PDXL2_HUMAN	247	65435	5	5	2	2	0.14	Podocalyxin-like protein 2 OS=Homo sapiens GN=PODXL2 PE=1 SV=1
75	1	SwissProt	VDAC2_HUMAN	243	32060	12	12	8	8	1.86	Voltage-dependent anion-selective channel protein 2 OS=Homo sapiens GN=VDAC2 PE=1 SV=2
76	1	SwissProt	FOLH1_HUMAN	240	84506	11	11	10	10	0.65	Glutamate carboxypeptidase 2 OS=Homo sapiens GN=FOLH1 PE=1 SV=1
77	1	SwissProt	GRP78_HUMAN	239	72402	8	8	7	7	0.51	78 kDa glucose-regulated protein OS=Homo sapiens GN=HSPA5 PE=1 SV=2
78	1	SwissProt	NPTN_HUMAN	238	44702	9	9	5	5	0.6	Neuroplastin OS=Homo sapiens GN=NPTN PE=1 SV=2
79	1	SwissProt	OSTM1_HUMAN	235	38031	8	8	3	3	0.39	Osteopetrosis-associated transmembrane protein 1 OS=Homo sapiens GN=OSTM1 PE=1 SV=1
80	1	SwissProt	PTPRA_HUMAN	232	91455	11	11	9	9	0.52	Receptor-type tyrosine-protein phosphatase alpha OS=Homo sapiens GN=PTPRA PE=1 SV=2
81	1	SwissProt	KVD26_HUMAN	231	13403	5	5	2	2	0.85	Immunoglobulin kappa variable 2D-26 OS=Homo sapiens GN=IGKV2D-26 PE=3 SV=1
81	2	SwissProt	KV230_HUMAN	94	13291	3	3	2	2	0.86	Immunoglobulin kappa variable 2-30 OS=Homo sapiens GN=IGKV2-30 PE=3 SV=2
81	3	SwissProt	KV228_HUMAN	70	13062	2	2	2	2	0.88	Immunoglobulin kappa variable 2-28 OS=Homo sapiens GN=IGKV2-28 PE=3 SV=1
82	1	SwissProt	F234A_HUMAN	225	60249	6	6	4	4	0.32	Protein FAM234A OS=Homo sapiens GN=FAM234A PE=1 SV=1
83	1	SwissProt	CLCN7_HUMAN	222	89136	13	13	8	8	0.46	H(+)/Cl(-) exchange transporter 7 OS=Homo sapiens GN=CLCN7 PE=1 SV=2
84	1	SwissProt	LEG3_HUMAN	208	26193	9	9	5	5	1.23	Galectin-3 OS=Homo sapiens GN=LGALS3 PE=1 SV=5
85	1	SwissProt	G3P_HUMAN	198	36201	5	5	4	4	0.59	Glyceraldehyde-3-phosphate dehydrogenase OS=Homo sapiens GN=GAPDH PE=1 SV=3
86	1	SwissProt	ITA2_HUMAN	191	130468	5	5	5	5	0.18	Integrin alpha-2 OS=Homo sapiens GN=ITGA2 PE=1 SV=1
87	1	SwissProt	1A69_HUMAN	189	41236	9	9	6	6	0.85	HLA class I histocompatibility antigen, A-69 alpha chain OS=Homo sapiens GN=HLA-A PE=1 SV=2
88	1	SwissProt	MUC1_HUMAN	189	122200	4	4	2	2	0.07	Mucin-1 OS=Homo sapiens GN=MUC1 PE=1 SV=3
89	1	SwissProt	RL38_HUMAN	182	8270	4	4	3	3	3.32	60S ribosomal protein L38 OS=Homo sapiens GN=RPL38 PE=1 SV=2
90	1	SwissProt	HS90B_HUMAN	182	83554	7	7	6	6	0.36	Heat shock protein HSP 90-beta OS=Homo sapiens GN=HSP90AB1 PE=1 SV=4
91	1	SwissProt	QSOX2_HUMAN	181	78221	6	6	3	3	0.18	Sulfhydryl oxidase 2 OS=Homo sapiens GN=QSOX2 PE=1 SV=3
92	1	SwissProt	LRC8E_HUMAN	178	91387	3	3	2	2	0.1	Volume-regulated anion channel subunit LRRC8E OS=Homo sapiens GN=LRRC8E PE=1 SV=2
93	1	SwissProt	SC6A9_HUMAN	176	79178	8	8	3	3	0.17	Sodium- and chloride-dependent glycine transporter 1 OS=Homo sapiens GN=SLC6A9 PE=1 SV=3
94	1	SwissProt	RS3_HUMAN	176	26842	6	6	5	5	1.18	40S ribosomal protein S3 OS=Homo sapiens GN=RPS3 PE=1 SV=2
95	1	SwissProt	EAA1_HUMAN	174	59705	4	4	2	2	0.15	Excitatory amino acid transporter 1 OS=Homo sapiens GN=SLC1A3 PE=1 SV=1
96	1	SwissProt	ATPB_HUMAN	173	56525	7	7	5	5	0.45	ATP synthase subunit beta, mitochondrial OS=Homo sapiens GN=ATP5B PE=1 SV=3
97	1	SwissProt	VPP1_HUMAN	171	97148	8	8	6	6	0.3	V-type proton ATPase 116 kDa subunit a isoform 1 OS=Homo sapiens GN=ATP6V0A1 PE=1 SV=3
98	1	SwissProt	LRP8_HUMAN	170	109157	6	6	5	5	0.21	Low-density lipoprotein receptor-related protein 8 OS=Homo sapiens GN=LRP8 PE=1 SV=4
99	1	SwissProt	AT133_HUMAN	170	139778	5	5	3	3	0.1	Probable cation-transporting ATPase 13A3 OS=Homo sapiens GN=ATP13A3 PE=1 SV=4
100	1	SwissProt	EZRI_HUMAN	163	69484	7	7	6	6	0.44	Ezrin OS=Homo sapiens GN=EZR PE=1 SV=4
101	1	SwissProt	S38A9_HUMAN	162	64418	5	5	3	3	0.22	Sodium-coupled neutral amino acid transporter 9 OS=Homo sapiens GN=SLC38A9 PE=1 SV=2
102	1	SwissProt	ENPP1_HUMAN	161	107024	5	5	4	4	0.17	Ectonucleotide pyrophosphatase/phosphodiesterase family member 1 OS=Homo sapiens GN=ENPP1 PE=1 SV=2
103	1	SwissProt	PHB_HUMAN	158	29843	7	7	5	5	1.02	Prohibitin OS=Homo sapiens GN=PHB PE=1 SV=1
104	1	SwissProt	CD320_HUMAN	154	29998	5	5	5	5	1.02	CD320 antigen OS=Homo sapiens GN=CD320 PE=1 SV=1
105	1	SwissProt	CD276_HUMAN	150	57941	4	4	4	4	0.34	CD276 antigen OS=Homo sapiens GN=CD276 PE=1 SV=1
107	1	SwissProt	PIEZ1_HUMAN	148	289855	5	5	3	3	0.05	Piezo-type mechanosensitive ion channel component 1 OS=Homo sapiens GN=PIEZO1 PE=1 SV=4
108	1	SwissProt	RRAGC_HUMAN	148	44595	7	7	6	6	0.76	Ras-related GTP-binding protein C OS=Homo sapiens GN=RRAGC PE=1 SV=1
109	1	SwissProt	SC5A3_HUMAN	146	80497	6	6	4	4	0.23	Sodium/myo-inositol cotransporter OS=Homo sapiens GN=SLC5A3 PE=1 SV=2
110	1	SwissProt	TMEM9_HUMAN	144	21074	5	5	3	3	0.81	Transmembrane protein 9 OS=Homo sapiens GN=TMEM9 PE=1 SV=1
110	2	SwissProt	TMM9B_HUMAN	56	23030	2	2	2	2	0.44	Transmembrane protein 9B OS=Homo sapiens GN=TMEM9B PE=1 SV=1
111	1	SwissProt	PPAL_HUMAN	143	48713	4	4	3	3	0.3	Lysosomal acid phosphatase OS=Homo sapiens GN=ACP2 PE=1 SV=3
112	1	SwissProt	PLXD1_HUMAN	141	215293	6	6	5	5	0.1	Plexin-D1 OS=Homo sapiens GN=PLXND1 PE=1 SV=3
113	1	SwissProt	FOLR1_HUMAN	140	30712	5	5	3	3	0.51	Folate receptor alpha OS=Homo sapiens GN=FOLR1 PE=1 SV=3
114	1	SwissProt	VIME_HUMAN	138	53676	8	8	7	7	0.74	Vimentin OS=Homo sapiens GN=VIM PE=1 SV=4
115	1	SwissProt	RS27A_HUMAN	137	18296	4	4	3	3	0.98	Ubiquitin-40S ribosomal protein S27a OS=Homo sapiens GN=RPS27A PE=1 SV=2
116	1	SwissProt	K319L_HUMAN	135	116669	5	5	4	4	0.16	Dyslexia-associated protein KIAA0319-like protein OS=Homo sapiens GN=KIAA0319L PE=1 SV=2
117	1	SwissProt	LMBD2_HUMAN	135	81861	6	6	4	4	0.23	LMBR1 domain-containing protein 2 OS=Homo sapiens GN=LMBRD2 PE=1 SV=1
118	1	SwissProt	VA0D1_HUMAN	132	40759	5	5	4	4	0.51	V-type proton ATPase subunit d 1 OS=Homo sapiens GN=ATP6V0D1 PE=1 SV=1
119	1	SwissProt	AMRP_HUMAN	129	41441	5	5	4	4	0.5	Alpha-2-macroglobulin receptor-associated protein OS=Homo sapiens GN=LRPAP1 PE=1 SV=1
120	1	SwissProt	KCT2_HUMAN	129	29331	3	3	2	2	0.33	Keratinocyte-associated transmembrane protein 2 OS=Homo sapiens GN=KCT2 PE=1 SV=2
121	1	SwissProt	ICAM1_HUMAN	128	58587	5	5	5	5	0.43	Intercellular adhesion molecule 1 OS=Homo sapiens GN=ICAM1 PE=1 SV=2
122	1	SwissProt	PPB1_HUMAN	128	58259	9	9	8	8	0.79	Alkaline phosphatase, placental type OS=Homo sapiens GN=ALPP PE=1 SV=2
123	1	SwissProt	MCP_HUMAN	127	44745	8	8	5	5	0.6	Membrane cofactor protein OS=Homo sapiens GN=CD46 PE=1 SV=3
124	1	SwissProt	NRAM2_HUMAN	127	62852	3	3	2	2	0.14	Natural resistance-associated macrophage protein 2 OS=Homo sapiens GN=SLC11A2 PE=1 SV=2
125	1	SwissProt	K1549_HUMAN	126	211253	5	5	4	4	0.08	UPF0606 protein KIAA1549 OS=Homo sapiens GN=KIAA1549 PE=1 SV=4
126	1	SwissProt	CTR1_HUMAN	126	68449	9	9	4	4	0.36	High affinity cationic amino acid transporter 1 OS=Homo sapiens GN=SLC7A1 PE=1 SV=1
127	1	SwissProt	ATPG_HUMAN	125	33032	4	4	4	4	0.66	ATP synthase subunit gamma, mitochondrial OS=Homo sapiens GN=ATP5C1 PE=1 SV=1
128	1	SwissProt	ATPA_HUMAN	125	59828	9	9	8	8	0.76	ATP synthase subunit alpha, mitochondrial OS=Homo sapiens GN=ATP5A1 PE=1 SV=1
129	1	SwissProt	S20A2_HUMAN	123	70861	2	2	2	2	0.13	Sodium-dependent phosphate transporter 2 OS=Homo sapiens GN=SLC20A2 PE=1 SV=1
130	1	SwissProt	PTPRJ_HUMAN	120	147048	4	4	3	3	0.09	Receptor-type tyrosine-protein phosphatase eta OS=Homo sapiens GN=PTPRJ PE=1 SV=3
131	1	SwissProt	IGG1_HUMAN	119	49926	5	5	4	4	0.4	Immunoglobulin gamma-1 heavy chain OS=Homo sapiens PE=1 SV=1
131	2	SwissProt	IGHG2_HUMAN	33	36505	2	2	2	2	0.26	Immunoglobulin heavy constant gamma 2 OS=Homo sapiens GN=IGHG2 PE=1 SV=2
132	1	SwissProt	RS16_HUMAN	117	16549	4	4	3	3	1.13	40S ribosomal protein S16 OS=Homo sapiens GN=RPS16 PE=1 SV=2
133	1	SwissProt	PLXB2_HUMAN	116	207734	3	3	3	3	0.06	Plexin-B2 OS=Homo sapiens GN=PLXNB2 PE=1 SV=3
135	1	SwissProt	ECHA_HUMAN	114	83688	6	6	5	5	0.29	Trifunctional enzyme subunit alpha, mitochondrial OS=Homo sapiens GN=HADHA PE=1 SV=2
136	1	SwissProt	GOLI4_HUMAN	110	81888	3	3	3	3	0.17	Golgi integral membrane protein 4 OS=Homo sapiens GN=GOLIM4 PE=1 SV=1
137	1	SwissProt	B4GT1_HUMAN	107	44291	4	4	3	3	0.33	Beta-1,4-galactosyltransferase 1 OS=Homo sapiens GN=B4GALT1 PE=1 SV=5
138	1	SwissProt	DAG1_HUMAN	107	97723	6	6	4	4	0.19	Dystroglycan OS=Homo sapiens GN=DAG1 PE=1 SV=2
139	1	SwissProt	MUC16_HUMAN	107	1520295	5	5	3	3	0.01	Mucin-16 OS=Homo sapiens GN=MUC16 PE=1 SV=3
140	1	SwissProt	GLMP_HUMAN	105	44178	3	3	2	2	0.21	Glycosylated lysosomal membrane protein OS=Homo sapiens GN=GLMP PE=1 SV=1
141	1	SwissProt	INSR_HUMAN	105	158912	5	5	4	4	0.11	Insulin receptor OS=Homo sapiens GN=INSR PE=1 SV=4
142	1	SwissProt	RAI3_HUMAN	104	40624	6	6	2	2	0.23	Retinoic acid-induced protein 3 OS=Homo sapiens GN=GPRC5A PE=1 SV=2
143	1	SwissProt	LG3BP_HUMAN	101	66202	3	3	2	2	0.14	Galectin-3-binding protein OS=Homo sapiens GN=LGALS3BP PE=1 SV=1
144	1	SwissProt	ALBU_HUMAN	101	71317	3	3	2	2	0.13	Serum albumin OS=Homo sapiens GN=ALB PE=1 SV=2
145	1	SwissProt	H2B1B_HUMAN	98	13942	2	2	2	2	0.81	Histone H2B type 1-B OS=Homo sapiens GN=HIST1H2BB PE=1 SV=2
146	1	SwissProt	TPBG_HUMAN	96	46573	3	3	2	2	0.2	Trophoblast glycoprotein OS=Homo sapiens GN=TPBG PE=1 SV=1
147	1	SwissProt	RL23_HUMAN	96	14970	4	4	2	2	0.74	60S ribosomal protein L23 OS=Homo sapiens GN=RPL23 PE=1 SV=1
148	1	SwissProt	PPIA_HUMAN	95	18229	4	4	3	3	0.99	Peptidyl-prolyl cis-trans isomerase A OS=Homo sapiens GN=PPIA PE=1 SV=2
149	1	SwissProt	EF1A1_HUMAN	94	50451	5	5	3	3	0.29	Elongation factor 1-alpha 1 OS=Homo sapiens GN=EEF1A1 PE=1 SV=1
150	1	SwissProt	NAGPA_HUMAN	94	57634	5	5	3	3	0.25	N-acetylglucosamine-1-phosphodiester alpha-N-acetylglucosaminidase OS=Homo sapiens GN=NAGPA PE=1 SV=2
151	1	SwissProt	XPO1_HUMAN	93	124447	4	4	4	4	0.15	Exportin-1 OS=Homo sapiens GN=XPO1 PE=1 SV=1
152	1	SwissProt	CLCN6_HUMAN	93	98651	3	3	3	3	0.14	Chloride transport protein 6 OS=Homo sapiens GN=CLCN6 PE=1 SV=2
156	1	SwissProt	PHB2_HUMAN	91	33276	3	3	3	3	0.46	Prohibitin-2 OS=Homo sapiens GN=PHB2 PE=1 SV=2
157	1	SwissProt	PPM1B_HUMAN	90	53180	4	4	4	4	0.37	Protein phosphatase 1B OS=Homo sapiens GN=PPM1B PE=1 SV=1
158	1	SwissProt	S38A1_HUMAN	90	54639	3	3	3	3	0.26	Sodium-coupled neutral amino acid transporter 1 OS=Homo sapiens GN=SLC38A1 PE=1 SV=1
159	1	SwissProt	ABCA2_HUMAN	89	272039	4	4	4	4	0.06	ATP-binding cassette sub-family A member 2 OS=Homo sapiens GN=ABCA2 PE=1 SV=3
160	1	SwissProt	LEG8_HUMAN	88	35957	2	2	2	2	0.26	Galectin-8 OS=Homo sapiens GN=LGALS8 PE=1 SV=4
161	1	SwissProt	LRFN4_HUMAN	88	67731	3	3	2	2	0.13	Leucine-rich repeat and fibronectin type-III domain-containing protein 4 OS=Homo sapiens GN=LRFN4 PE=1 SV=1
162	1	SwissProt	TECR_HUMAN	87	36410	4	4	4	4	0.59	Very-long-chain enoyl-CoA reductase OS=Homo sapiens GN=TECR PE=1 SV=1
163	1	SwissProt	NECT3_HUMAN	87	61477	4	4	2	2	0.15	Nectin-3 OS=Homo sapiens GN=NECTIN3 PE=1 SV=1
165	1	SwissProt	S17A5_HUMAN	84	55060	3	3	2	2	0.17	Sialin OS=Homo sapiens GN=SLC17A5 PE=1 SV=2
168	1	SwissProt	GRN_HUMAN	82	68518	2	2	2	2	0.13	Granulins OS=Homo sapiens GN=GRN PE=1 SV=2
170	1	SwissProt	CD63_HUMAN	81	26474	2	2	2	2	0.37	CD63 antigen OS=Homo sapiens GN=CD63 PE=1 SV=2
171	1	SwissProt	VPP3_HUMAN	80	93650	4	4	3	3	0.15	V-type proton ATPase 116 kDa subunit a isoform 3 OS=Homo sapiens GN=TCIRG1 PE=1 SV=3
172	1	SwissProt	RO52_HUMAN	79	55162	3	3	3	3	0.26	E3 ubiquitin-protein ligase TRIM21 OS=Homo sapiens GN=TRIM21 PE=1 SV=1
173	1	SwissProt	SC5A6_HUMAN	76	69509	4	4	3	3	0.2	Sodium-dependent multivitamin transporter OS=Homo sapiens GN=SLC5A6 PE=2 SV=2
174	1	SwissProt	TXTP_HUMAN	76	34333	2	2	2	2	0.28	Tricarboxylate transport protein, mitochondrial OS=Homo sapiens GN=SLC25A1 PE=1 SV=2
175	1	SwissProt	MRP3_HUMAN	76	170660	2	2	2	2	0.05	Canalicular multispecific organic anion transporter 2 OS=Homo sapiens GN=ABCC3 PE=1 SV=3
176	1	SwissProt	AT2A2_HUMAN	76	116336	4	4	4	4	0.16	Sarcoplasmic/endoplasmic reticulum calcium ATPase 2 OS=Homo sapiens GN=ATP2A2 PE=1 SV=1
177	1	SwissProt	IGF1R_HUMAN	75	157202	2	2	2	2	0.06	Insulin-like growth factor 1 receptor OS=Homo sapiens GN=IGF1R PE=1 SV=1
178	1	SwissProt	S12A9_HUMAN	75	96733	4	4	4	4	0.19	Solute carrier family 12 member 9 OS=Homo sapiens GN=SLC12A9 PE=1 SV=1
180	1	SwissProt	CLN3_HUMAN	73	48163	2	2	2	2	0.19	Battenin OS=Homo sapiens GN=CLN3 PE=1 SV=1
182	1	SwissProt	GNPTG_HUMAN	73	34351	3	3	2	2	0.28	N-acetylglucosamine-1-phosphotransferase subunit gamma OS=Homo sapiens GN=GNPTG PE=1 SV=1
183	1	SwissProt	TIM23_HUMAN	73	22100	2	2	2	2	0.46	Mitochondrial import inner membrane translocase subunit Tim23 OS=Homo sapiens GN=TIMM23 PE=1 SV=1
184	1	SwissProt	S26A2_HUMAN	72	82635	2	2	2	2	0.11	Sulfate transporter OS=Homo sapiens GN=SLC26A2 PE=1 SV=2
186	1	SwissProt	MUC18_HUMAN	71	72532	2	2	2	2	0.12	Cell surface glycoprotein MUC18 OS=Homo sapiens GN=MCAM PE=1 SV=2
187	1	SwissProt	SAP_HUMAN	71	59899	3	3	2	2	0.15	Prosaposin OS=Homo sapiens GN=PSAP PE=1 SV=2
188	1	SwissProt	MYCT_HUMAN	71	71181	4	4	3	3	0.2	Proton myo-inositol cotransporter OS=Homo sapiens GN=SLC2A13 PE=1 SV=3
189	1	SwissProt	RS18_HUMAN	71	17708	3	3	3	3	1.02	40S ribosomal protein S18 OS=Homo sapiens GN=RPS18 PE=1 SV=3
190	1	SwissProt	MTCH2_HUMAN	69	33936	2	2	2	2	0.28	Mitochondrial carrier homolog 2 OS=Homo sapiens GN=MTCH2 PE=1 SV=1
194	1	SwissProt	S26A6_HUMAN	68	83370	2	2	2	2	0.11	Solute carrier family 26 member 6 OS=Homo sapiens GN=SLC26A6 PE=1 SV=1
195	1	SwissProt	XPO2_HUMAN	66	111145	2	2	2	2	0.08	Exportin-2 OS=Homo sapiens GN=CSE1L PE=1 SV=3
196	1	SwissProt	ATG9A_HUMAN	65	95356	3	3	3	3	0.14	Autophagy-related protein 9A OS=Homo sapiens GN=ATG9A PE=1 SV=3
198	1	SwissProt	GRP75_HUMAN	65	73920	4	4	4	4	0.26	Stress-70 protein, mitochondrial OS=Homo sapiens GN=HSPA9 PE=1 SV=2
199	1	SwissProt	GRB2_HUMAN	65	25304	3	3	2	2	0.39	Growth factor receptor-bound protein 2 OS=Homo sapiens GN=GRB2 PE=1 SV=1
200	1	SwissProt	EFC14_HUMAN	65	55339	2	2	2	2	0.17	EF-hand calcium-binding domain-containing protein 14 OS=Homo sapiens GN=EFCAB14 PE=1 SV=1
201	1	SwissProt	MRP5_HUMAN	64	161641	2	2	2	2	0.05	Multidrug resistance-associated protein 5 OS=Homo sapiens GN=ABCC5 PE=1 SV=2
202	1	SwissProt	CTR2_HUMAN	64	72424	3	3	3	3	0.19	Cationic amino acid transporter 2 OS=Homo sapiens GN=SLC7A2 PE=1 SV=2
204	1	SwissProt	NDRG1_HUMAN	63	43264	3	3	2	2	0.22	Protein NDRG1 OS=Homo sapiens GN=NDRG1 PE=1 SV=1
206	1	SwissProt	RL11_HUMAN	63	20468	2	2	2	2	0.51	60S ribosomal protein L11 OS=Homo sapiens GN=RPL11 PE=1 SV=2
207	1	SwissProt	GNPTA_HUMAN	62	144785	3	3	3	3	0.09	N-acetylglucosamine-1-phosphotransferase subunits alpha/beta OS=Homo sapiens GN=GNPTAB PE=1 SV=1
210	1	SwissProt	QCR2_HUMAN	61	48584	2	2	2	2	0.19	Cytochrome b-c1 complex subunit 2, mitochondrial OS=Homo sapiens GN=UQCRC2 PE=1 SV=3
211	1	SwissProt	SC6A6_HUMAN	58	70867	3	3	3	3	0.2	Sodium- and chloride-dependent taurine transporter OS=Homo sapiens GN=SLC6A6 PE=1 SV=2
212	1	SwissProt	MCM7_HUMAN	58	81884	2	2	2	2	0.11	DNA replication licensing factor MCM7 OS=Homo sapiens GN=MCM7 PE=1 SV=4
213	1	SwissProt	RN149_HUMAN	58	43707	2	2	2	2	0.21	E3 ubiquitin-protein ligase RNF149 OS=Homo sapiens GN=RNF149 PE=2 SV=2
214	1	SwissProt	MCLN1_HUMAN	57	66120	2	2	2	2	0.14	Mucolipin-1 OS=Homo sapiens GN=MCOLN1 PE=1 SV=1
215	1	SwissProt	TCP4_HUMAN	56	14386	2	2	2	2	0.78	Activated RNA polymerase II transcriptional coactivator p15 OS=Homo sapiens GN=SUB1 PE=1 SV=3
216	1	SwissProt	MYOF_HUMAN	55	236100	2	2	2	2	0.04	Myoferlin OS=Homo sapiens GN=MYOF PE=1 SV=1
219	1	SwissProt	PLD3_HUMAN	54	55127	2	2	2	2	0.17	Phospholipase D3 OS=Homo sapiens GN=PLD3 PE=1 SV=1
224	1	SwissProt	RNF13_HUMAN	51	43357	3	3	2	2	0.21	E3 ubiquitin-protein ligase RNF13 OS=Homo sapiens GN=RNF13 PE=1 SV=1
226	1	SwissProt	MPCP_HUMAN	50	40525	3	3	3	3	0.37	Phosphate carrier protein, mitochondrial OS=Homo sapiens GN=SLC25A3 PE=1 SV=2
229	1	SwissProt	CA2D1_HUMAN	49	125630	2	2	2	2	0.07	Voltage-dependent calcium channel subunit alpha-2/delta-1 OS=Homo sapiens GN=CACNA2D1 PE=1 SV=3
234	1	SwissProt	FLVC1_HUMAN	49	60281	4	4	3	3	0.23	Feline leukemia virus subgroup C receptor-related protein 1 OS=Homo sapiens GN=FLVCR1 PE=1 SV=1
235	1	SwissProt	KPYM_HUMAN	49	58470	2	2	2	2	0.16	Pyruvate kinase PKM OS=Homo sapiens GN=PKM PE=1 SV=4
238	1	SwissProt	FND10_HUMAN	48	24943	2	2	2	2	0.4	Fibronectin type III domain-containing protein 10 OS=Homo sapiens GN=FNDC10 PE=3 SV=1
239	1	SwissProt	IF4B_HUMAN	47	69167	6	6	5	5	0.36	Eukaryotic translation initiation factor 4B OS=Homo sapiens GN=EIF4B PE=1 SV=2
242	1	SwissProt	TMM43_HUMAN	47	44904	2	2	2	2	0.21	Transmembrane protein 43 OS=Homo sapiens GN=TMEM43 PE=1 SV=1
244	1	SwissProt	MUC13_HUMAN	46	55710	2	2	2	2	0.16	Mucin-13 OS=Homo sapiens GN=MUC13 PE=1 SV=3
245	1	SwissProt	H2A1B_HUMAN	45	14127	4	4	2	2	0.8	Histone H2A type 1-B/E OS=Homo sapiens GN=HIST1H2AB PE=1 SV=2
247	1	SwissProt	RS14_HUMAN	44	16434	2	2	2	2	0.66	40S ribosomal protein S14 OS=Homo sapiens GN=RPS14 PE=1 SV=3
250	1	SwissProt	SMD1_HUMAN	44	13273	2	2	2	2	0.86	Small nuclear ribonucleoprotein Sm D1 OS=Homo sapiens GN=SNRPD1 PE=1 SV=1
252	1	SwissProt	EFTU_HUMAN	43	49852	2	2	2	2	0.18	Elongation factor Tu, mitochondrial OS=Homo sapiens GN=TUFM PE=1 SV=2
254	1	SwissProt	IL6RB_HUMAN	43	104498	3	3	2	2	0.08	Interleukin-6 receptor subunit beta OS=Homo sapiens GN=IL6ST PE=1 SV=2
259	1	SwissProt	LRC8D_HUMAN	42	99279	3	3	3	3	0.14	Volume-regulated anion channel subunit LRRC8D OS=Homo sapiens GN=LRRC8D PE=1 SV=1
261	1	SwissProt	MIC60_HUMAN	40	84026	2	2	2	2	0.11	MICOS complex subunit MIC60 OS=Homo sapiens GN=IMMT PE=1 SV=1
262	1	SwissProt	S61A1_HUMAN	40	52687	2	2	2	2	0.17	Protein transport protein Sec61 subunit alpha isoform 1 OS=Homo sapiens GN=SEC61A1 PE=1 SV=2
275	1	SwissProt	AT2B4_HUMAN	38	139030	3	3	3	3	0.1	Plasma membrane calcium-transporting ATPase 4 OS=Homo sapiens GN=ATP2B4 PE=1 SV=2
276	1	SwissProt	S29A1_HUMAN	37	50757	2	2	2	2	0.18	Equilibrative nucleoside transporter 1 OS=Homo sapiens GN=SLC29A1 PE=1 SV=3
277	1	SwissProt	CD70_HUMAN	37	21561	3	3	3	3	0.79	CD70 antigen OS=Homo sapiens GN=CD70 PE=1 SV=2
279	1	SwissProt	RL10A_HUMAN	37	24987	2	2	2	2	0.4	60S ribosomal protein L10a OS=Homo sapiens GN=RPL10A PE=1 SV=2
291	1	SwissProt	CSPG4_HUMAN	35	251067	3	3	2	2	0.03	Chondroitin sulfate proteoglycan 4 OS=Homo sapiens GN=CSPG4 PE=1 SV=2
294	1	SwissProt	VATA_HUMAN	34	68660	2	2	2	2	0.13	V-type proton ATPase catalytic subunit A OS=Homo sapiens GN=ATP6V1A PE=1 SV=2
303	1	SwissProt	TM87A_HUMAN	32	63788	2	2	2	2	0.14	Transmembrane protein 87A OS=Homo sapiens GN=TMEM87A PE=1 SV=3
304	1	SwissProt	TFR1_HUMAN	32	85274	2	2	2	2	0.1	Transferrin receptor protein 1 OS=Homo sapiens GN=TFRC PE=1 SV=2
306	1	SwissProt	RS27_HUMAN	29	9797	2	2	2	2	1.31	40S ribosomal protein S27 OS=Homo sapiens GN=RPS27 PE=1 SV=3
327	1	SwissProt	PRDX1_HUMAN	25	22324	2	2	2	2	0.46	Peroxiredoxin-1 OS=Homo sapiens GN=PRDX1 PE=1 SV=1
334	1	SwissProt	ITA6_HUMAN	23	127724	2	2	2	2	0.07	Integrin alpha-6 OS=Homo sapiens GN=ITGA6 PE=1 SV=5
336	1	SwissProt	H4_HUMAN	23	11360	2	2	2	2	1.07	Histone H4 OS=Homo sapiens GN=HIST1H4A PE=1 SV=2
338	1	SwissProt	CPT1A_HUMAN	23	88995	2	2	2	2	0.1	Carnitine O-palmitoyltransferase 1, liver isoform OS=Homo sapiens GN=CPT1A PE=1 SV=2
340	1	SwissProt	KCTD5_HUMAN	22	26475	2	2	2	2	0.37	BTB/POZ domain-containing protein KCTD5 OS=Homo sapiens GN=KCTD5 PE=1 SV=1
349	1	SwissProt	CENPE_HUMAN	21	317588	2	2	2	2	0.03	Centromere-associated protein E OS=Homo sapiens GN=CENPE PE=1 SV=2
361	1	SwissProt	COPT1_HUMAN	20	21190	2	2	2	2	0.48	High affinity copper uptake protein 1 OS=Homo sapiens GN=SLC31A1 PE=1 SV=1
366	1	SwissProt	CO3_HUMAN	18	188569	2	2	2	2	0.05	Complement C3 OS=Homo sapiens GN=C3 PE=1 SV=2

## Sheet: Replicate 3_PltB-S35A toxin
Family	Member	Database	Accession	Score	Mass	Num. of matches	Num. of significant matches	Num. of sequences	Num. of significant sequences	emPAI	Description
1	1	SwissProt	B3A2_HUMAN	2084	137493	64	64	26	26	1.3	Anion exchange protein 2 OS=Homo sapiens GN=SLC4A2 PE=1 SV=4
2	1	SwissProt	4F2_HUMAN	1388	68180	48	48	22	22	2.93	4F2 cell-surface antigen heavy chain OS=Homo sapiens GN=SLC3A2 PE=1 SV=3
3	1	SwissProt	TBA1C_HUMAN	1161	50548	32	32	10	10	1.31	Tubulin alpha-1C chain OS=Homo sapiens GN=TUBA1C PE=1 SV=1
3	2	SwissProt	TBA4A_HUMAN	950	50634	28	28	8	8	0.95	Tubulin alpha-4A chain OS=Homo sapiens GN=TUBA4A PE=1 SV=1
4	1	SwissProt	AT1A1_HUMAN	1116	114135	24	24	14	14	0.68	Sodium/potassium-transporting ATPase subunit alpha-1 OS=Homo sapiens GN=ATP1A1 PE=1 SV=1
5	1	SwissProt	ECE1_HUMAN	1021	87906	41	41	9	9	0.54	Endothelin-converting enzyme 1 OS=Homo sapiens GN=ECE1 PE=1 SV=2
6	1	SwissProt	MDR1_HUMAN	967	141788	29	29	15	15	0.57	Multidrug resistance protein 1 OS=Homo sapiens GN=ABCB1 PE=1 SV=3
7	1	SwissProt	AAAT_HUMAN	890	57018	23	23	7	7	0.68	Neutral amino acid transporter B(0) OS=Homo sapiens GN=SLC1A5 PE=1 SV=2
8	1	SwissProt	LAMP1_HUMAN	824	45367	18	18	5	5	0.59	Lysosome-associated membrane glycoprotein 1 OS=Homo sapiens GN=LAMP1 PE=1 SV=3
9	1	SwissProt	PODXL_HUMAN	816	59055	36	36	9	9	0.91	Podocalyxin OS=Homo sapiens GN=PODXL PE=1 SV=2
10	1	SwissProt	K2C1_HUMAN	805	66170	26	26	15	15	1.61	Keratin, type II cytoskeletal 1 OS=Homo sapiens GN=KRT1 PE=1 SV=6
10	2	SwissProt	K22E_HUMAN	373	65678	14	14	9	9	0.79	Keratin, type II cytoskeletal 2 epidermal OS=Homo sapiens GN=KRT2 PE=1 SV=2
10	3	SwissProt	K2C8_HUMAN	101	53671	3	3	3	3	0.27	Keratin, type II cytoskeletal 8 OS=Homo sapiens GN=KRT8 PE=1 SV=7
10	4	SwissProt	K2C5_HUMAN	75	62568	4	4	3	3	0.22	Keratin, type II cytoskeletal 5 OS=Homo sapiens GN=KRT5 PE=1 SV=3
10	5	SwissProt	K2C7_HUMAN	74	51411	2	2	2	2	0.18	Keratin, type II cytoskeletal 7 OS=Homo sapiens GN=KRT7 PE=1 SV=5
11	1	SwissProt	LAMP2_HUMAN	763	45503	17	17	4	4	0.45	Lysosome-associated membrane glycoprotein 2 OS=Homo sapiens GN=LAMP2 PE=1 SV=2
12	1	SwissProt	LCAP_HUMAN	744	117787	24	24	13	13	0.66	Leucyl-cystinyl aminopeptidase OS=Homo sapiens GN=LNPEP PE=1 SV=3
13	1	SwissProt	S12A4_HUMAN	740	121712	24	24	17	17	0.81	Solute carrier family 12 member 4 OS=Homo sapiens GN=SLC12A4 PE=1 SV=2
13	2	SwissProt	S12A6_HUMAN	247	128618	8	8	5	5	0.18	Solute carrier family 12 member 6 OS=Homo sapiens GN=SLC12A6 PE=1 SV=2
14	1	SwissProt	BASI_HUMAN	714	42573	24	24	7	7	1.44	Basigin OS=Homo sapiens GN=BSG PE=1 SV=2
15	1	SwissProt	S38A2_HUMAN	636	56332	14	14	4	4	0.35	Sodium-coupled neutral amino acid transporter 2 OS=Homo sapiens GN=SLC38A2 PE=1 SV=2
16	1	SwissProt	S12A2_HUMAN	608	132048	26	26	16	16	0.73	Solute carrier family 12 member 2 OS=Homo sapiens GN=SLC12A2 PE=1 SV=1
17	1	SwissProt	SATT_HUMAN	571	56087	12	12	5	5	0.46	Neutral amino acid transporter A OS=Homo sapiens GN=SLC1A4 PE=1 SV=1
18	1	SwissProt	CLCN3_HUMAN	551	91934	13	13	8	8	0.45	H(+)/Cl(-) exchange transporter 3 OS=Homo sapiens GN=CLCN3 PE=1 SV=2
18	2	SwissProt	CLCN5_HUMAN	81	84062	4	4	4	4	0.22	H(+)/Cl(-) exchange transporter 5 OS=Homo sapiens GN=CLCN5 PE=1 SV=1
19	1	SwissProt	S4A7_HUMAN	544	137098	14	14	7	7	0.24	Sodium bicarbonate cotransporter 3 OS=Homo sapiens GN=SLC4A7 PE=1 SV=2
20	1	SwissProt	K1C10_HUMAN	540	59020	20	20	10	10	1.05	Keratin, type I cytoskeletal 10 OS=Homo sapiens GN=KRT10 PE=1 SV=6
21	1	SwissProt	STEA4_HUMAN	511	52518	23	23	9	9	1.24	Metalloreductase STEAP4 OS=Homo sapiens GN=STEAP4 PE=1 SV=1
22	1	SwissProt	ADCY6_HUMAN	500	132299	13	13	6	6	0.21	Adenylate cyclase type 6 OS=Homo sapiens GN=ADCY6 PE=1 SV=2
23	1	SwissProt	SL9A6_HUMAN	498	74627	15	15	6	6	0.41	Sodium/hydrogen exchanger 6 OS=Homo sapiens GN=SLC9A6 PE=1 SV=2
24	1	SwissProt	TBB5_HUMAN	495	50095	16	16	10	10	1.33	Tubulin beta chain OS=Homo sapiens GN=TUBB PE=1 SV=2
25	1	SwissProt	MRP1_HUMAN	468	172907	15	15	12	12	0.34	Multidrug resistance-associated protein 1 OS=Homo sapiens GN=ABCC1 PE=1 SV=3
26	1	SwissProt	S38A5_HUMAN	445	52107	16	16	4	4	0.5	Sodium-coupled neutral amino acid transporter 5 OS=Homo sapiens GN=SLC38A5 PE=1 SV=1
27	1	SwissProt	S39AE_HUMAN	431	54918	13	13	4	4	0.36	Zinc transporter ZIP14 OS=Homo sapiens GN=SLC39A14 PE=1 SV=3
28	1	SwissProt	ITB1_HUMAN	383	91664	11	11	8	8	0.45	Integrin beta-1 OS=Homo sapiens GN=ITGB1 PE=1 SV=2
29	1	SwissProt	ADCY9_HUMAN	382	152828	12	12	8	8	0.25	Adenylate cyclase type 9 OS=Homo sapiens GN=ADCY9 PE=1 SV=4
30	1	SwissProt	NHRF2_HUMAN	342	37619	14	14	6	6	0.96	Na(+)/H(+) exchange regulatory cofactor NHE-RF2 OS=Homo sapiens GN=SLC9A3R2 PE=1 SV=2
31	1	SwissProt	NICA_HUMAN	339	79103	9	9	4	4	0.24	Nicastrin OS=Homo sapiens GN=NCSTN PE=1 SV=2
32	1	SwissProt	S12A7_HUMAN	338	120283	9	9	6	6	0.24	Solute carrier family 12 member 7 OS=Homo sapiens GN=SLC12A7 PE=1 SV=3
33	1	SwissProt	PTPRJ_HUMAN	319	147048	11	11	8	8	0.26	Receptor-type tyrosine-protein phosphatase eta OS=Homo sapiens GN=PTPRJ PE=1 SV=3
34	1	SwissProt	KCNK1_HUMAN	299	38632	6	6	2	2	0.24	Potassium channel subfamily K member 1 OS=Homo sapiens GN=KCNK1 PE=1 SV=1
35	1	SwissProt	PPB1_HUMAN	297	58259	7	7	6	6	0.55	Alkaline phosphatase, placental type OS=Homo sapiens GN=ALPP PE=1 SV=2
36	1	SwissProt	ACTB_HUMAN	289	42052	8	8	6	6	0.83	Actin, cytoplasmic 1 OS=Homo sapiens GN=ACTB PE=1 SV=1
37	1	SwissProt	LRC8A_HUMAN	281	95051	14	14	10	10	0.56	Volume-regulated anion channel subunit LRRC8A OS=Homo sapiens GN=LRRC8A PE=1 SV=1
38	1	SwissProt	CLCN6_HUMAN	275	98651	6	6	4	4	0.19	Chloride transport protein 6 OS=Homo sapiens GN=CLCN6 PE=1 SV=2
39	1	SwissProt	G3P_HUMAN	269	36201	6	6	4	4	0.59	Glyceraldehyde-3-phosphate dehydrogenase OS=Homo sapiens GN=GAPDH PE=1 SV=3
40	1	SwissProt	PIEZ1_HUMAN	265	289855	10	10	7	7	0.11	Piezo-type mechanosensitive ion channel component 1 OS=Homo sapiens GN=PIEZO1 PE=1 SV=4
41	1	SwissProt	RRAGC_HUMAN	246	44595	9	9	3	3	0.33	Ras-related GTP-binding protein C OS=Homo sapiens GN=RRAGC PE=1 SV=1
42	1	SwissProt	SC5A3_HUMAN	243	80497	10	10	3	3	0.17	Sodium/myo-inositol cotransporter OS=Homo sapiens GN=SLC5A3 PE=1 SV=2
43	1	SwissProt	CLCN7_HUMAN	243	89136	10	10	5	5	0.33	H(+)/Cl(-) exchange transporter 7 OS=Homo sapiens GN=CLCN7 PE=1 SV=2
44	1	SwissProt	SC6A9_HUMAN	240	79178	9	9	4	4	0.24	Sodium- and chloride-dependent glycine transporter 1 OS=Homo sapiens GN=SLC6A9 PE=1 SV=3
45	1	SwissProt	PRKDC_HUMAN	240	473749	10	10	8	8	0.07	DNA-dependent protein kinase catalytic subunit OS=Homo sapiens GN=PRKDC PE=1 SV=3
46	1	SwissProt	HSP7C_HUMAN	239	71082	9	9	8	8	0.61	Heat shock cognate 71 kDa protein OS=Homo sapiens GN=HSPA8 PE=1 SV=1
47	1	SwissProt	ITA5_HUMAN	230	115605	3	3	2	2	0.08	Integrin alpha-5 OS=Homo sapiens GN=ITGA5 PE=1 SV=2
48	1	SwissProt	EAA1_HUMAN	230	59705	5	5	3	3	0.24	Excitatory amino acid transporter 1 OS=Homo sapiens GN=SLC1A3 PE=1 SV=1
49	1	SwissProt	LG3BP_HUMAN	230	66202	6	6	4	4	0.29	Galectin-3-binding protein OS=Homo sapiens GN=LGALS3BP PE=1 SV=1
50	1	SwissProt	DAF_HUMAN	215	42400	9	9	6	6	0.82	Complement decay-accelerating factor OS=Homo sapiens GN=CD55 PE=1 SV=4
51	1	SwissProt	AT1B1_HUMAN	214	35438	8	8	5	5	1.04	Sodium/potassium-transporting ATPase subunit beta-1 OS=Homo sapiens GN=ATP1B1 PE=1 SV=1
52	1	SwissProt	NPTN_HUMAN	211	44702	6	6	3	3	0.33	Neuroplastin OS=Homo sapiens GN=NPTN PE=1 SV=2
53	1	SwissProt	GTR1_HUMAN	208	54391	7	7	4	4	0.36	Solute carrier family 2, facilitated glucose transporter member 1 OS=Homo sapiens GN=SLC2A1 PE=1 SV=2
54	1	SwissProt	MRP4_HUMAN	204	150344	11	11	8	8	0.25	Multidrug resistance-associated protein 4 OS=Homo sapiens GN=ABCC4 PE=1 SV=3
55	1	SwissProt	HS90B_HUMAN	202	83554	5	5	4	4	0.23	Heat shock protein HSP 90-beta OS=Homo sapiens GN=HSP90AB1 PE=1 SV=4
57	1	SwissProt	EGFR_HUMAN	197	137612	6	6	5	5	0.17	Epidermal growth factor receptor OS=Homo sapiens GN=EGFR PE=1 SV=2
58	1	SwissProt	ZNT1_HUMAN	195	56290	8	8	4	4	0.35	Zinc transporter 1 OS=Homo sapiens GN=SLC30A1 PE=1 SV=3
59	1	SwissProt	LAT1_HUMAN	191	55659	7	7	3	3	0.26	Large neutral amino acids transporter small subunit 1 OS=Homo sapiens GN=SLC7A5 PE=1 SV=2
59	2	SwissProt	YLAT2_HUMAN	98	57532	5	5	2	2	0.16	Y+L amino acid transporter 2 OS=Homo sapiens GN=SLC7A6 PE=1 SV=3
60	1	SwissProt	CD44_HUMAN	191	82001	4	4	2	2	0.11	CD44 antigen OS=Homo sapiens GN=CD44 PE=1 SV=3
61	1	SwissProt	KVD26_HUMAN	185	13403	3	3	2	2	0.85	Immunoglobulin kappa variable 2D-26 OS=Homo sapiens GN=IGKV2D-26 PE=3 SV=1
62	1	SwissProt	ADT2_HUMAN	178	33059	8	8	6	6	1.15	ADP/ATP translocase 2 OS=Homo sapiens GN=SLC25A5 PE=1 SV=7
62	2	SwissProt	ADT3_HUMAN	125	33073	6	6	4	4	0.66	ADP/ATP translocase 3 OS=Homo sapiens GN=SLC25A6 PE=1 SV=4
63	1	SwissProt	ALBU_HUMAN	177	71317	4	4	2	2	0.13	Serum albumin OS=Homo sapiens GN=ALB PE=1 SV=2
64	1	SwissProt	VPP1_HUMAN	173	97148	5	5	5	5	0.24	V-type proton ATPase 116 kDa subunit a isoform 1 OS=Homo sapiens GN=ATP6V0A1 PE=1 SV=3
65	1	SwissProt	PHB2_HUMAN	166	33276	4	4	3	3	0.46	Prohibitin-2 OS=Homo sapiens GN=PHB2 PE=1 SV=2
66	1	SwissProt	ITA1_HUMAN	163	132304	6	6	6	6	0.21	Integrin alpha-1 OS=Homo sapiens GN=ITGA1 PE=1 SV=2
67	1	SwissProt	TPC1_HUMAN	156	94599	6	6	4	4	0.2	Two pore calcium channel protein 1 OS=Homo sapiens GN=TPCN1 PE=1 SV=3
68	1	SwissProt	ATPB_HUMAN	155	56525	5	5	5	5	0.45	ATP synthase subunit beta, mitochondrial OS=Homo sapiens GN=ATP5B PE=1 SV=3
69	1	SwissProt	CD63_HUMAN	150	26474	4	4	2	2	0.61	CD63 antigen OS=Homo sapiens GN=CD63 PE=1 SV=2
70	1	SwissProt	CTR1_HUMAN	147	68449	7	7	3	3	0.2	High affinity cationic amino acid transporter 1 OS=Homo sapiens GN=SLC7A1 PE=1 SV=1
71	1	SwissProt	S38A1_HUMAN	143	54639	7	7	3	3	0.26	Sodium-coupled neutral amino acid transporter 1 OS=Homo sapiens GN=SLC38A1 PE=1 SV=1
72	1	SwissProt	SURF4_HUMAN	138	30602	3	3	2	2	0.32	Surfeit locus protein 4 OS=Homo sapiens GN=SURF4 PE=1 SV=3
73	1	SwissProt	FOLH1_HUMAN	127	84506	4	4	2	2	0.11	Glutamate carboxypeptidase 2 OS=Homo sapiens GN=FOLH1 PE=1 SV=1
74	1	SwissProt	NRAM2_HUMAN	124	62852	7	7	3	3	0.22	Natural resistance-associated macrophage protein 2 OS=Homo sapiens GN=SLC11A2 PE=1 SV=2
75	1	SwissProt	ERP44_HUMAN	124	47341	4	4	3	3	0.31	Endoplasmic reticulum resident protein 44 OS=Homo sapiens GN=ERP44 PE=1 SV=1
76	1	SwissProt	RS27A_HUMAN	124	18296	3	3	2	2	0.58	Ubiquitin-40S ribosomal protein S27a OS=Homo sapiens GN=RPS27A PE=1 SV=2
77	1	SwissProt	MUC1_HUMAN	122	122200	3	3	3	3	0.11	Mucin-1 OS=Homo sapiens GN=MUC1 PE=1 SV=3
78	1	SwissProt	NPC1_HUMAN	118	144868	3	3	3	3	0.09	Niemann-Pick C1 protein OS=Homo sapiens GN=NPC1 PE=1 SV=2
79	1	SwissProt	ABCB6_HUMAN	118	94396	4	4	3	3	0.14	ATP-binding cassette sub-family B member 6, mitochondrial OS=Homo sapiens GN=ABCB6 PE=1 SV=1
81	1	SwissProt	VA0D1_HUMAN	115	40759	6	6	5	5	0.68	V-type proton ATPase subunit d 1 OS=Homo sapiens GN=ATP6V0D1 PE=1 SV=1
83	1	SwissProt	AT133_HUMAN	111	139778	5	5	5	5	0.16	Probable cation-transporting ATPase 13A3 OS=Homo sapiens GN=ATP13A3 PE=1 SV=4
85	1	SwissProt	STK38_HUMAN	109	54498	4	4	3	3	0.26	Serine/threonine-protein kinase 38 OS=Homo sapiens GN=STK38 PE=1 SV=1
86	1	SwissProt	HACD3_HUMAN	105	43360	3	3	2	2	0.21	Very-long-chain (3R)-3-hydroxyacyl-CoA dehydratase 3 OS=Homo sapiens GN=HACD3 PE=1 SV=2
87	1	SwissProt	TMEM9_HUMAN	105	21074	3	3	2	2	0.49	Transmembrane protein 9 OS=Homo sapiens GN=TMEM9 PE=1 SV=1
88	1	SwissProt	VDAC2_HUMAN	103	32060	3	3	3	3	0.48	Voltage-dependent anion-selective channel protein 2 OS=Homo sapiens GN=VDAC2 PE=1 SV=2
89	1	SwissProt	S12A9_HUMAN	103	96733	5	5	3	3	0.14	Solute carrier family 12 member 9 OS=Homo sapiens GN=SLC12A9 PE=1 SV=1
90	1	SwissProt	MPCP_HUMAN	102	40525	5	5	3	3	0.37	Phosphate carrier protein, mitochondrial OS=Homo sapiens GN=SLC25A3 PE=1 SV=2
92	1	SwissProt	H2B1B_HUMAN	100	13942	2	2	2	2	0.81	Histone H2B type 1-B OS=Homo sapiens GN=HIST1H2BB PE=1 SV=2
93	1	SwissProt	L1CAM_HUMAN	98	140885	3	3	3	3	0.09	Neural cell adhesion molecule L1 OS=Homo sapiens GN=L1CAM PE=1 SV=2
95	1	SwissProt	OSTM1_HUMAN	95	38031	3	3	2	2	0.25	Osteopetrosis-associated transmembrane protein 1 OS=Homo sapiens GN=OSTM1 PE=1 SV=1
96	1	SwissProt	SERA_HUMAN	94	57356	5	5	3	3	0.25	D-3-phosphoglycerate dehydrogenase OS=Homo sapiens GN=PHGDH PE=1 SV=4
98	1	SwissProt	MYOF_HUMAN	90	236100	3	3	2	2	0.04	Myoferlin OS=Homo sapiens GN=MYOF PE=1 SV=1
99	1	SwissProt	MCLN1_HUMAN	89	66120	3	3	2	2	0.14	Mucolipin-1 OS=Homo sapiens GN=MCOLN1 PE=1 SV=1
100	1	SwissProt	LDLR_HUMAN	88	98906	3	3	3	3	0.14	Low-density lipoprotein receptor OS=Homo sapiens GN=LDLR PE=1 SV=1
101	1	SwissProt	SC6A6_HUMAN	87	70867	3	3	3	3	0.2	Sodium- and chloride-dependent taurine transporter OS=Homo sapiens GN=SLC6A6 PE=1 SV=2
102	1	SwissProt	RAI3_HUMAN	87	40624	4	4	4	4	0.52	Retinoic acid-induced protein 3 OS=Homo sapiens GN=GPRC5A PE=1 SV=2
103	1	SwissProt	RRAGA_HUMAN	86	36942	4	4	3	3	0.41	Ras-related GTP-binding protein A OS=Homo sapiens GN=RRAGA PE=1 SV=1
104	1	SwissProt	RNF13_HUMAN	86	43357	3	3	2	2	0.21	E3 ubiquitin-protein ligase RNF13 OS=Homo sapiens GN=RNF13 PE=1 SV=1
105	1	SwissProt	EAA3_HUMAN	85	57405	3	3	2	2	0.16	Excitatory amino acid transporter 3 OS=Homo sapiens GN=SLC1A1 PE=1 SV=2
107	1	SwissProt	CTR2_HUMAN	84	72424	4	4	3	3	0.19	Cationic amino acid transporter 2 OS=Homo sapiens GN=SLC7A2 PE=1 SV=2
108	1	SwissProt	QCR2_HUMAN	83	48584	2	2	2	2	0.19	Cytochrome b-c1 complex subunit 2, mitochondrial OS=Homo sapiens GN=UQCRC2 PE=1 SV=3
109	1	SwissProt	NAGPA_HUMAN	83	57634	4	4	3	3	0.25	N-acetylglucosamine-1-phosphodiester alpha-N-acetylglucosaminidase OS=Homo sapiens GN=NAGPA PE=1 SV=2
112	1	SwissProt	XPO1_HUMAN	74	124447	3	3	3	3	0.11	Exportin-1 OS=Homo sapiens GN=XPO1 PE=1 SV=1
115	1	SwissProt	1433T_HUMAN	73	28032	3	3	2	2	0.35	14-3-3 protein theta OS=Homo sapiens GN=YWHAQ PE=1 SV=1
116	1	SwissProt	RO52_HUMAN	69	55162	3	3	3	3	0.26	E3 ubiquitin-protein ligase TRIM21 OS=Homo sapiens GN=TRIM21 PE=1 SV=1
117	1	SwissProt	MRP3_HUMAN	69	170660	2	2	2	2	0.05	Canalicular multispecific organic anion transporter 2 OS=Homo sapiens GN=ABCC3 PE=1 SV=3
118	1	SwissProt	LEG3_HUMAN	68	26193	4	4	3	3	0.62	Galectin-3 OS=Homo sapiens GN=LGALS3 PE=1 SV=5
119	1	SwissProt	LRP1_HUMAN	68	523150	3	3	3	3	0.02	Prolow-density lipoprotein receptor-related protein 1 OS=Homo sapiens GN=LRP1 PE=1 SV=2
120	1	SwissProt	ANM5_HUMAN	68	73322	3	3	2	2	0.12	Protein arginine N-methyltransferase 5 OS=Homo sapiens GN=PRMT5 PE=1 SV=4
122	1	SwissProt	PPIA_HUMAN	66	18229	2	2	2	2	0.58	Peptidyl-prolyl cis-trans isomerase A OS=Homo sapiens GN=PPIA PE=1 SV=2
123	1	SwissProt	EF1G_HUMAN	65	50429	2	2	2	2	0.18	Elongation factor 1-gamma OS=Homo sapiens GN=EEF1G PE=1 SV=3
124	1	SwissProt	LRC8E_HUMAN	65	91387	5	5	3	3	0.15	Volume-regulated anion channel subunit LRRC8E OS=Homo sapiens GN=LRRC8E PE=1 SV=2
126	1	SwissProt	FOLR1_HUMAN	63	30712	2	2	2	2	0.31	Folate receptor alpha OS=Homo sapiens GN=FOLR1 PE=1 SV=3
131	1	SwissProt	ARF4_HUMAN	59	20612	3	3	2	2	0.5	ADP-ribosylation factor 4 OS=Homo sapiens GN=ARF4 PE=1 SV=3
138	1	SwissProt	EZRI_HUMAN	56	69484	2	2	2	2	0.13	Ezrin OS=Homo sapiens GN=EZR PE=1 SV=4
139	1	SwissProt	ENOA_HUMAN	55	47481	2	2	2	2	0.19	Alpha-enolase OS=Homo sapiens GN=ENO1 PE=1 SV=2
140	1	SwissProt	EF1A1_HUMAN	55	50451	2	2	2	2	0.18	Elongation factor 1-alpha 1 OS=Homo sapiens GN=EEF1A1 PE=1 SV=1
146	1	SwissProt	RS3_HUMAN	52	26842	2	2	2	2	0.37	40S ribosomal protein S3 OS=Homo sapiens GN=RPS3 PE=1 SV=2
147	1	SwissProt	ATPA_HUMAN	51	59828	2	2	2	2	0.15	ATP synthase subunit alpha, mitochondrial OS=Homo sapiens GN=ATP5A1 PE=1 SV=1
159	1	SwissProt	1A02_HUMAN	44	41181	2	2	2	2	0.23	HLA class I histocompatibility antigen, A-2 alpha chain OS=Homo sapiens GN=HLA-A PE=1 SV=1
174	1	SwissProt	HBA_HUMAN	36	15305	2	2	2	2	0.72	Hemoglobin subunit alpha OS=Homo sapiens GN=HBA1 PE=1 SV=2
177	1	SwissProt	CDK5_HUMAN	35	33739	2	2	2	2	0.28	Cyclin-dependent-like kinase 5 OS=Homo sapiens GN=CDK5 PE=1 SV=3
189	1	SwissProt	LTOR1_HUMAN	32	17848	2	2	2	2	0.59	Ragulator complex protein LAMTOR1 OS=Homo sapiens GN=LAMTOR1 PE=1 SV=2
195	1	SwissProt	ATG9A_HUMAN	30	95356	2	2	2	2	0.09	Autophagy-related protein 9A OS=Homo sapiens GN=ATG9A PE=1 SV=3
201	1	SwissProt	CLUS_HUMAN	28	53031	2	2	2	2	0.17	Clusterin OS=Homo sapiens GN=CLU PE=1 SV=1
211	1	SwissProt	LMBD2_HUMAN	25	81861	2	2	2	2	0.11	LMBR1 domain-containing protein 2 OS=Homo sapiens GN=LMBRD2 PE=1 SV=1
213	1	SwissProt	K1C9_HUMAN	25	62255	2	2	2	2	0.15	Keratin, type I cytoskeletal 9 OS=Homo sapiens GN=KRT9 PE=1 SV=3
229	1	SwissProt	ADCY7_HUMAN	21	122568	2	2	2	2	0.07	Adenylate cyclase type 7 OS=Homo sapiens GN=ADCY7 PE=2 SV=1
