# Supplementary material for: Typhoid toxin sorting and exocytic transport from Salmonella Typhi-infected cells
Source: eLife. 2022 May 17;11:e78561. doi: 10.7554/eLife.78561 (PMC9142146; doi:10.7554/eLife.78561)
Supplement: Figure 1—source data 4. [file elife-78561-fig1-data4.xlsx]

## Sheet: Replicate 1
Raw data for Fig. 1d: SCV/CI-M6PR colocalization
	4 hr	24 hr
	0.009	0.99
	0.005	0.917
	0.208	0.647
	0.069	0.911
	0.175	0.817
	0.016	0.895
	0.052	0.971
	0.102	0.945
	0.022	0.688
	0.012	0.82
	0	0.634
	0.384	0.85
	0.067	0.51
	0.056	0.77
	0.063	0.749
		0.634
		0.936
		0.591
		0.508
		0.713
		0.835
		0.571
		0.796
Average	0.0826667	0.769478

## Sheet: Replicate 2
Time point	4 hr	24 hr
	0.007	0.633
	0.077	0.714
	0.105	0.358
	0.458	0.668
	0.083	0.494
	0.581	0.74
	0.247	0.654
	0.189	0.632
	0.402	0.427
	0.432	0.619
	0.364	0.581
	0.057	0.623
Raw data for Fig. 1d: SCV/CI-M6PR colocalization
	4hs	24 hs
	0.076	0.581
	0.066	0.856
	0.106	0.651
	0.168	0.538
	0.118	0.701
	0.298	0.857
	0.172	0.801
	0.309	0.455
	0.109	0.629
	0.164	0.604
	0.008	0.497
	0.013	0.509
	0	0.578
	0.061	0.611
	0.018	0.554
	0.046	0.745
	0.122	0.845
	0.077	0.752
	0.085	0.505
	0.009	0.504
	0.071	0.717
	0.051	0.496
	0.035	0.615
	0	0.734
	0.111	0.741
	0.043
Average	0.140474	0.627541
