# Supplementary material for: Typhoid toxin sorting and exocytic transport from Salmonella Typhi-infected cells
Source: eLife. 2022 May 17;11:e78561. doi: 10.7554/eLife.78561 (PMC9142146; doi:10.7554/eLife.78561)
Supplement: Figure 2—source data 2. [file elife-78561-fig2-data2.xlsx]

## Sheet: related to Fig 2b
CFU	4hr	4hr	24hr	24hr	48hr	48hr
Parental cells	57000	47500	1900000	2200000	61000000	76000000
CI-M6PR cells	65000	69500	2900000	3900000	88000000	63500000

## Sheet: related to Fig 2c
Replicate 1							Replicate 2
	Parental cell		CI-M6PR KO					Parental cell		CI-M6PR KO
	G0G1 (%)	G2M (%)	G0G1 (%)	G2M (%)				G0G1 (%)	G2M (%)	G0G1 (%)	G2M (%)
0 pM	58.8	29.1	55.8	29.7			0 pM	53.9	30.3	53.2	31.9
0.015 pM	51.4	33.9	48	41.5			0.015 pM	39	48.4	34.5	53
0.03 pM	46	41.1	36.4	53.9			0.03 pM	27.9	62.1	23.8	65.6
0.06 pM	31.9	56.3	26.7	65.8			0.06 pM	13.1	79.7	7.34	78.9
0.12 pM	17.8	73.2	13	81.1			0.12 pM	5.04	91.7	12.9	89.2
0.25 pM	6.59	88.5	5.36	91			0.25 pM	1.84	95.5	4.16	92.8

## Sheet: related to Fig 2e
TT puncta-associated fluorescece intensity
Replicate 1			Replicate 2			Replicate 3
Parental	CI-M6PR-/-		Parental	CI-M6PR-/-		Parental	CI-M6PR-/-
0.0323962	0.0177962		0.0271338	0.00895054		0.0328055	0.0133613
0.134471	0.00801602		0.0226874	0.021638		0.0477894	0.0265804
0.0179968	0.0049627		0.0282988	0.00786935		0.0169968	0.00950782
0.0241439	0.016368		0.0099488	0.0287456		0.0585563	0.0623514
0.0484385	0.0210217		0.180515	0.0101933		0.0102504	0.0132787
0.0532885	0.0229986		0.0538428	0.00372287		0.0367396	0.00452724
0.231018	0.00774736		0.0321614	0.0520418		0.0156516	0.00697875
0.0210799	0.0203596		0.055491	0.0105986		0.0223255	0.00994333
0.0160777	0.00993491		0.0424635	0.0292211		0.023091	0.0205198
0.00529744	0.0222108		0.0356904	0.0049358		0.0275464	0.0138462
0.104305	0.0108162		0.0577472	0.00564112		0.0270358	0.0164216
0.081953	0.0366124		0.0838215	0.00598084		0.0262761	0.0314936
0.0508738	0.0223568		0.146432	0.0313072		0.0780656	0.00414567
0.0978813	0.0475252		0.0232593	0.0139876		0.0646241	0.00479598
0.036577	0.0114049		0.0163688	0.0278543		0.0400107	0.0118148
0.0594101	0.0236981		0.0157232	0.0168273		0.114525	0.0129458
0.0377135	0.0126609		0.107205	0.00728581		0.128114	0.00416117
0.0459927	0.0486985		0.064111	0.0286561		0.0361336	0.00307474
0.0776033	0.023519		0.0292985	0.00626425		0.095331	0.028404
0.044012	0.0149932		0.178465	0.0862713		0.0217838	0.01137
0.0272196	0.0211967		0.0757091	0.00796923		0.0928336	0.0239032
0.028949	0.0300206		0.0273874	0.014815		0.0414276	0.0253597
0.0277581	0.0112231		0.0561309	0.0173019		0.0113598	0.00754554
0.127549	0.00895941		0.0697714	0.0203794		0.0581339	0.0100141
0.0890494	0.0133234		0.127955	0.00761055		0.0240746	0.025049
0.0316849	0.0130797		0.0304074	0.00833424		0.0311465	0.0152713
0.348978	0.0283467		0.0577304	0.00228395		0.0699573	0.0461647
0.0926636	0.046049		0.0441678	0.0427512		0.0608674	0.0147155
0.0253837	0.0145952		0.0686265	0.0140024		0.0721621	0.0175869
0.238003	0.0166501		0.0224253	0.0148698		0.0329338	0.0119941

## Sheet: related to Fig 2f and 2g
Replicate 1								Replicate 2								Replicate 3
	Parental		CI-M6PR KO-1		CI-M6PR KO-2				Parental		CI-M6PR KO-1		CI-M6PR KO-2				Parental		CI-M6PR KO-1		CI-M6PR KO-2
Dilution	G0G1	G2M	G0G1	G2M	G0G1	G2M		Dilution	G0G1	G2M	G0G1	G2M	G0G1	G2M		Dilution	G0G1	G2M	G0G1	G2M	G0G1	G2M
32x	0.9	97.2	3.55	93.3	6.43	87.8		4x	2.04	90.6	14.8	71.2	9.04	79.7		4x	15	70.2	40.7	37.6	36.6	39.9
64x	2.52	94	10.7	84.6	11.3	80.2		8x	5.23	87.5	27.5	52.4	18.3	65.4		8x	26.3	52.5	45.9	27.9	45.6	31.9
128x	4.82	91.2	18.9	69.9	25.2	64.9		16x	10.6	78.7	48	38.3	32.8	46.6		16x	37.7	39	51.1	21	44.2	28
								32x	20.3	65.8	42.8	27.4	39.4	37.7		32x	45.5	32.5	50.3	21.2	50.2	21.6
								64x	27.9	55.1	50.3	23.9	43.8	31.6		64x	45.1	26.2	52	19	52.1	19.9
								128x	38.2	40.7	51.9	22	51.6	24.3		128x	47.6	24.6	51.6	18.9	50.7	21.7
