# Supplementary material for: Typhoid toxin sorting and exocytic transport from Salmonella Typhi-infected cells
Source: eLife. 2022 May 17;11:e78561. doi: 10.7554/eLife.78561 (PMC9142146; doi:10.7554/eLife.78561)
Supplement: Figure 3—source data 1. [file elife-78561-fig3-data1.xlsx]

## Sheet: Related to Fig3a
Replicate 1			Replicate 2			Replicate 3
S. Typhi	S. Typhimurium		S. Typhi	S. Typhimurium		S. Typhi	S. Typhimurium
0.95	0.27		0.717	0.007		0.633	0.012
0.95	0.5		0.578	0.099		0.714	0.031
1	1			0.084		0.358	0.109
0.9	0		0.791	0.063		0.668	0.045
0.75	0.27		0.55	0.003		0.494	0.064
0.88	0.57		0.738	0.18		0.74	0.384
0.63	0.4		0.808	0		0.654	0.126
0.57	0.4		0.669	0.113		0.632	0.083
0.87	0.67		0.63	0.162		0.427	0.262
1	0		0.461	0.468		0.619	0.041
0.94	0.12		0.353	0.147		0.581	0.009
1	0.33		0.354	0.079		0.623	0.064
0.75	0.27		0.745	0.054		0.581	0.045
0.83	0		0.594	0.172		0.856	0.195
1	0.5		0.651	0.05		0.651	0.031
0.87	0.33		0.325	0.033		0.538	0.086
0.75	0.25		0.665	0.088		0.701	0.074
1	0.25		0.594	0.231		0.857	0.056
0.87	0		0.848	0		0.801	0.197
0.91	0		0.831	0		0.455	0.016
0.77	0.62		0.576	0.132		0.629	0.155
0.69	0.52		0.653	0.275		0.604	0.003
0.75	0.5		0.586	0.012		0.497	0.117
1	0		0.43	0		0.509	0.522
	0.28		0.818	0.181		0.578	0.011
	0.32		0.798	0.003		0.611	0.063
	0.28		0.957	0.058		0.554	0.236
			0.729			0.745	0.101
			0.468			0.845	0.364
			0.857			0.752	0.112
			0.749			0.505	0.082
						0.504	0.071
						0.717	0.077
						0.496	0.058
						0.615	0
						0.734	0.465
						0.741	0.081

## Sheet: Related to Fig3b
TT puncta-associated fluorescece intensity
Replicate 1			Replicate 2
S. Ty	S.Tm_TT		S. Ty	S.Tm_TT
0.0478415	0.0194587		0.0401599	0.00929181
0.0971625	0.0328636		0.042764	0.017309
0.117357	0.0165126		0.0758595
0.0542268	0.0224861		0.0260177	0.0199247
0.0928034	0.00469022		0.0223609	0.0136417
0.0481347	0.0236563		0.0402059	0.0231104
0.036075	0.0104194		0.0765895	0.0498841
0.07515	0.0668597		0.0263104	0.0546827
0.0132918	0.0088908		0.121846	0.0163712
0.028233	0.0320316		0.075629	0.0168676
0.0365012	0.0190311		0.132115	0.024277
0.0628599	0.0253435		0.0477332	0.0256085
0.0438979	0.0119915		0.0578506	0.0226622
0.0998498	0.0433075		0.0168742	0.0281879
0.106778	0.0169355		0.064066	0.0565113
0.101542	0.0261123		0.018439	0.00812229
0.0292151	0.0199332		0.0344351	0.0663582
0.0920981	0.0136014		0.0411944	0.0471104
0.0913495	0.0307811		0.0291593	0.0140675
0.0179331	0.0275816		0.0329888	0.0334487
0.0876822	0.0338367		0.0533839	0.0122807
0.0780949	0.0103952		0.0682264	0.00968001
0.0341911	0.0758179		0.0368083	0.0031433
0.0581348	0.024508		0.0222936	0.0129373
0.0721071	0.0596842		0.0178293	0.0182418
0.0499732	0.00731717		0.0421549	0.0196851
0.141433	0.0157328		0.0245602	0.0235497
0.122902	0.0296778		0.0301361	0.0160685
0.041207	0.000881526		0.0229753	0.0388212
0.0700828	0.00247698		0.0292959	0.00771313

## Sheet: Related to Fig3c
Replicate_062520										Replicate_072619					Replicate_092619				Replicate_061919			Replicate_061820						Replicate_062020							Replicate_101319			Replicate_082619				Replicate_022120			Replicate_090419
WT	GtgE	SopD2	GtgA	SteB	SspH1	SseI	SpvC	SpvD		WT	GtgE	SopD2	SteB		WT	GtgA	GogB		WT	SteB		WT	SlrP	SseK1	SseK2	SseK3		WT	SlrP	SspH1	SseK1	SseK2	SseK3		WT	GogB		WT	SseI	SseJ		WT	SseJ		WT	SpvC	SpvD
0.498	0.472	0.153	0.532	0.455	0.737	0.599	0.417	0.678		0.521	0.635	0.556	0.368		0.531	0.628	0.41		0.292	0.467		0.397	0.637	0.425	0.452	0.732		0.587	0.485	0.634	0.441	0.287	0.542		0.819	0.225		0.596	0.759	0.535		0.676	0.413		0.426	0.276	0.477
0.469	0.587	0.17	0.485	0.496	0.667	0.65	0.338	0.619		0.571	0.231	0.596	0.333		0.847	0.678	0.35		0.16	0.21		0.582	0.648	0.478	0.548	0.795		0.499	0.315	0.513	0.488	0.445	0.508		0.46	0.481		0.406	0.887	0.206		0.695	0.3		0.452	0.174	0.517
0.588	0.349	0.298	0.669	0.345	0.537	0.474	0.543	0.304		0.798	0.395	0.369	0.537		0.642	0.685	0.207		0.324	0.49		0.445	0.648	0.558	0.497	0.493		0.714	0.402	0.583	0.235	0.598	0.305		0.488	0.485		0.458	0.641	0.125		0.655	0.252		0.246	0.149	0.503
0.581	0.33	0.404	0.366	0.244	0.543	0.285	0.379	0.644		0.567	0.463	0.523	0.571		0.655	0.631	0.479		0.15	0.287		0.472	0.606	0.716	0.604	0.709		0.807	0.177	0.481	0.468	0.31	0.452		0.58	0.491		0.838	0.524	0.179		0.493	0.169		0.306	0.291	0.464
0.846	0.543	0.45	0.487	0.426	0.602	0.458	0.344	0.526		0.433	0.54	0.411	0.338		0.457	0.529	0.618		0.37	0.419		0.404	0.712	0.749	0.4	0.467		0.549	0.31	0.745	0.246	0.431	0.457		0.48	0.421		0.606	0.626	0.454		0.673	0.327		0.68	0.155	0.532
0.61	0.539	0.364	0.534	0.461	0.433	0.439	0.305	0.506		0.314	0.395	0.372	0.381		0.715	0.47	0.616		0.328	0.149		0.656	0.593	0.52	0.549	0.431		0.692	0.193	0.716	0.489	0.237	0.625		0.557	0.61		0.694	0.592	0.235		0.799	0.48		0.229	0.269	0.376
0.57	0.608	0.309	0.553	0.341	0.447	0.415	0.278	0.495		0.603	0.4	0.431	0.556		0.541	0.401	0.497		0.38	0.409		0.406	0.415	0.537	0.345	0.718		0.209	0.484	0.575	0.407	0.353	0.464		0.583	0.557		0.529	0.635	0.42		0.461	0.384		0.24	0.3	0.428
0.507	0.381	0.418	0.46	0.346	0.6	0.441	0.302	0.463		0.575	0.749	0.521	0.381		0.405	0.414	0.108		0.311	0.171		0.401	0.561	0.547	0.454	0.602		0.382	0.475	0.664	0.425	0.308	0.549		0.666	0.595		0.733	0.509	0.312		0.603	0.219		0.27	0.322	0.354
0.568	0.432	0.485	0.335	0.431	0.429	0.527	0.4	0.467		0.653	0.499	0.288	0.547		0.62	0.275	0.305		0.553	0.225		0.642	0.611	0.465	0.698	0.631		0.361	0.698	0.522	0.296	0.432	0.535		0.813	0.45		0.326	0.581	0.167		0.58	0.317		0.24	0.411	0.355
0.446	0.495	0.337	0.618	0.411	0.437	0.605	0.448	0.635		0.466	0.348	0.438	0.475		0.367	0.481	0.566		0.475	0.381		0.731	0.809	0.563	0.607	0.571		0.402	0.384	0.48	0.343	0.462	0.562		0.512	0.549		0.79	0.843	0.266		0.71	0.318		0.463	0.328	0.411
0.439	0.55	0.381	0.452	0.331	0.474	0.541	0.296	0.515		0.461	0.331	0.229	0.466		0.572	0.414	0.415			0.476		0.748	0.453	0.673	0.452	0.594		0.572	0.525	0.638	0.446	0.413	0.373		0.744	0.298		0.743	0.796	0.332		0.702	0.519		0.337	0.605	0.381
0.358	0.645	0.627	0.464	0.394	0.598	0.318	0.492	0.489		0.449	0.573	0.204	0.644		0.369	0.684	0.48					0.795	0.681	0.562	0.381	0.667		0.364	0.454	0.454	0.701	0.295	0.124		0.672	0.334		0.525	0.698	0.572		0.723	0.181		0.246	0.498	0.282
0.598	0.633	0.346	0.427	0.461	0.37	0.355	0.44	0.36		0.591	0.666	0.374	0.467		0.325	0.433	0.578					0.635	0.602	0.556	0.618	0.7		0.589	0.616	0.442	0.352	0.588	0.416		0.629	0.554		0.416	0.329	0.353		0.662	0.219		0.302	0.374	0.302
0.233	0.505	0.331	0.37	0.485	0.498	0.563	0.2	0.425		0.363	0.532	0.24	0.378		0.514	0.216	0.429					0.387	0.593	0.377	0.547	0.566		0.42	0.663	0.596	0.499	0.425	0.302		0.534	0.405		0.659	0.642	0.18		0.742	0.137		0.159	0.288	0.364
0.441	0.514	0.351	0.393	0.545	0.431	0.652	0.312	0.347		0.598	0.64	0.499	0.32		0.537	0.323	0.399					0.469	0.671	0.725	0.337	0.423		0.191	0.381	0.619	0.433	0.304	0.335		0.809	0.54		0.432	0.446	0.303		0.72	0.12		0.174	0.535	0.576
0.235	0.488	0.646	0.317	0.405	0.385	0.636	0.342	0.373			0.493	0.587	0.476		0.45	0.497	0.299					0.618	0.465	0.454	0.476	0.694		0.371	0.4	0.703	0.337	0.714	0.36		0.646	0.539		0.678	0.296	0.692		0.488	0.249		0.211		0.3
0.304	0.457	0.435	0.302	0.41	0.555	0.497	0.436	0.443			0.186		0.384		0.5	0.538	0.819					0.563	0.538	0.91	0.618	0.796		0.333	0.43	0.68	0.228	0.456	0.518		0.696	0.687		0.483	0.303	0.354		0.525	0.136		0.252		0.459
0.28	0.296	0.527	0.397	0.132	0.399	0.472	0.22	0.436			0.557		0.463		0.39	0.373	0.388					0.657	0.815	0.443	0.548	0.653		0.668	0.52	0.305	0.662	0.364	0.573		0.75	0.667		0.703	0.79	0.68		0.639	0.157
0.347	0.347	0.49	0.271	0.315	0.421	0.442	0.294	0.515			0.526				0.44	0.604	0.73					0.706	0.66	0.779	0.504	0.646		0.486	0.338	0.362	0.762	0.374	0.62		0.675	0.456		0.504	0.673	0.281		0.785	0.47
0.519	0.388	0.33	0.468	0.482	0.386	0.62	0.236	0.24			0.663				0.32	0.448	0.452					0.44	0.555	0.667	0.613	0.569		0.382	0.349	0.629	0.38	0.287	0.565		0.793	0.39		0.581	0.53	0.296		0.858	0.184
0.312	0.601	0.313	0.284	0.421	0.236	0.496	0.374	0.478							0.243	0.495	0.45					0.489	0.614	0.771	0.66	0.627		0.332	0.384	0.52	0.522	0.323	0.65		0.673	0.45		0.59	0.181	0.255			0.069
0.55	0.384	0.324	0.395	0.285	0.295	0.599	0.459	0.433							0.27	0.595	0.552					0.486	0.503	0.67	0.456	0.597		0.606	0.617	0.505	0.6	0.346	0.292		0.765	0.436		0.562	0.387	0.275			0.129
0.752	0.547	0.307	0.428	0.332	0.291	0.348	0.549	0.423							0.401	0.453	0.549					0.492	0.652	0.543	0.536	0.579		0.437	0.512	0.586	0.454	0.652	0.525		0.712	0.501		0.687	0.349	0.423			0.307
0.347	0.486	0.398	0.353	0.361	0.303	0.632	0.359	0.515							0.339	0.429	0.519					0.448	0.588	0.494	0.485	0.557		0.489	0.552	0.619	0.21	0.183	0.326		0.54	0.295		0.571	0.154	0.4			0.646
0.444	0.681		0.499	0.493	0.286	0.245	0.284	0.715							0.408	0.548	0.44					0.611	0.561	0.55	0.384	0.75		0.493	0.792	0.497	0.41	0.385	0.46		0.684	0.559		0.448	0.929	0.234
0.36	0.132		0.469	0.529	0.383	0.98	0.37	0.725							0.297	0.461	0.39					0.642	0.571	0.389	0.441	0.629		0.551		0.5	0.407	0.463	0.508			0.643		0.437	0.67	0.506
0.313	0.148		0.422	0.543	0.212	0.434	0.332	0.663							0.301	0.436	0.1					0.524	0.599	0.604	0.466	0.485		0.529		0.41	0.561	0.513	0.364			0.639		0.646	0.784	0.604
0.374	0.461		0.354	0.328	0.414	0.327	0.387	0.39							0.482	0.506	0.298					0.48	0.626	0.3	0.629	0.601		0.381		0.671	0.439	0.309	0.492					0.653	0.524	0.054
0.581	0.244		0.474	0.466	0.417	0.444	0.246	0.582							0.344	0.534	0.208					0.492	0.324	0.593	0.685	0.716		0.573		0.3	0.589	0.467	0.314					0.546	0.748	0.465
0.468	0.361		0.363	0.333	0.413	0.327	0.239	0.326							0.522	0.538	0.272					0.793	0.69	0.628	0.408	0.779		0.487		0.47	0.3	0.354	0.371					0.652	0.343	0.057
0.428	0.18		0.327	0.509	0.403	0.2	0.374	0.321							0.657	0.542	0.465					0.538	0.696	0.7	0.673	0.721		0.369		0.544	0.177	0.236	0.48					0.615	0.404	0.506
0.386	0.298		0.19	0.238	0.483	0.596	0.359	0.471							0.561	0.513	0.069					0.632	0.772	0.585	0.639	0.56				0.469	0.358	0.726						0.666	0.487	0.422
0.36	0.65		0.469	0.583	0.449	0.366	0.171	0.486							0.55	0.596	0.404					0.655	0.685	0.338	0.508	0.622				0.714								0.567	0.707	0.504
0.554	0.314			0.323	0.556	0.476	0.287	0.596								0.57	0.421					0.666		0.613	0.4	0.775				0.542								0.66	0.667	0.094
0.692	0.275			0.294	0.521	0.357	0.287	0.629								0.997	0.351					0.614		0.494	0.411	0.44				0.217								0.527		0.073
0.691	0.355			0.41	0.507	0.296	0.491	0.419														0.478		0.637	0.543	0.684												0.633		0.247
0.588	0.503			0.458	0.408	0.353		0.397														0.432		0.624	0.632													0.623		0.194
0.413	0.478			0.419	0.37	0.489		0.621														0.432		0.765	0.701
0.431	0.429			0.56	0.392	0.676		0.447														0.442		0.595	0.587
0.44	0.501			0.38	0.371	0.398		0.371														0.595		0.749	0.58
0.467	0.38			0.459	0.703																	0.487		0.56	0.561
	0.394			0.377	0.404																			0.684	0.725
	0.513				0.379																			0.66	0.632
	0.305				0.478																			0.747	0.378
	0.328																							0.686	0.453
	0.467																								0.524
	0.445																								0.445
	0.473																								0.733

## Sheet: Related to Fig3d
Relative SCV/CI-M6PR co-licalization											Replicate 1				Replicate 2				Replicate 3
											WT	SseJ	SseJ-S152A		WT	SseJ	SseJ-S152A		WT	SseJ	SseJ-S152A
Replicate 1	WT	SseJ	SseJ-S152A								0.603	0.207	0.428		0.369	0.278	0.432		0.498	0.327	0.283
	100	64	92								0.373	0.194	0.337		0.376	0.042	0.527		0.469		0.331
											0.402	0.35	0.419		0.473	0.487	0.408		0.588		0.535
Replicate 2	WT	SseJ	SseJ-S152A								0.511	0.441	0.5		0.49	0.29	0.562		0.581		0.493
	100	68	116								0.38	0.642	0.516		0.482	0.256	0.573		0.846		0.29
											0.504	0.355	0.631		0.337	0.257	0.358		0.61	0.239	0.471
Replicate 3	WT	SseJ	SseJ-S152A								0.434	0.587	0.458		0.426	0.223	0.506		0.57	0.368	0.336
	100	63	94								0.57	0.306	0.562		0.349	0.265	0.616		0.507	0.487	0.327
											0.394	0.319	0.449		0.46	0.218	0.565		0.568	0.443	0.41
											0.709	0.517	0.356		0.273	0.207	0.475		0.446	0.447	0.568
											0.597	0.237	0.416		0.334	0.283	0.388		0.439	0.345	0.455
											0.579	0.424	0.365		0.148	0.209	0.472		0.358	0.308	0.607
											0.518	0.585	0.503		0.526	0.271	0.431		0.598	0.22	0.565
											0.416	0.236	0.379		0.358	0.233	0.4		0.233	0.221	0.454
											0.572	0.561	0.471		0.389	0.224	0.479		0.441	0.29	0.448
											0.656	0.548	0.283			0.291	0.5		0.235		0.407
											0.587	0.465	0.579			0.239	0.373		0.304		0.439
											0.47	0.223	0.567			0.384	0.421		0.28	0.274	0.3
											0.626	0.457	0.533			0.42	0.463		0.347	0.248	0.461
											0.689	0.347	0.483			0.224	0.367		0.519	0.464	0.396
											0.531	0.37	0.588				0.21		0.312	0.247	0.513
											0.575	0.215	0.523				0.335		0.55	0.342	0.631
											0.451	0.07	0.476						0.752	0.388	0.373
											0.611	0.14	0.504						0.347	0.213	0.376
											0.648	0.523	0.564						0.444	0.387	0.217
											0.599	0.475	0.529						0.36	0.229	0.295
											0.581	0.379	0.554						0.313	0.108	0.418
											0.483	0.538	0.336						0.374	0.357	0.489
											0.724	0.152	0.389						0.581	0.178	0.522
											0.54	0.236	0.508						0.468	0.103	0.493
											0.545	0.193	0.701						0.428	0.337	0.58
											0.445	0.398	0.689						0.386	0.256	0.526
											0.522	0.302	0.625						0.36	0.344	0.449
											0.543	0.195	0.646						0.554	0.291	0.48
											0.432	0.323	0.365						0.692	0.438	0.405
											0.452	0.257	0.7						0.691	0.178	0.544
												0.245	0.559						0.588	0.273	0.485
												0.238	0.455						0.413	0.3	0.476
												0.367	0.417						0.431	0.303
												0.208	0.369						0.44	0.297
												0.211	0.32						0.467	0.4
												0.212	0.472							0.1
												0.496	0.339							0.485
												0.2	0.587							0.244
												0.305	0.691							0.351
												0.583	0.512							0.213
													0.467							0.352
													0.451							0.173
																				0.387
																				0.192

## Sheet: Related to Fig 3e
TT puncta-associated fluorescece intensity
Replicate 1				Replicate 2
WT	SseJ	SseJ-S152A		WT	SseJ	SseJ-S152A
0.17915	0.0713552	0.311712		0.0939775	0.010723	0.0794065
0.0786873	0.0195751	0.183631		0.0326224	0.00476827	0.0517757
0.276787	0.108125	0.108982		0.208582	0.0291683	0.1545
0.347445	0.125063	0.366197		0.0966588	0.107699	0.0289443
1.1556	0.240211	0.0252109		0.104773	0.0267921	0.174255
0.182331	0.0347802	0.0502892		0.0618302	0.0651113	0.212896
0.365678	0.0845387	1.23491		0.0738074	0.0105442	0.0587583
0.171326	0.0696927	0.336098		0.0292386	0.0337037	0.0786706
0.131331	0.0485806	0.0273826		0.140646	0.113088	0.131851
0.190638	0.0148981	0.125907		0.0585113	0.0661298	0.0567701
0.252113	0.107609	0.105053		0.0615805	0.0136946	0.0254705
0.0645523	0.00840807	0.108569		0.310799	0.117916	0.0453599
0.0644464	0.168754	0.136773		0.0757127	0.0334249	0.0294595
0.379881	0.0919701	0.141287		0.130537	0.00400566	0.0293183
0.243152	0.112	0.0227948		0.0915383	0.0177797	0.200561
0.116561	0.0326438	0.19034		0.0986782	0.0978918	0.0413246
0.789927	0.0924045	0.48312		0.107296	0.0304293	0.0809878
0.201464	0.0142372	0.10231		0.0634834	0.0992476	0.032172
0.116387	0.007035	0.393994		0.0341643	0.0375923	0.0235832
0.181697	0.0202684	0.0675332		0.103675	0.0536835	0.0945098
