# Supplementary material for: Typhoid toxin sorting and exocytic transport from Salmonella Typhi-infected cells
Source: eLife. 2022 May 17;11:e78561. doi: 10.7554/eLife.78561 (PMC9142146; doi:10.7554/eLife.78561)
Supplement: Figure 4—figure supplement 5—source data 1. [file elife-78561-fig4-figsupp5-data1.xlsx]

## Sheet: Sheet1
Parental	Sec23B KO
0.525	0.834
0.438	0.865
0.465	0.587
0.584	0.857
0.775	0.826
0.712	0.672
0.834	0.947
0.763	0.66
0.853	0.799
0.79	0.627
0.824	0.526
0.769	0.715
0.894	0.934
0.797	0.903
0.509	0.972
0.837	0.807
0.89	0.838
0.529	0.522
0.781	0.436
0.772	0.61
0.611	0.573
0.794	0.808
0.578	0.808
0.379	0.622
0.868	0.831
0.852	0.817
0.884	0.738
0.86	0.611
0.869	0.654
0.9	0.988
0.774	0.661
0.693	0.573
0.656	0.854
0.768	0.627
0.888
