# Supplementary material for: Typhoid toxin sorting and exocytic transport from Salmonella Typhi-infected cells
Source: eLife. 2022 May 17;11:e78561. doi: 10.7554/eLife.78561 (PMC9142146; doi:10.7554/eLife.78561)
Supplement: Figure 4—source data 2. [file elife-78561-fig4-data2.xlsx]

## Sheet: Related to Fig.4b
Replicate 1				Replicate 2				Replicate 1				Replicate 2
Parental	Sec23B	AP4M1		Parental	Sec23B	AP4M1		Parental	CLTC	AP3B1		Parental	CLTC	AP3B1
0.0374501	0.0108877	0.0623372		0.0144634	0.00235234	0.0134979		0.0729318	0.0388318	0.0120244		0.0261556	0.0221857	0.114568
0.0859754	0.0212787	0.0245492		0.0369016	0.00986295	0.0165669		0.0398057	0.126604	0.0971452		0.0272208	0.0139718	0.0665638
0.0512915	0.0556396	0.0336295		0.0329184	0.00399515	0.00961123		0.026419	0.263796	0.0337827		0.0240465	0.0463692	0.0248256
0.0893087	0.0533486	0.14147		0.0143458	0.0131685	0.00993656		0.191493	0.0348237	0.0583147		0.0523033	0.0295226	0.012405
0.0562698	0.00158017	0.0724347		0.0180897	0.00764228	0.00598469		0.033203	0.0263911	0.101511		0.0272533	0.0178983	0.0280443
0.277973	0.0175443	0.032378		0.0209149	0.00769275	0.00780372		0.0206545	0.0937576	0.172776		0.0166362	0.0247263	0.042317
0.106877	0.02665	0.0748938		0.0206938	0.0131248	0.0172366		0.0319339	0.0824013	0.156681		0.0434791	0.0197452	0.0132211
0.0664548	0.0194569	0.0466121		0.0229787	0.00419583	0.00520434		0.0424521	0.237339	0.129435		0.0310504	0.0901696	0.0388661
0.084019	0.0396367	0.0568149		0.026703	0.00895428	0.0149176		0.0831327	0.0637132	0.0881773		0.0275085	0.0541329	0.0354844
0.0988496	0.0401554	0.0324687		0.0152898	0.00964782	0.0349938		0.0299389	0.128031	0.02167		0.0325416	0.0322133	0.0219636
0.0555426	0.0110391	0.230785		0.0235222	0.00643542	0.0321228		0.0388291	0.448189	0.0221006		0.0134761	0.0296139	0.0288953
0.0634417	0.00362279	0.0835397		0.0195227	0.00594351	0.0265751		0.100455	0.195053	0.0377996		0.0225655	0.0274876	0.0549178
0.11436	0.034526	0.0413026		0.00929775	0.0070014	0.0183223		0.0232514	0.0287465	0.0925054		0.0728739	0.063853	0.0418112
0.0567217	0.0272812	0.1007		0.0125637	0.00778353	0.014407		0.186956	0.0273933	0.00969411		0.0485423	0.023263	0.0145503
0.0327911	0.0151831	0.0544071		0.0079609	0.00669683	0.0254585		0.039876	0.0381748	0.152216		0.027855	0.0125269	0.129867
0.0273933	0.017946	0.0563605		0.00962082	0.00601376	0.00998254		0.127922	0.00910995	0.140225		0.0419842	0.056153	0.0614554
0.170356	0.00603013	0.0568304		0.015877	0.0133864	0.0237149		0.0496515	0.122956	0.0343511		0.0498432	0.0106442	0.120138
0.151348	0.0354632	0.0357842		0.0136287	0.00436588	0.0161164		0.0544868	0.240817	0.0710863		0.0069241	0.0588105	0.157174
0.236965	0.00780356	0.0449853		0.0167532	0.00521484	0.0228918		0.0514732	0.0329369	0.0332341			0.0212605	0.0282989
0.0675488	0.0210406	0.0351041		0.0305442	0.00796934	0.00722438		0.0201872	0.141734	0.0837205		0.0281156	0.0436786	0.0779091
0.116941	0.0398218	0.0366144		0.00901685	0.00644906	0.0262943
0.140339	0.0124406	0.0265602		0.0141465	0.00903943	0.0230785
0.0448523	0.0527721	0.096328		0.0111929	0.00439377	0.0209351
0.121131	0.0175609	0.143058		0.0279906	0.00702857	0.0268774
0.0771875	0.043431	0.0302934		0.0188297	0.0121323	0.0124237
0.0308477	0.0227388	0.0448902		0.0106367	0.00721713	0.0117803
0.140359	0.00453308	0.0477952		0.0185019	0.00223843	0.0298403
0.0536476	0.0287267	0.0271987		0.0213401	0.00349177	0.00983818
0.0177712	0.0200189	0.0196173		0.0112289	0.0110331	0.021746
0.0417065	0.0172384	0.167977		0.0359464	0.00731738	0.0194421

## Sheet: Related to Fig.4c and 4d
Replicate 1				Replicate 2				Replicate 3				Replicate 4				Replicate 5				Replicate 6				Replicate 7				Replicate 8
Parental	G0G1	G2M		Parental	G0G1	G2M		Parental	G0G1	G2M		Parental	G0G1	G2M		Parental	G0G1	G2M		Parental	G0G1	G2M		Parental	G0G1	G2M		Parental	G0G1		G2M
1X	0	90.5		2X	7.82	72.2		1X	1.89	90.5		2X	3.87	89.7		2X	16.4	73.8		1X	0	98.2		1X	0.3	92.3		2X	1.96	10.6	91.7	77
2X	0	90.3		4X	20.7	56.3		2X	3.56	86.4		4X	4.75	83.1		4X	21.3	52.5		2X	0.39	90.7		2X	4.8	82.9		4X	3.58	15.9	90.2	70
4X	0.53	84.7		8X	30	51.3		4X	10.5	76.3		8X	11.9	72.2		8X	38.7	28.1		4X	0.239	84.6		4X	8.7	77.8		8X	10.6	19.3	78.8	60
8X	3.57	85.3		16X	44.1	31.7		8X	14.4	74.5		16X	18	60.7		16X	49.7	21.9		8X	6.26	83.2		8X	17.2	69.6		16X	21.6	37.8	66	48
16X	14.3	74.5		32X	45.8	17.3		16X	27.1	56.8		32X	27.3	50.8						16X	14.1	75		16X	24.5	61		32X	32.4	44.3	49.5	35.2
				64X	53.2	15.5						64X	34.1	36.3		Sec23B	G0G1	G2M		32X	23.6	62		32X	33.7	50.2		64X	45.1	48.4	35	24.3
Sec23B	G0G1	G2M														2X	25.1	52.1
1X	0.93	94.9		Sec23B	G0G1	G2M		AP3B1	G0G1	G2M		Sec23B	G0G1	G2M		4X	36.6	34.6		Sec23B	G0G1	G2M		Sec23B	G0G1	G2M		CLTC	G0G1		G2M
2X	2.51	88.2		2X	28	47		1X	3.58	88.4		2X	5.72	79.2		8X	50.2	15.3		1X	11.9	74.7		1X	7.38	79.7		2X	2.63	9.37	86.7	71.9
4X	10.2	77.9		4X	38	38		2X	2.38	90.7		4X	12	70.6		16X	50.1	16.7		2X	16.9	69.8		2X	13.1	72.7		4X	4.5	15.3	84.9	65.5
8X	23.3	64.7		8X	50	16		4X	3.73	83.7		8X	20	59.4						4X	31.7	50.8		4X	25.9	55.1		8X	16	27.6	71.7	50.1
16X	37.7	42.6		16X	54	16		8X	9.88	82		16X	34	38.5		AP4M1	G0G1	G2M		8X	45.5	36.4		8X	35.1	41.4		16X	21.5	32.3	64	44.9
				32X	57	12		16X	16.3	76.2		32X	39	30.6		2X	37.9	32.3		16X	48.6	29.9		16X	45.9	30.1		32X	39.9	40.2	40.7	35
Sec23B	G0G1	G2M		64X	60	11						64X	45	25.3		4X	46.5	20.1		32X	53.2	21.3		32X	53.4	27.7		64X	46.9	44.4	27.6	34.6
1X	0.288	90.4						AP3B1	G0G1	G2M						8X	49.9	15.3
2X	3.94	88.8		AP4M1	G0G1	G2M		1X	2.16	85.5		AP4M1	G0G1	G2M		16X	54.6	11.2		AP4M1	G0G1	G2M		Sec23B	G0G1	G2M		Sec23B	G0G1		G2M
4X	11	78.9		2X	30.7	47.4		2X	2.19	90.5		2X	10.5	72						1X	22.1	62.3		1X	1.16	82.6		2X	7.93	16	82.5	60.9
8X	19.7	66.1		4X	40	28		4X	3.61	87.6		4X	21	58						2X	36.8	48		2X	6.09	76.2		4X	15.4	24.7	70.7	54.5
16X	35.4	51.8		8X	49	15		8X	7.86	82.6		8X	30	41						4X	45	37		4X	9.5	63.2		8X	34.2	35	47.1	41.3
				16X	49	13		16X	15.5	74		16X	37.3	24						8X	46.5	28.2		8X	19.5	48.2		16X	42.4	43	35.2	28.6
				32X	52	13						32X	47	22						16X	54	23.4		16X	34.6	53.2		32X	49	51.8	25.4	22.6
				64X	56	8		AP4M1	G0G1	G2M		64X	46	20						32X	54.4	23.3		32X	41.4	34.2		64X	51.9	50.8	22.2	20.8
								1X	1.07	90.4
								2X	3.8	82.5																		AP3B1	G0G1		G2M
								4X	12.5	72																		2X	2.76	13.8	88.1	70.2
								8X	22.2	63.2																		4X	1.39	11.6	86.5	70.5
								16X	40.1	40.7																		8X	2.2	11.2	88.8	68.8
																												16X	3.93	14.8	86	58.5
								AP4M1	G0G1	G2M																		32X	14.3	21.4	70.8	53.4
								1X	6.25	82.9																		64X	26.2	31.9	58.1	47.2
								2X	14	66.4
								4X	36.3	38																		AP4M1	G0G1		G2M
								8X	44.6	35.9																		2X	6.96	16.3	82.3	62.5
								16X	49.3	27.1																		4X	16.1	29.1	71	52.4
																												8X	33.5	37.3	46.7	41.1
																												16X	41.4	43.8	35.3	30.8
																												32X	50.8	49.1	25	25.7
																												64X	50.9	55.2	24.7	24.2

## Sheet: Related to Fig. 4e
Replicate 1				Replicate 2
Parental	Sar1B KO	STX4 KO		Parental	Sar1B KO	STX4 KO
0.0382257	0.0240052	0.0564639		0.0224546	0.0269707	0.033728
0.0520618	0.00382737	0.15283		0.0442818	0.0461496	0.0285112
0.0329321	0.0321908	0.0212051		0.0867767	0.0309391	0.0385061
0.0384034	0.0259785	0.0419215		0.0144891	0.0816725	0.0257692
0.0399237	0.00174636	0.0214524		0.111773	0.0211509	0.312423
0.0598765	0.0250595	0.0664387		0.550449	0.0418553	0.0348039
0.0606414	0.00526181	0.0438132		0.0204679	0.0401469	0.0535954
0.0921267	0.017207	0.0465942		0.0502007	0.0548292	0.0465861
0.144583	0.0185022	0.120632		0.0283537	0.194603	0.0385061
0.0243197	0.00815807	0.0413677		0.0515436	0.017105	0.0503427
0.0265552	0.02556	0.213871		0.0565664	0.0486612	0.574152
0.00670828	0.0282187	0.229907		0.260566	0.0584356	0.160047
0.0190327	0.0290609	0.0818483		0.110907	0.0266899	0.0463008
0.226801	0.0504285	0.0269246		0.0553238	0.0308675	0.274559
0.301405	0.00716731	0.0350319		0.351181	0.0928773	0.0644647
0.0294606				0.572334	0.0166996	0.288564
0.0616942				0.282549	0.0262094	0.578186
0.0343434				0.350034	0.249904	0.11876
0.0460564				0.126654	0.0553424	0.151815
0.0481074				0.0745928	0.0469328	0.610267
					0.133597	0.223341
					0.0273448	0.111229
					0.0471708	0.0319272
					0.00689091	0.109446
					0.0678638	0.0897918
					0.425698	0.212824
					0.177771	0.0365369
					0.241915	0.0729595
					0.0304626	0.122033
					0.0926128	0.0189511

## Sheet: Related to Fig. 4g and 4h
Replicate 1				Replicate 2				Replicate 3
WT	G0G1	G2M		WT	G0G1	G2M		WT	G0G1	G2M
4x	2.22	95.7		4x	5.16	84.2		4x	1.09	93.8
8x	6.34	91.2		8x	5.44	82.8		8x	4.82	91.4
16x	12.4	83.2		16x	12.8	75.3		16x	14.7	77.3
32x	24.9	71		32x	21.8	68.2		32x	23.2	68.3
64x	35.9	56.9		64x	29.9	55.6		64x	32.8	57.8
128x	46.5	49.6		128x	37.1	49.1		128x	52.5	38.2
Sar1B	G0G1	G2M		Sar1B	G0G1	G2M		Sar1B	G0G1	G2M
4x	4.74	88.6		4x	4.62	87.8		4x	1.97	93.9
8x	11.1	81.7		8x	10.2	77.9		8x	10.9	83.5
16x	26.1	68.3		16x	19.9	67.2		16x	24.3	66.1
32x	38.4	54.3		32x	27.4	60.8		32x	36.3	52.1
64x	54	35		64x	47.8	32.9		64x	49.1	38.4
128x	58.7	24.3		128x	51.2	29		128x	53.1	32
