# Supplementary material for: Typhoid toxin sorting and exocytic transport from Salmonella Typhi-infected cells
Source: eLife. 2022 May 17;11:e78561. doi: 10.7554/eLife.78561 (PMC9142146; doi:10.7554/eLife.78561)
Supplement: Figure 5—source data 1. [file elife-78561-fig5-data1.xlsx]

## Sheet: Related to Fig. 5a
Parental	Rab11A	Rab11B	HPS4	Rab27A	Rab27B
100	179.487	34.4828	100	72.973	166.667
100	92.3077	35.8974	60	159.459	166.667
100	71.7949	76		118.919	100
100		77
100

## Sheet: Related to Fig. 5c
Replicate 1			Replicate 2
Parental	Rab11B KO		Parental	Rab11B KO	VAMP7 KO
0.0260955	0.0091761		0.0299117	0.0174966	0.0357915
0.0219965	0.0126686		0.00522567	0.0367748	0.0193529
0.0249157	0.00438145		0.0279184	0.0721236	0.033395
0.0189249	0.00670243		0.0240502	0.0196886	0.00517
0.0102578	0.0100008		0.0381201	0.0491221	0.0331786
0.0139521	0.00359575		0.0194224	0.0188873	0.00997892
0.0545134	0.00768253		0.0187823	0.00590019	0.0177635
0.00645012	0.0140428		0.0454961	0.0187692	0.0203386
0.0331889	0.0759982		0.0411464	0.018774	0.0811065
0.0148756	0.0170449		0.0419303	0.0250563	0.0211109
0.012708	0.0142196		0.00928792	0.0321259	0.00589804
0.0112059	0.0118609		0.0457933	0.0346706	0.0686105
0.0069743	0.0181196		0.0764867	0.0170515	0.0348724
0.010908	0.00887025		0.0611397	0.0449155	0.0110206
0.0311672	0.0171529		0.0322754	0.0180825	0.00607079
0.0279854	0.00393003		0.02554	0.0176774	0.0517753
0.0233633	0.00413381		0.0155922	0.0232068	0.0408828
0.0798525	0.00865644		0.0914436	0.0312632	0.0519497
0.028366	0.0130438		0.0143782	0.0328485	0.0292243
0.0436355	0.00942504		0.0766624	0.0418913	0.0255709
0.0106311	0.0209962		0.0127172	0.0153871	0.0295663
0.0219155	0.0125929		0.0779104	0.0207615	0.015693
0.0166511	0.0311004		0.0156321	0.024376	0.027772
0.0124812	0.00507478		0.0310668	0.0439094	0.032781
0.0207324	0.00542752		0.0384506	0.0694141	0.0175029
0.0698148	0.00842739		0.0301179	0.00936416	0.0264186
0.013482	0.039531		0.0837427	0.0121857	0.0225347
0.0778009	0.00920646		0.0297227	0.0213222	0.0131539
0.0225494	0.0180488		0.0461828	0.0107922	0.0211159
0.0189265	0.0114832		0.0281547	0.0402457	0.0261246

## Sheet: Related to Fig. 5d
Parental	Rip11 KO
100	39.5062
100	44.4444
100	50
	53.5714

## Sheet: Related to Fig. 5f 
Replicate 1			Replicate 2
Parental	Rip11 KO		Parental	Rip11 KO
0.0054425	0.00684406		0.0117938	0.0337434
0.0117982	0.00444837		0.0344788	0.0120797
0.0173267	0.033285		0.00995568	0.0248291
0.00248382	0.100269		0.0700718	0.046033
0.00218516	0.14599		0.0219282	0.0306254
0.00917832	0.0164251		0.0170926	0.0130401
0.155464	0.0686522		0.0861321	0.0117501
0.0384269	0.0145154		0.106299	0.0335139
0.00505372	0.0244118		0.0333106	0.0232002
0.0351136	0.0191121		0.0944064	0.0123865
	0.114316		0.039248	0.0154098
	0.00851576		0.0281835	0.0123517
	0.00661243		0.0272936	0.0194218
	0.0211629		0.0205209	0.0607029
	0.0164206		0.0825757	0.0618531
	0.00434146		0.030086	0.0108297
	0.00673887		0.166828	0.0761548
	0.0257104		0.0241269	0.0164453
	0.0119149		0.0146544	0.0203567
	0.0119991		0.107118	0.0758277
				0.00690813
				0.038381
				0.0399041
				0.119058
				0.164609
				0.02196
				0.072214
				0.0307643
				0.00946052
				0.0138709
				0.02797
				0.0412524
				0.0340211
				0.0246485
				0.00313657
				0.056869
				0.0163725
				0.0177341
				0.0154753
				0.0173116
