# Supplementary material for: Typhoid toxin sorting and exocytic transport from Salmonella Typhi-infected cells
Source: eLife. 2022 May 17;11:e78561. doi: 10.7554/eLife.78561 (PMC9142146; doi:10.7554/eLife.78561)
Supplement: Figure 6—source data 1. [file elife-78561-fig6-data1.xlsx]

## Sheet: Related to Fig. 6a
Parental	EXOC7	SNAP23	STX4	STX11	VAMP7
100	100	33.0769	53.3333	83	54.5455
100	100	51.5385	73.3333	144	59.0909
100	70	34.6154	43.7		38.5714
		20.7692	7.4
		40.7692

## Sheet: Related to Fig. 6c
Replicate 1				Replicate 2				Replicate 1			Replicate 2			Replicate 1				Replicate 2
Parental	Rab11B KO	VAMP7 KO		Parental	CI-M6PR KO	VAMP7 KO		Parental	SNAP23 KO		Parental	SNAP23 KO		Parental	Sar1B KO	STX4 KO		Parental	Sar1B KO	STX4 KO
0.0299117	0.0174966	0.0357915		0.0323962	0.0177962	0.0195029		0.0242533	0.0195993		0.0067277	0.0788134		0.0382257	0.0240052	0.0564639		0.0224546	0.0269707	0.033728
0.00522567	0.0367748	0.0193529		0.134471	0.00801602	0.0260172		0.0342202	0.00724245		0.0151516	0.0808635		0.0520618	0.00382737	0.15283		0.0442818	0.0461496	0.0285112
0.0279184	0.0721236	0.033395		0.0179968	0.0049627	0.0331204		0.011727	0.00813951		0.238927	0.206245		0.0329321	0.0321908	0.0212051		0.0867767	0.0309391	0.0385061
0.0240502	0.0196886	0.00517		0.0241439	0.016368	0.0366272		0.1165	0.00595695		0.0884623	0.120478		0.0384034	0.0259785	0.0419215		0.0144891	0.0816725	0.0257692
0.0381201	0.0491221	0.0331786		0.0484385	0.0210217	0.0413816		0.0243333	0.0235634		0.0538665	0.150944		0.0399237	0.00174636	0.0214524		0.111773	0.0211509	0.312423
0.0194224	0.0188873	0.00997892		0.0532885	0.0229986	0.0161086		0.00796035	0.0154423		0.0814242	0.0367769		0.0598765	0.0250595	0.0664387		0.550449	0.0418553	0.0348039
0.0187823	0.00590019	0.0177635		0.231018	0.00774736	0.15338		0.0181687	0.00679589		0.0960125	0.0512047		0.0606414	0.00526181	0.0438132		0.0204679	0.0401469	0.0535954
0.0454961	0.0187691	0.0203386		0.0210799	0.0203596	0.0241		0.0202501	0.00805681		0.0485539	0.062928		0.0921267	0.017207	0.0465942		0.0502007	0.0548292	0.0465861
0.0411464	0.018774	0.0811065		0.0160777	0.00993491	0.0187867		0.00671827	0.0188547		0.0237014	0.135249		0.144583	0.0185022	0.120632		0.0283537	0.194603	0.0385061
0.0419303	0.0250563	0.0211109		0.00529744	0.0222108	0.0421378		0.00862837	0.0377858		0.10998	0.426481		0.0243197	0.00815807	0.0413677		0.0515436	0.017105	0.0503427
0.00928792	0.0321259	0.00589804		0.104305	0.0108162	0.0921641		0.00455403	0.0319485		0.0776198	0.166327		0.0265552	0.02556	0.213871		0.0565664	0.0486612	0.574152
0.0457933	0.0346706	0.0686105		0.081953	0.0366124	0.0197286		0.00591405	0.0596933		0.0252312	0.0746364		0.00670828	0.0282187	0.229907		0.260566	0.0584356	0.160047
0.0764867	0.0170515	0.0348724		0.0508738	0.0223568	0.506825		0.00947806	0.0156704		0.0744508	0.0927912		0.0190327	0.0290609	0.0818483		0.110907	0.0266899	0.0463008
0.0611397	0.0449155	0.0110206		0.0978813	0.0475252	0.0336291		0.0125176	0.0184656		0.128667	0.0414078		0.226801	0.0504285	0.0269246		0.0553238	0.0308675	0.274559
0.0322754	0.0180825	0.00607079		0.036577	0.0114049	0.0728448		0.0189017	0.0113136		0.0698849	0.132769		0.301405	0.00716731	0.0350319		0.351181	0.0928773	0.0644647
0.02554	0.0176774	0.0517753		0.0594101	0.0236981	0.062168		0.00225822	0.200722		0.0828854	0.0956174		0.0294606				0.572334	0.0166996	0.288564
0.0155922	0.0232068	0.0408828		0.0377135	0.0126609	0.0231789		0.0242517	0.255761		0.0565931	0.125224		0.0616942				0.282549	0.0262094	0.578186
0.0914436	0.0312632	0.0519497		0.0459927	0.0486985	0.0847228		0.0105039	0.145346		0.131247	0.144854		0.0343434				0.350034	0.249904	0.11876
0.0143782	0.0328485	0.0292243		0.0776033	0.023519	0.0524674		0.00839666	0.847435		0.0586341	0.154468		0.0460564				0.126654	0.0553424	0.151815
0.0766624	0.0418913	0.0255709		0.044012	0.0149932	0.01986		0.0362163	0.24757		0.0152443	0.0326103		0.0481074				0.0745928	0.0469328	0.610267
0.0127172	0.0153871	0.0295663		0.0272196	0.0211967	0.0520737		0.0462319	0.207878		0.0874327	0.215969							0.133597	0.223341
0.0779104	0.0207615	0.015693		0.028949	0.0300206	0.0143982		0.00438215	0.0334683		0.0593789	0.0432496							0.0273448	0.111229
0.0156321	0.024376	0.027772		0.0277581	0.0112231	0.0318289		0.00730771	0.147202		0.0231567	0.109809							0.0471708	0.0319272
0.0310668	0.0439094	0.032781		0.127549	0.00895941	0.0396864		0.023394	0.179351		0.0722325	0.132066							0.00689091	0.109446
0.0384506	0.0694141	0.0175029		0.0890494	0.0133234	0.0373951		0.00329399	0.0285179		0.0238233	0.0548362							0.0678638	0.0897918
0.0301179	0.00936416	0.0264186		0.0316849	0.0130797	0.00981086		0.00632038	0.0081114		0.161659	0.0845997							0.425698	0.212824
0.0837427	0.0121857	0.0225347		0.348978	0.0283467	0.0174514		0.000635758	0.0327855		0.0670541	0.0383463							0.177771	0.0365369
0.0297227	0.0213222	0.0131539		0.0926636	0.046049	0.0181688		0.0135405	0.067566		0.244421	0.117607							0.241915	0.0729595
0.0461828	0.0107922	0.0211159		0.0253837	0.0145952	0.0288075		0.0698967	0.0448426		0.0927127	0.0504526							0.0304626	0.122033
0.0281547	0.0402457	0.0261246		0.238003	0.0166501	0.0702526		0.00678977	0.0329361		0.105701	0.308388							0.0926128	0.0189511
												0.0596805
